# Supplementary material for: A predictive chemistry DFT study of N2O functionalization for the preparation of triazolopyridine and triazoloquinoline scaffolds
Source: Royal Society of Chemistry journal article supplement (doi:10.1039/d2qo00589a), 2022-01-01
Supplement: d2qo00589a1.pdf [file d2qo00589a1.pdf]

## A predictive chemistry DFT study of the N2O functionalization for the preparation of triazolopyridine and triazoloquinoline scaffolds

Roger Monreal-Corona, Emili Besalú, Anna Pla-Quintana and Albert Poater\*

Institut de Química Computacional i Catàlisi and Departament de Química, Universitat de Girona, C/ Maria Aurèlia Capmany, 69, 17003 Girona, Catalonia, Spain

### Electronic Supplementary Information

(85 pages)

#### Contents:

**Figure S1.** Yield (%) vs  $\Delta G^\ddagger$  (kcal/mol) plot of entries 1 to 5 of Table 1.

**Figure S2.** Yield (%) vs  $\Delta G$  (kcal/mol) plot of entries 1 to 5 of Table 1.

**Table S1.** Summary of the activation energy (in kcal/mol), HOMO and LUMO energies (in a.u.), chemical potential, chemical hardness and electrophilicity of species **B** of the different predicted scaffolds at the B3LYP-D3(SMD)/Def2SVP level of theory in tetrahydrofuran.

**Table S2.** Summary of the activation energy (in kcal/mol), HOMO and LUMO energies (in a.u.), chemical potential, chemical hardness and electrophilicity of species **B** of the different predicted scaffolds at the B3LYP-D3(SMD)/Def2TZVP level of theory in tetrahydrofuran.

**Table S3.** Summary of the activation energy (in kcal/mol), HOMO and LUMO energies (in a.u.), chemical potential, chemical hardness and electrophilicity of species **B** of the different predicted scaffolds at the B3LYP-D3(SMD)/Def2SVP level of theory in tetrahydrofuran involving two explicit molecules of THF.

**Table S4.** Summary of the activation energy (in kcal/mol), HOMO and LUMO energies (in a.u.), chemical potential, chemical hardness and electrophilicity of species **B** of the different predicted scaffolds at the B3LYP-D3(SMD)/Def2TZVP level of theory in tetrahydrofuran involving two explicit molecules of THF.

**Table S5.** HOMO and LUMO shapes of species **B** of the different predicted scaffolds at the B3LYP-D3(SMD)/Def2SVP level of theory in tetrahydrofuran.

**Table S6.** B3LYP-D3(SMD)/Def2SVP Cartesian coordinates of the optimized geometries in tetrahydrofuran of the species calculated in this study.

**Figure S1.** Yield (%) vs  $\Delta G^\ddagger$  (kcal/mol) plot of entries 1 to 5 of Table 1.

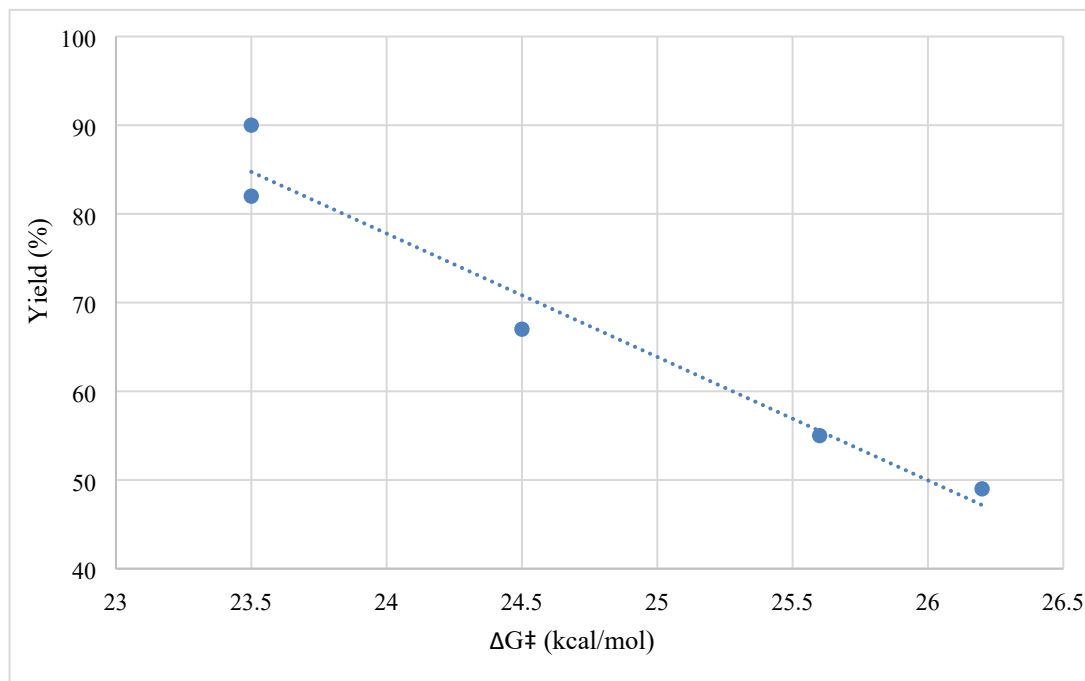

**Figure S2.** Yield (%) vs  $\Delta G$  (kcal/mol) plot of entries 1 to 5 of Table 1.

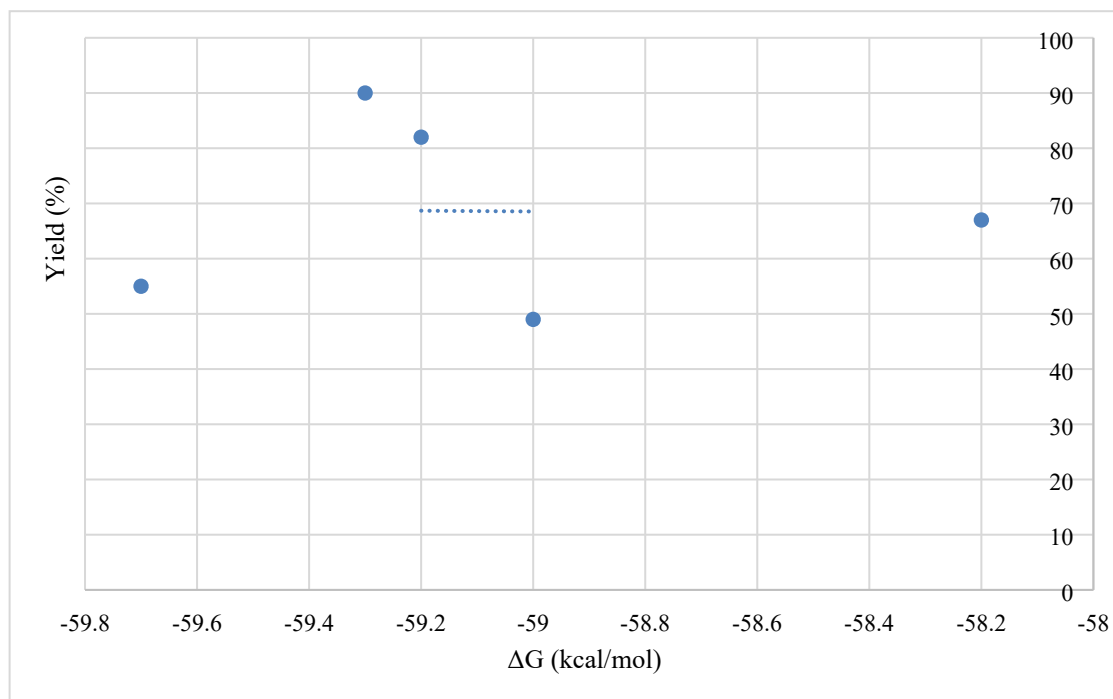

One thing that needs to be noticed is that different scaffolds (*i.e.* triazolopyridines and triazoloquinolines) show the same trend but the regression equation is not exactly the same due to the differences in structure. Only entries 1 to 5 should be taken to study the correlation since they are substituted in the phenyl ring of the 2-benzylpyridine species. Taking those, the correlation equation shown in Figure S1 is obtained. Moreover, a clear tendency is observed in Table 1 in which it is shown that the lower the barrier of the rds, the higher the yield, so we consider that being able to obtain energy barriers for the 2 and 3-nitrogen derivatives lower than the experimental species is a clear indicative of a higher expected experimental yield for their synthesis. Considering other descriptors such as the  $\Delta G$  of formation of the triazolopyridine and triazoloquinoline scaffolds, no correlation can be observed between this magnitude and the reported experimental yields. Not even considering the similar scaffolds (*i.e.* phenyl-substituted 2-benzylpyridine species) a good correlation is observed as shown in Figure S2. Therefore, that indicates that the best-found descriptor to predict the experimental yield is the  $\Delta G^\ddagger$  value.

**Table S1.** Summary of the activation energy (in kcal/mol), HOMO and LUMO energies (in a.u.), chemical potential, chemical hardness and electrophilicity of species **B** of the different predicted scaffolds at the B3LYP-D3(SMD)/Def2SVP level of theory in tetrahydrofuran.

|          |   | $\Delta G^\ddagger$<br>(kcal/mol) | HOMO<br>(a.u.) | LUMO<br>(a.u.) | Chemical<br>Potential | Chemical<br>Hardness | Electrophilicity |
|----------|---|-----------------------------------|----------------|----------------|-----------------------|----------------------|------------------|
| Pyridine |   | 26.7                              | -0.19984       | -0.04667       | -0.123                | 0.153                | 0.050            |
| 2N       | 1 | 24.2                              | -0.18909       | -0.06744       | -0.128                | 0.122                | 0.068            |
|          | 2 | 24.5                              | -0.17917       | -0.06750       | -0.123                | 0.112                | 0.068            |
|          | 3 | 22.6                              | -0.17840       | -0.05937       | -0.119                | 0.119                | 0.059            |
|          | 4 | 22.3                              | -0.18005       | -0.05647       | -0.118                | 0.124                | 0.057            |
| 3N       | 5 | 18.3                              | -0.18238       | -0.07009       | -0.126                | 0.112                | 0.071            |
|          | 6 | 20.6                              | -0.18327       | -0.08375       | -0.134                | 0.100                | 0.090            |
|          | 7 | 20.7                              | -0.18153       | -0.08996       | -0.136                | 0.092                | 0.101            |
|          | 8 | 22.2                              | -0.18319       | -0.08976       | -0.136                | 0.093                | 0.100            |
|          | 9 | 19.1                              | -0.18462       | -0.08614       | -0.135                | 0.098                | 0.093            |

**Table S2.** Summary of the activation energy (in kcal/mol), HOMO and LUMO energies (in a.u.), chemical potential, chemical hardness and electrophilicity of species **B** of the different predicted scaffolds at the B3LYP-D3(SMD)/Def2TZVP level of theory in tetrahydrofuran.

|          |   | $\Delta G^\ddagger$<br>(kcal/mol) | HOMO<br>(a.u.) | LUMO<br>(a.u.) | Chemical<br>Potential | Chemical<br>Hardness | Electrophilicity |
|----------|---|-----------------------------------|----------------|----------------|-----------------------|----------------------|------------------|
| Pyridine |   | 26.7                              | -0.21208       | -0.05102       | -0.132                | 0.161                | 0.054            |
| 2N       | 1 | 24.2                              | -0.19302       | -0.07226       | -0.133                | 0.121                | 0.073            |
|          | 2 | 24.5                              | -0.19242       | -0.07135       | -0.132                | 0.121                | 0.072            |
|          | 3 | 22.6                              | -0.19237       | -0.0635        | -0.128                | 0.129                | 0.064            |
|          | 4 | 22.3                              | -0.19328       | -0.06056       | -0.127                | 0.133                | 0.061            |
| 3N       | 5 | 18.3                              | -0.19620       | -0.07327       | -0.135                | 0.123                | 0.074            |
|          | 6 | 20.6                              | -0.19629       | -0.08711       | -0.142                | 0.109                | 0.092            |
|          | 7 | 20.7                              | -0.19531       | -0.09390       | -0.145                | 0.101                | 0.103            |
|          | 8 | 22.2                              | -0.19616       | -0.09382       | -0.145                | 0.102                | 0.103            |
|          | 9 | 19.1                              | -0.19755       | -0.0905        | -0.144                | 0.107                | 0.097            |

**Table S3.** Summary of the activation energy (in kcal/mol), HOMO and LUMO energies (in a.u.), chemical potential, chemical hardness and electrophilicity of species **B** of the different predicted scaffolds at the B3LYP-D3(SMD)/Def2SVP level of theory in tetrahydrofuran involving two explicit molecules of THF.

|          |   | $\Delta G^\ddagger$<br>(kcal/mol) | HOMO<br>(a.u.) | LUMO<br>(a.u.) | Chemical<br>Potential | Chemical<br>Hardness | Electrophilicity |
|----------|---|-----------------------------------|----------------|----------------|-----------------------|----------------------|------------------|
| Pyridine |   | 23.5                              | -0.18901       | -0.03924       | -0.114                | 0.150                | 0.043            |
| 2N       | 1 | 21.9                              | -0.17251       | -0.06141       | -0.117                | 0.111                | 0.062            |
|          | 2 | 21.6                              | -0.17210       | -0.06219       | -0.117                | 0.110                | 0.062            |
|          | 3 | 21.2                              | -0.17013       | -0.05226       | -0.111                | 0.118                | 0.052            |
|          | 4 | 18.9                              | -0.17201       | -0.04951       | -0.111                | 0.123                | 0.050            |
| 3N       | 5 | 17.0                              | -0.17463       | -0.06277       | -0.119                | 0.112                | 0.063            |
|          | 6 | 18.2                              | -0.17384       | -0.07759       | -0.126                | 0.096                | 0.082            |
|          | 7 | 19.8                              | -0.17260       | -0.08497       | -0.129                | 0.088                | 0.095            |
|          | 8 | 19.8                              | -0.17612       | -0.08289       | -0.130                | 0.093                | 0.090            |
|          | 9 | 16.1                              | -0.17670       | -0.07917       | -0.128                | 0.098                | 0.084            |

**Table S4.** Summary of the activation energy (in kcal/mol), HOMO and LUMO energies (in a.u.), chemical potential, chemical hardness and electrophilicity of species **B** of the different predicted scaffolds at the B3LYP-D3(SMD)/Def2TZVP level of theory in tetrahydrofuran including two explicit molecules of THF.

|          |   | $\Delta G^\ddagger$<br>(kcal/mol) | HOMO<br>(a.u.) | LUMO<br>(a.u.) | Chemical<br>Potential | Chemical<br>Hardness | Electrophilicity |
|----------|---|-----------------------------------|----------------|----------------|-----------------------|----------------------|------------------|
| Pyridine |   | 23.5                              | -0.20034       | -0.04205       | -0.121                | 0.158                | 0.046            |
| 2N       | 1 | 21.9                              | -0.18429       | -0.06649       | -0.125                | 0.118                | 0.067            |
|          | 2 | 21.6                              | -0.18410       | -0.06542       | -0.125                | 0.119                | 0.066            |
|          | 3 | 21.2                              | -0.18213       | -0.05677       | -0.119                | 0.125                | 0.057            |
|          | 4 | 18.9                              | -0.18373       | -0.05400       | -0.119                | 0.130                | 0.054            |
| 3N       | 5 | 17.0                              | -0.18696       | -0.06624       | -0.127                | 0.121                | 0.066            |
|          | 6 | 18.2                              | -0.18707       | -0.08044       | -0.134                | 0.107                | 0.084            |
|          | 7 | 19.8                              | -0.18556       | -0.08820       | -0.137                | 0.097                | 0.096            |
|          | 8 | 19.8                              | -0.18765       | -0.08652       | -0.137                | 0.101                | 0.093            |
|          | 9 | 16.1                              | -0.18831       | -0.08372       | -0.136                | 0.105                | 0.088            |

**Table S5.** HOMO and LUMO shapes of species **B** of the different predicted scaffolds at the B3LYP-D3(SMD)/Def2SVP level of theory in tetrahydrofuran.

|          |   | HOMO                                                                                | LUMO                                                                                 |
|----------|---|-------------------------------------------------------------------------------------|--------------------------------------------------------------------------------------|
| Pyridine |   | 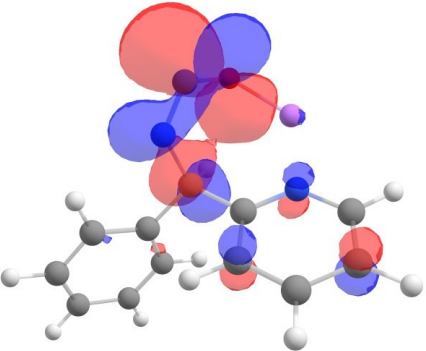   |    |
| 2N       | 1 |    |    |
|          | 2 |   |   |
|          | 3 |  |  |

|    |   |                                                                                     |                                                                                      |
|----|---|-------------------------------------------------------------------------------------|--------------------------------------------------------------------------------------|
|    | 4 | 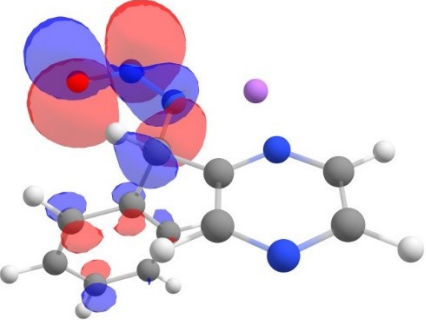   |    |
|    | 5 |    |    |
| 3N | 6 |   |   |
|    | 7 |  |  |

|   |                                                                                   |                                                                                    |
|---|-----------------------------------------------------------------------------------|------------------------------------------------------------------------------------|
| 8 | 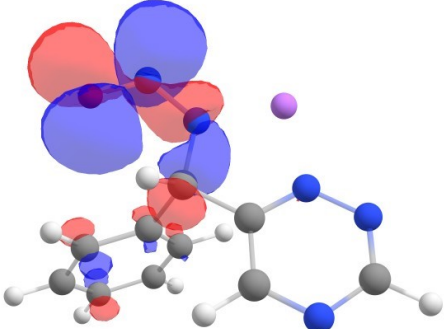 |  |
| 9 |  |  |



**Table S6.** B3LYP-D3(SMD)/Def2SVP Cartesian coordinates of the optimized geometries in tetrahydrofuran of the species calculated in this study.

|                                              |           |           |           |
|----------------------------------------------|-----------|-----------|-----------|
| 3                                            |           |           |           |
| N2O SCF Done: -184.741556793 A.U.            |           |           |           |
| N                                            | -0.000000 | 0.070274  | -0.000000 |
| N                                            | 0.001250  | 1.199698  | -0.000000 |
| O                                            | -0.001093 | -1.111226 | 0.000000  |
| 14                                           |           |           |           |
| <i>n</i> -BuLi SCF Done: -165.429354193 A.U. |           |           |           |
| C                                            | 2.178276  | -0.271361 | 0.000032  |
| H                                            | 2.256985  | -0.922316 | -0.888681 |
| H                                            | 2.256894  | -0.922361 | 0.888722  |
| H                                            | 3.057701  | 0.395249  | 0.000094  |
| C                                            | 0.862531  | 0.509668  | -0.000025 |
| H                                            | 0.827533  | 1.177568  | 0.881777  |
| H                                            | 0.827583  | 1.177558  | -0.881837 |
| C                                            | -0.396946 | -0.376064 | -0.000047 |
| H                                            | -0.328128 | -1.052656 | 0.877800  |
| H                                            | -0.328159 | -1.052567 | -0.877965 |
| C                                            | -1.750764 | 0.360746  | 0.000023  |
| H                                            | -1.753077 | 1.056506  | -0.872754 |
| H                                            | -1.753029 | 1.056441  | 0.872852  |
| Li                                           | -3.474294 | -0.750451 | 0.000030  |
| 13                                           |           |           |           |
| THF SCF Done: -232.550535764 A.U.            |           |           |           |
| C                                            | 1.180676  | -0.463699 | -0.000000 |
| O                                            | 0.000007  | -1.253377 | -0.000001 |
| C                                            | -1.180670 | -0.463707 | -0.000000 |
| C                                            | -0.773022 | 1.024635  | 0.000001  |
| C                                            | 0.773013  | 1.024640  | 0.000000  |
| H                                            | 1.787896  | -0.717991 | 0.889304  |
| H                                            | 1.787896  | -0.717990 | -0.889304 |
| H                                            | -1.787896 | -0.718011 | -0.889298 |
| H                                            | -1.787897 | -0.718012 | 0.889296  |
| H                                            | -1.173283 | 1.541944  | -0.884494 |
| H                                            | -1.173283 | 1.541943  | 0.884496  |
| H                                            | 1.173267  | 1.541957  | -0.884494 |
| H                                            | 1.173267  | 1.541956  | 0.884495  |
| 24                                           |           |           |           |
| A0 SCF Done: -518.876154486 A.U.             |           |           |           |
| C                                            | -3.042623 | 0.929284  | -0.908120 |
| C                                            | -1.912948 | 1.276794  | -0.166283 |
| C                                            | -1.279956 | 0.296432  | 0.614863  |
| C                                            | -2.811156 | -1.294537 | -0.046215 |
| C                                            | -3.506514 | -0.387523 | -0.850829 |
| H                                            | -3.553771 | 1.675641  | -1.522285 |
| H                                            | -1.518818 | 2.295596  | -0.188358 |
| H                                            | -3.147350 | -2.336000 | 0.025156  |
| H                                            | -4.386882 | -0.707595 | -1.412847 |
| C                                            | -0.020552 | 0.610114  | 1.399267  |
| H                                            | -0.000016 | 1.678407  | 1.659318  |
| H                                            | -0.054053 | 0.033326  | 2.336985  |
| C                                            | 1.238386  | 0.249307  | 0.628392  |

|                                             |           |           |           |
|---------------------------------------------|-----------|-----------|-----------|
| C                                           | 2.092538  | 1.245100  | 0.131533  |
| C                                           | 1.554039  | -1.096579 | 0.373245  |
| C                                           | 3.239313  | 0.907803  | -0.597261 |
| H                                           | 1.859266  | 2.297251  | 0.319645  |
| C                                           | 2.697219  | -1.435839 | -0.354786 |
| H                                           | 0.884735  | -1.877483 | 0.743004  |
| C                                           | 3.545761  | -0.434031 | -0.842529 |
| H                                           | 3.895027  | 1.697945  | -0.973736 |
| H                                           | 2.928611  | -2.488161 | -0.542265 |
| H                                           | 4.441442  | -0.699567 | -1.410637 |
| N                                           | -1.729892 | -0.966758 | 0.668337  |
| 14                                          |           |           |           |
| <i>n</i> -BuH SCF Done: -158.530047497 A.U. |           |           |           |
| C                                           | 1.959648  | 0.120058  | -0.000001 |
| H                                           | 2.755434  | -0.643577 | -0.000003 |
| H                                           | 2.109231  | 0.756778  | -0.889332 |
| H                                           | 2.109235  | 0.756778  | 0.889328  |
| C                                           | 0.568506  | -0.513047 | 0.000002  |
| H                                           | 0.461278  | -1.171432 | -0.882237 |
| H                                           | 0.461280  | -1.171429 | 0.882243  |
| C                                           | -0.568507 | 0.513047  | 0.000002  |
| H                                           | -0.461280 | 1.171429  | 0.882243  |
| H                                           | -0.461278 | 1.171431  | -0.882237 |
| C                                           | -1.959648 | -0.120058 | -0.000001 |
| H                                           | -2.109235 | -0.756777 | 0.889329  |
| H                                           | -2.755434 | 0.643577  | -0.000004 |
| H                                           | -2.109230 | -0.756779 | -0.889331 |
| 38                                          |           |           |           |
| TS-A0A SCF Done: -684.310742454 A.U.        |           |           |           |
| Li                                          | -0.729333 | -2.547494 | -0.797424 |
| C                                           | 4.904664  | -1.959246 | 0.050030  |
| H                                           | 5.747681  | -2.358844 | 0.638803  |
| H                                           | 5.015245  | -2.332538 | -0.983291 |
| H                                           | 5.014517  | -0.861324 | 0.014591  |
| C                                           | 3.552434  | -2.359248 | 0.642179  |
| H                                           | 3.481836  | -3.461940 | 0.698121  |
| H                                           | 3.483794  | -2.000718 | 1.686249  |
| C                                           | 2.348751  | -1.818681 | -0.143977 |
| H                                           | 2.431821  | -2.172721 | -1.192241 |
| H                                           | 2.446011  | -0.716909 | -0.208827 |
| C                                           | 0.967335  | -2.168239 | 0.413752  |
| H                                           | 0.889436  | -1.846894 | 1.471033  |
| H                                           | 0.849334  | -3.278899 | 0.441458  |
| C                                           | -4.086219 | 0.392695  | 0.576049  |
| C                                           | -2.787133 | 0.744451  | 0.230733  |
| C                                           | -1.930997 | -0.215608 | -0.352628 |
| C                                           | -3.631858 | -1.822499 | -0.204140 |
| C                                           | -4.531998 | -0.919942 | 0.350801  |
| H                                           | -4.759887 | 1.138803  | 1.006885  |
| H                                           | -2.429636 | 1.763981  | 0.379860  |
| H                                           | -3.926429 | -2.862309 | -0.384754 |
| H                                           | -5.546544 | -1.233072 | 0.604537  |
| C                                           | -0.537406 | 0.016919  | -0.784418 |
| H                                           | 0.119584  | -1.018136 | -0.235299 |
| H                                           | -0.436314 | -0.203293 | -1.861524 |
| C                                           | 0.184431  | 1.254686  | -0.410021 |

|                                     |           |           |           |
|-------------------------------------|-----------|-----------|-----------|
| C                                   | 0.244508  | 1.693281  | 0.933439  |
| C                                   | 0.928841  | 1.986795  | -1.361214 |
| C                                   | 0.995536  | 2.812166  | 1.299890  |
| H                                   | -0.297925 | 1.135259  | 1.701562  |
| C                                   | 1.687937  | 3.100518  | -0.993583 |
| H                                   | 0.909866  | 1.668705  | -2.408220 |
| C                                   | 1.724562  | 3.525948  | 0.340038  |
| H                                   | 1.021165  | 3.124394  | 2.348243  |
| H                                   | 2.252558  | 3.644663  | -1.756661 |
| H                                   | 2.315733  | 4.399215  | 0.628319  |
| N                                   | -2.370597 | -1.495558 | -0.531167 |
| 24                                  |           |           |           |
| A SCF Done: -525.827147397 A.U.     |           |           |           |
| C                                   | 2.812745  | 1.527791  | 0.388269  |
| C                                   | 1.517823  | 1.050237  | 0.332805  |
| C                                   | 1.276660  | -0.338554 | 0.066287  |
| C                                   | 3.612376  | -0.661625 | -0.139258 |
| C                                   | 3.905798  | 0.662629  | 0.158141  |
| H                                   | 2.989739  | 2.580338  | 0.630342  |
| H                                   | 0.679876  | 1.710622  | 0.554006  |
| H                                   | 4.418367  | -1.372818 | -0.357792 |
| H                                   | 4.938322  | 1.013512  | 0.199876  |
| C                                   | 0.006995  | -0.993712 | 0.040856  |
| H                                   | 0.040746  | -2.045957 | 0.363470  |
| C                                   | -1.322510 | -0.410711 | 0.016511  |
| C                                   | -2.430397 | -1.164644 | 0.495704  |
| C                                   | -1.626602 | 0.873757  | -0.513093 |
| C                                   | -3.732692 | -0.669315 | 0.464486  |
| H                                   | -2.247844 | -2.163466 | 0.905366  |
| C                                   | -2.932144 | 1.368583  | -0.535047 |
| H                                   | -0.829755 | 1.482722  | -0.944215 |
| C                                   | -4.001862 | 0.609300  | -0.044525 |
| H                                   | -4.550518 | -1.287063 | 0.848760  |
| H                                   | -3.117180 | 2.362633  | -0.954468 |
| H                                   | -5.022105 | 1.001078  | -0.063719 |
| N                                   | 2.365953  | -1.151685 | -0.203347 |
| Li                                  | 1.207176  | -2.114075 | -1.381674 |
| 27                                  |           |           |           |
| TS-AB SCF Done: -710.566661346 A.U. |           |           |           |
| C                                   | -1.087275 | -0.482041 | 0.343649  |
| C                                   | -1.141932 | -1.814030 | -0.188312 |
| C                                   | -2.352003 | -2.455771 | -0.361236 |
| C                                   | -3.556168 | -1.803594 | -0.020217 |
| C                                   | -3.447304 | -0.519686 | 0.497443  |
| N                                   | -2.285866 | 0.131481  | 0.674564  |
| H                                   | -2.370842 | -3.478148 | -0.750788 |
| H                                   | -0.215577 | -2.338523 | -0.415760 |
| H                                   | -4.530781 | -2.277715 | -0.146076 |
| H                                   | -4.352538 | 0.030720  | 0.785245  |
| C                                   | 0.104742  | 0.247279  | 0.600706  |
| H                                   | -0.018350 | 1.075448  | 1.309438  |
| N                                   | -0.047704 | 1.841232  | -1.401686 |
| N                                   | -0.750526 | 2.649940  | -1.009830 |
| O                                   | -1.486556 | 3.196669  | -0.193306 |
| C                                   | 1.488746  | -0.108029 | 0.343393  |
| C                                   | 2.505172  | 0.431863  | 1.178644  |

|                                      |           |           |           |
|--------------------------------------|-----------|-----------|-----------|
| C                                    | 1.931361  | -0.915393 | -0.739117 |
| C                                    | 3.856163  | 0.159560  | 0.970277  |
| H                                    | 2.211896  | 1.075535  | 2.014139  |
| C                                    | 3.284898  | -1.191505 | -0.939983 |
| H                                    | 1.207426  | -1.297134 | -1.460370 |
| C                                    | 4.263590  | -0.665572 | -0.087164 |
| H                                    | 4.601859  | 0.593113  | 1.643879  |
| H                                    | 3.580943  | -1.815743 | -1.788857 |
| H                                    | 5.322243  | -0.884006 | -0.249689 |
| Li                                   | -2.351701 | 2.028682  | 1.058483  |
| 27                                   |           |           |           |
| TS-AB1 SCF Done: -710.572093865 A.U. |           |           |           |
| C                                    | -1.261142 | -0.344339 | 0.413993  |
| C                                    | -1.428542 | -1.580945 | -0.284346 |
| C                                    | -2.695691 | -2.055767 | -0.570342 |
| C                                    | -3.831204 | -1.318368 | -0.180521 |
| C                                    | -3.608812 | -0.123693 | 0.493736  |
| N                                    | -2.390207 | 0.358510  | 0.780901  |
| H                                    | -2.811591 | -3.013306 | -1.086722 |
| H                                    | -0.553196 | -2.171486 | -0.551348 |
| H                                    | -4.845395 | -1.663109 | -0.388867 |
| H                                    | -4.457328 | 0.490886  | 0.818178  |
| C                                    | -0.006759 | 0.222707  | 0.804579  |
| H                                    | -0.066893 | 0.890138  | 1.673662  |
| N                                    | 0.037587  | 2.137399  | -0.837640 |
| N                                    | 0.859437  | 1.953111  | -1.609052 |
| O                                    | -0.861297 | 2.836671  | -0.353233 |
| C                                    | 1.330560  | -0.220380 | 0.484414  |
| C                                    | 1.689696  | -0.820016 | -0.752170 |
| C                                    | 2.394142  | 0.046542  | 1.390653  |
| C                                    | 3.012040  | -1.177310 | -1.032959 |
| H                                    | 0.927590  | -0.988499 | -1.513442 |
| C                                    | 3.709901  | -0.304000 | 1.103437  |
| H                                    | 2.162924  | 0.532632  | 2.343717  |
| C                                    | 4.032929  | -0.931436 | -0.110487 |
| H                                    | 3.246349  | -1.642441 | -1.995301 |
| H                                    | 4.496302  | -0.091214 | 1.833920  |
| H                                    | 5.065614  | -1.211928 | -0.333774 |
| Li                                   | -1.948145 | 2.224619  | 1.042158  |
| 27                                   |           |           |           |
| TS-AB2 SCF Done: -710.538731956 A.U. |           |           |           |
| C                                    | 0.783185  | 0.496773  | -0.009337 |
| C                                    | 0.705876  | 1.928714  | 0.224570  |
| C                                    | 1.834438  | 2.694177  | 0.324147  |
| C                                    | 3.130675  | 2.104037  | 0.196480  |
| C                                    | 3.192020  | 0.749898  | 0.009597  |
| N                                    | 2.083017  | -0.043603 | -0.029056 |
| H                                    | 1.742676  | 3.769852  | 0.498241  |
| H                                    | -0.274022 | 2.388754  | 0.329987  |
| H                                    | 4.042502  | 2.699258  | 0.258216  |
| H                                    | 4.142067  | 0.218665  | -0.098185 |
| N                                    | 2.461471  | -1.483259 | -1.149967 |
| N                                    | 2.285721  | -2.493951 | -0.543572 |
| O                                    | 1.857837  | -2.726305 | 0.619243  |
| C                                    | -0.289665 | -0.389226 | -0.084716 |
| C                                    | -1.732229 | -0.139113 | -0.068614 |

|                                     |           |           |           |
|-------------------------------------|-----------|-----------|-----------|
| C                                   | -2.584280 | -1.199538 | 0.334082  |
| C                                   | -2.361945 | 1.061317  | -0.476556 |
| C                                   | -3.970602 | -1.058633 | 0.364171  |
| H                                   | -2.134558 | -2.151021 | 0.634514  |
| C                                   | -3.752310 | 1.201902  | -0.441572 |
| H                                   | -1.765982 | 1.885376  | -0.869542 |
| C                                   | -4.569389 | 0.150401  | -0.014381 |
| H                                   | -4.591076 | -1.899692 | 0.687149  |
| H                                   | -4.201477 | 2.144248  | -0.768752 |
| H                                   | -5.656123 | 0.265058  | 0.011081  |
| H                                   | -0.038577 | -1.438887 | -0.266343 |
| Li                                  | 1.248593  | -1.176580 | 1.513541  |
| 27                                  |           |           |           |
| B SCF Done: -710.610038845 A.U.     |           |           |           |
| C                                   | -1.798923 | -2.341085 | -1.011814 |
| C                                   | -0.821667 | -1.359711 | -0.860426 |
| C                                   | -1.043791 | -0.294125 | 0.025616  |
| C                                   | -3.136666 | -1.146104 | 0.572094  |
| C                                   | -2.982150 | -2.241927 | -0.273375 |
| H                                   | -1.638426 | -3.177666 | -1.696741 |
| H                                   | 0.116252  | -1.414235 | -1.414620 |
| H                                   | -4.053893 | -1.020829 | 1.157055  |
| H                                   | -3.772138 | -2.991251 | -0.353385 |
| C                                   | -0.010823 | 0.816058  | 0.197782  |
| H                                   | -0.183209 | 1.271269  | 1.188154  |
| C                                   | 1.414793  | 0.279763  | 0.171891  |
| C                                   | 2.279164  | 0.491404  | -0.911198 |
| C                                   | 1.875939  | -0.468946 | 1.267926  |
| C                                   | 3.575128  | -0.038843 | -0.899811 |
| H                                   | 1.926433  | 1.080079  | -1.758704 |
| C                                   | 3.168189  | -0.999117 | 1.280659  |
| H                                   | 1.210806  | -0.638770 | 2.120264  |
| C                                   | 4.024200  | -0.786000 | 0.193006  |
| H                                   | 4.237559  | 0.135861  | -1.752344 |
| H                                   | 3.510601  | -1.577340 | 2.143376  |
| H                                   | 5.037006  | -1.197935 | 0.200870  |
| N                                   | -2.200068 | -0.193084 | 0.715786  |
| N                                   | -1.033184 | 2.760555  | -0.682338 |
| N                                   | -0.199496 | 1.831407  | -0.867639 |
| O                                   | -1.735591 | 2.798137  | 0.412095  |
| Li                                  | -2.579130 | 1.628457  | 1.398185  |
| 40                                  |           |           |           |
| B-THF SCF Done: -943.194534791 A.U. |           |           |           |
| C                                   | 1.709397  | 3.281337  | -1.118799 |
| C                                   | 1.735149  | 2.081793  | -0.410135 |
| C                                   | 0.524669  | 1.467053  | -0.055146 |
| C                                   | -0.682216 | 3.176504  | -1.060842 |
| C                                   | 0.474782  | 3.842485  | -1.460570 |
| H                                   | 2.642594  | 3.773576  | -1.404796 |
| H                                   | 2.680842  | 1.612356  | -0.135038 |
| H                                   | -1.670300 | 3.584660  | -1.298373 |
| H                                   | 0.406757  | 4.777093  | -2.020912 |
| C                                   | 0.500117  | 0.177426  | 0.757618  |
| H                                   | -0.489142 | -0.282658 | 0.607895  |
| C                                   | 1.543566  | -0.823049 | 0.283621  |
| C                                   | 2.720148  | -1.081624 | 1.000078  |

|    |           |           |           |
|----|-----------|-----------|-----------|
| C  | 1.322665  | -1.507536 | -0.923931 |
| C  | 3.658576  | -2.000926 | 0.515557  |
| H  | 2.885844  | -0.560390 | 1.943637  |
| C  | 2.257755  | -2.425409 | -1.408615 |
| H  | 0.406085  | -1.314600 | -1.489419 |
| C  | 3.432602  | -2.674808 | -0.688534 |
| H  | 4.571880  | -2.192333 | 1.086007  |
| H  | 2.068016  | -2.950847 | -2.348689 |
| H  | 4.165685  | -3.393943 | -1.063941 |
| N  | -0.661995 | 2.024253  | -0.372629 |
| N  | -0.307673 | 0.832248  | 2.879652  |
| N  | 0.701448  | 0.507478  | 2.190212  |
| O  | -1.481587 | 0.891503  | 2.328912  |
| Li | -2.159192 | 1.202754  | 0.697395  |
| C  | -3.183265 | -1.465647 | 0.699796  |
| O  | -3.000762 | -0.287756 | -0.119742 |
| C  | -2.719402 | -0.671254 | -1.487847 |
| C  | -2.737226 | -2.203523 | -1.508084 |
| C  | -2.442790 | -2.566733 | -0.046245 |
| H  | -2.780122 | -1.241259 | 1.698171  |
| H  | -4.262979 | -1.686583 | 0.784292  |
| H  | -3.476464 | -0.221772 | -2.150402 |
| H  | -1.733020 | -0.260778 | -1.760753 |
| H  | -3.734190 | -2.572769 | -1.797756 |
| H  | -2.002938 | -2.615774 | -2.215706 |
| H  | -2.790067 | -3.572475 | 0.231914  |
| H  | -1.361741 | -2.504125 | 0.160143  |

53

B-THF2 SCF Done: -1175.77377089 A.U.

|    |           |           |           |
|----|-----------|-----------|-----------|
| C  | -1.468024 | -3.620503 | -1.288257 |
| C  | -1.879696 | -2.573335 | -0.465939 |
| C  | -1.005023 | -1.500899 | -0.229730 |
| C  | 0.620325  | -2.481405 | -1.563011 |
| C  | -0.190768 | -3.576569 | -1.856854 |
| H  | -2.136247 | -4.462966 | -1.485399 |
| H  | -2.871082 | -2.574010 | -0.010108 |
| H  | 1.633839  | -2.409577 | -1.971895 |
| H  | 0.172595  | -4.373534 | -2.508949 |
| C  | -1.383688 | -0.357661 | 0.703866  |
| H  | -0.716129 | 0.482913  | 0.463110  |
| C  | -2.817645 | 0.107323  | 0.496999  |
| C  | -3.848513 | -0.213592 | 1.391402  |
| C  | -3.125587 | 0.877151  | -0.638074 |
| C  | -5.158070 | 0.220626  | 1.153087  |
| H  | -3.607724 | -0.800204 | 2.278632  |
| C  | -4.431673 | 1.311984  | -0.877572 |
| H  | -2.329803 | 1.136996  | -1.341803 |
| C  | -5.455399 | 0.983250  | 0.019393  |
| H  | -5.950753 | -0.038391 | 1.860786  |
| H  | -4.651155 | 1.912437  | -1.764833 |
| H  | -6.478282 | 1.323415  | -0.163859 |
| N  | 0.227597  | -1.472325 | -0.772073 |
| N  | -0.020814 | -0.667571 | 2.610439  |
| N  | -1.175464 | -0.794168 | 2.107432  |
| O  | 0.953678  | -0.194974 | 1.900469  |
| Li | 1.504382  | -0.162025 | 0.137940  |
| C  | 1.100540  | 2.713208  | 0.336257  |

|   |           |           |           |
|---|-----------|-----------|-----------|
| O | 1.291215  | 1.632371  | -0.598036 |
| C | 0.618405  | 1.920162  | -1.841752 |
| C | -0.062228 | 3.282225  | -1.652242 |
| C | -0.179538 | 3.397811  | -0.125663 |
| H | 1.044463  | 2.274267  | 1.343086  |
| H | 1.967554  | 3.398490  | 0.286831  |
| H | 1.356353  | 1.920424  | -2.661018 |
| H | -0.104502 | 1.110105  | -2.033315 |
| H | 0.576926  | 4.088850  | -2.046063 |
| H | -1.032468 | 3.336074  | -2.167739 |
| H | -0.255243 | 4.436639  | 0.227711  |
| H | -1.059327 | 2.844033  | 0.239824  |
| C | 4.065022  | -0.869519 | 1.234159  |
| O | 3.379236  | -0.582932 | -0.004589 |
| C | 4.245518  | 0.150723  | -0.898355 |
| C | 5.597730  | 0.245520  | -0.186348 |
| C | 5.196294  | 0.148994  | 1.291402  |
| H | 3.328847  | -0.783695 | 2.046633  |
| H | 4.455096  | -1.904040 | 1.203847  |
| H | 4.299496  | -0.380158 | -1.863131 |
| H | 3.796274  | 1.143155  | -1.071095 |
| H | 6.239091  | -0.608168 | -0.460743 |
| H | 6.136361  | 1.171242  | -0.437411 |
| H | 6.018722  | -0.166801 | 1.950229  |
| H | 4.813794  | 1.118346  | 1.652907  |

27

B1 SCF Done: -710.576631467 A.U.

|    |           |           |           |
|----|-----------|-----------|-----------|
| C  | 1.204964  | -0.234988 | -0.224727 |
| C  | 1.100324  | -1.565758 | 0.212854  |
| C  | 2.251930  | -2.338025 | 0.363725  |
| C  | 3.496343  | -1.774251 | 0.076501  |
| C  | 3.523074  | -0.449482 | -0.356330 |
| N  | 2.420051  | 0.297250  | -0.506277 |
| H  | 2.173577  | -3.375218 | 0.699676  |
| H  | 0.123813  | -2.000191 | 0.419480  |
| H  | 4.423527  | -2.341230 | 0.178537  |
| H  | 4.475888  | 0.034895  | -0.596224 |
| C  | 0.007259  | 0.662163  | -0.440763 |
| H  | 0.094802  | 1.113831  | -1.435630 |
| N  | 0.161930  | 1.975039  | 0.541492  |
| N  | -0.383679 | 2.105780  | 1.585775  |
| O  | 0.995332  | 2.827865  | -0.074573 |
| C  | -1.354868 | 0.066179  | -0.276842 |
| C  | -1.805186 | -0.434151 | 0.959771  |
| C  | -2.238908 | 0.050323  | -1.369070 |
| C  | -3.099999 | -0.945393 | 1.089611  |
| H  | -1.139019 | -0.415610 | 1.821627  |
| C  | -3.531957 | -0.464998 | -1.241073 |
| H  | -1.906836 | 0.447888  | -2.332655 |
| C  | -3.966613 | -0.964785 | -0.008685 |
| H  | -3.434220 | -1.331202 | 2.056674  |
| H  | -4.202082 | -0.472678 | -2.105017 |
| H  | -4.977911 | -1.367324 | 0.095855  |
| Li | 2.499840  | 2.265475  | -0.754166 |

53

B1-THF2 SCF Done: -1175.73952460 A.U.

|                                  |           |           |           |
|----------------------------------|-----------|-----------|-----------|
| C                                | 0.864368  | -1.306535 | 0.635032  |
| C                                | 1.575390  | -2.389362 | 1.184349  |
| C                                | 0.900135  | -3.328568 | 1.963368  |
| C                                | -0.472228 | -3.181090 | 2.183136  |
| C                                | -1.105849 | -2.078730 | 1.607314  |
| N                                | -0.462619 | -1.172100 | 0.866213  |
| H                                | 1.445613  | -4.170484 | 2.398072  |
| H                                | 2.646731  | -2.488391 | 1.016870  |
| H                                | -1.037448 | -3.894731 | 2.785942  |
| H                                | -2.180034 | -1.912508 | 1.745083  |
| C                                | 1.467429  | -0.244245 | -0.231449 |
| H                                | 0.978013  | 0.706889  | -0.000890 |
| N                                | 0.886215  | -0.536243 | -1.817103 |
| N                                | 1.523543  | -1.080735 | -2.653172 |
| O                                | -0.339282 | -0.048319 | -1.862323 |
| C                                | 2.945045  | -0.068422 | -0.267188 |
| C                                | 3.814349  | -1.066736 | -0.748983 |
| C                                | 3.500082  | 1.161346  | 0.134073  |
| C                                | 5.193834  | -0.841226 | -0.808070 |
| H                                | 3.405607  | -2.015433 | -1.093006 |
| C                                | 4.877789  | 1.384838  | 0.080504  |
| H                                | 2.836632  | 1.951801  | 0.496710  |
| C                                | 5.731579  | 0.380788  | -0.391792 |
| H                                | 5.853229  | -1.628285 | -1.184647 |
| H                                | 5.285779  | 2.346047  | 0.405148  |
| H                                | 6.810712  | 0.551692  | -0.436586 |
| Li                               | -1.414882 | 0.142094  | -0.375119 |
| C                                | -1.022214 | 2.260819  | 1.717815  |
| O                                | -1.281545 | 1.932798  | 0.338994  |
| C                                | -0.848129 | 3.001529  | -0.529189 |
| C                                | 0.039250  | 3.884926  | 0.341574  |
| C                                | -0.624186 | 3.736161  | 1.716940  |
| H                                | -1.925998 | 2.047684  | 2.310823  |
| H                                | -0.204727 | 1.618297  | 2.090873  |
| H                                | -0.334941 | 2.548442  | -1.390621 |
| H                                | -1.736147 | 3.551331  | -0.891397 |
| H                                | 1.067086  | 3.486630  | 0.365573  |
| H                                | 0.081928  | 4.923622  | -0.017313 |
| H                                | 0.038895  | 3.991004  | 2.556741  |
| H                                | -1.520242 | 4.375771  | 1.779110  |
| C                                | -4.330784 | 0.614089  | -0.067072 |
| O                                | -3.272732 | -0.316206 | -0.377523 |
| C                                | -3.801428 | -1.486863 | -1.035191 |
| C                                | -5.225103 | -1.110627 | -1.435492 |
| C                                | -5.626504 | -0.158987 | -0.301357 |
| H                                | -4.204339 | 0.962516  | 0.969785  |
| H                                | -4.250566 | 1.487013  | -0.739027 |
| H                                | -3.149558 | -1.736387 | -1.886383 |
| H                                | -3.788909 | -2.333729 | -0.325344 |
| H                                | -5.222138 | -0.577188 | -2.400427 |
| H                                | -5.881491 | -1.988287 | -1.527960 |
| H                                | -6.468097 | 0.501552  | -0.556691 |
| H                                | -5.899404 | -0.732420 | 0.600241  |
| 27                               |           |           |           |
| B2 SCF Done: -710.550072599 A.U. |           |           |           |
| C                                | 0.824951  | 0.353726  | -0.138452 |
| C                                | 0.821870  | 1.692710  | 0.412325  |



|    |           |           |           |
|----|-----------|-----------|-----------|
| C  | 1.962192  | 2.443972  | 0.519698  |
| C  | 3.215395  | 1.923294  | 0.089103  |
| C  | 3.237300  | 0.634698  | -0.370836 |
| N  | 2.111322  | -0.127117 | -0.442876 |
| H  | 1.906184  | 3.449173  | 0.945678  |
| H  | -0.124592 | 2.092387  | 0.769952  |
| H  | 4.135617  | 2.505284  | 0.138544  |
| H  | 4.146199  | 0.125058  | -0.695745 |
| N  | 2.333744  | -1.450415 | -0.997647 |
| N  | 2.185200  | -2.412214 | -0.186525 |
| O  | 1.813841  | -2.205087 | 1.019328  |
| C  | -0.287033 | -0.473310 | -0.298848 |
| C  | -1.713420 | -0.146901 | -0.185463 |
| C  | -2.622803 | -1.216265 | 0.026035  |
| C  | -2.275817 | 1.145597  | -0.321503 |
| C  | -3.996624 | -1.004635 | 0.131819  |
| H  | -2.229272 | -2.234534 | 0.107568  |
| C  | -3.653278 | 1.355561  | -0.210603 |
| H  | -1.637703 | 1.996914  | -0.560013 |
| C  | -4.525868 | 0.288278  | 0.025221  |
| H  | -4.661753 | -1.856848 | 0.298828  |
| H  | -4.048992 | 2.368836  | -0.326647 |
| H  | -5.602252 | 0.457888  | 0.110672  |
| H  | -0.092220 | -1.474923 | -0.690843 |
| Li | 0.455006  | -1.280221 | 1.688580  |

27

TS-BC SCF Done: -710.563522065 A.U.

|    |           |           |           |
|----|-----------|-----------|-----------|
| C  | 1.316261  | -0.055793 | 0.092048  |
| C  | 1.659526  | -1.132436 | 0.949391  |
| C  | 2.926641  | -1.692369 | 0.889407  |
| C  | 3.870790  | -1.176670 | -0.014592 |
| C  | 3.478463  | -0.110035 | -0.813104 |
| N  | 2.248640  | 0.432227  | -0.776405 |
| H  | 3.192090  | -2.517188 | 1.556535  |
| H  | 0.928519  | -1.491988 | 1.674881  |
| H  | 4.881224  | -1.583145 | -0.086288 |
| H  | 4.181259  | 0.334627  | -1.526654 |
| C  | 0.004952  | 0.603183  | 0.151398  |
| H  | -0.359897 | 1.494091  | 1.322753  |
| Li | 1.465439  | 1.866739  | -1.884373 |
| N  | 0.027165  | 1.884187  | -0.583289 |
| N  | -0.341018 | 2.879905  | 0.106701  |
| O  | -0.703065 | 2.589991  | 1.336863  |
| C  | -1.258642 | -0.168981 | -0.001414 |
| C  | -1.296355 | -1.579386 | -0.124167 |
| C  | -2.507999 | 0.501398  | -0.057520 |
| C  | -2.501145 | -2.273078 | -0.260077 |
| H  | -0.368032 | -2.151510 | -0.132871 |
| C  | -3.708674 | -0.195885 | -0.200671 |
| H  | -2.546604 | 1.588576  | 0.019295  |
| C  | -3.722592 | -1.592041 | -0.295290 |
| H  | -2.479049 | -3.363219 | -0.352534 |
| H  | -4.647834 | 0.364421  | -0.236068 |
| H  | -4.664336 | -2.136488 | -0.402352 |

40  
40

TS-BC-THF SCF Done: -943.147983944 A.U.

|    |           |           |           |
|----|-----------|-----------|-----------|
| C  | 0.941861  | 1.412637  | 0.321675  |
| C  | 1.929949  | 2.393100  | 0.599213  |
| C  | 1.645039  | 3.737917  | 0.418421  |
| C  | 0.368919  | 4.123075  | -0.026887 |
| C  | -0.558432 | 3.115345  | -0.261579 |
| N  | -0.291547 | 1.807766  | -0.104932 |
| H  | 2.405141  | 4.492329  | 0.640040  |
| H  | 2.901183  | 2.079845  | 0.984795  |
| H  | 0.102218  | 5.171377  | -0.173362 |
| H  | -1.571920 | 3.362802  | -0.597767 |
| C  | 1.175634  | -0.018653 | 0.548981  |
| H  | 1.205991  | -0.564748 | 1.959046  |
| Li | -1.479482 | 0.245936  | -0.477309 |
| N  | -0.089642 | -0.776667 | 0.471959  |
| N  | -0.337872 | -1.464205 | 1.503601  |
| O  | 0.582579  | -1.403639 | 2.443513  |
| C  | 2.342529  | -0.721941 | -0.050661 |
| C  | 3.326559  | -0.069156 | -0.832489 |
| C  | 2.500344  | -2.121998 | 0.118757  |
| C  | 4.410192  | -0.761695 | -1.378141 |
| H  | 3.239642  | 0.998275  | -1.038352 |
| C  | 3.580566  | -2.810917 | -0.434903 |
| H  | 1.770814  | -2.684117 | 0.702961  |
| C  | 4.554330  | -2.139386 | -1.183065 |
| H  | 5.144553  | -0.213485 | -1.976228 |
| H  | 3.661748  | -3.890251 | -0.274427 |
| H  | 5.402340  | -2.679766 | -1.611667 |
| C  | -4.260871 | -0.144943 | -1.529447 |
| O  | -3.295177 | -0.193216 | -0.449606 |
| C  | -3.844467 | -0.909133 | 0.687185  |
| C  | -5.031923 | -1.677424 | 0.123205  |
| C  | -5.554683 | -0.705000 | -0.941647 |
| H  | -4.350767 | 0.895413  | -1.879836 |
| H  | -3.887310 | -0.767082 | -2.361431 |
| H  | -3.051440 | -1.541868 | 1.112711  |
| H  | -4.160925 | -0.175610 | 1.450159  |
| H  | -4.692383 | -2.616837 | -0.343480 |
| H  | -5.775163 | -1.922747 | 0.895741  |
| H  | -6.182950 | -1.185106 | -1.705907 |
| H  | -6.141403 | 0.099382  | -0.468428 |

53

TS-BC-THF2 SCF Done: -1175.73272690 A.U.

|    |           |          |           |
|----|-----------|----------|-----------|
| C  | 1.179538  | 1.842013 | 0.322786  |
| C  | 2.339998  | 2.630929 | 0.120595  |
| C  | 2.263767  | 3.798263 | -0.626453 |
| C  | 1.028685  | 4.196410 | -1.162926 |
| C  | -0.072223 | 3.382945 | -0.912556 |
| N  | -0.007490 | 2.243592 | -0.208173 |
| H  | 3.157234  | 4.410520 | -0.778308 |
| H  | 3.281317  | 2.325701 | 0.580629  |
| H  | 0.923569  | 5.112753 | -1.746921 |
| H  | -1.060052 | 3.651246 | -1.305052 |
| C  | 1.199946  | 0.617121 | 1.137308  |
| H  | 1.353790  | 0.706300 | 2.636055  |
| Li | -1.340655 | 0.701505 | -0.058835 |
| N  | -0.174253 | 0.190040 | 1.480279  |

|                                      |           |           |           |
|--------------------------------------|-----------|-----------|-----------|
| N                                    | -0.374251 | 0.067286  | 2.718673  |
| O                                    | 0.675001  | 0.315340  | 3.481015  |
| C                                    | 2.101911  | -0.511900 | 0.798061  |
| C                                    | 3.063701  | -0.459453 | -0.240956 |
| C                                    | 1.999532  | -1.742346 | 1.498155  |
| C                                    | 3.872259  | -1.555646 | -0.550151 |
| H                                    | 3.170784  | 0.446579  | -0.838226 |
| C                                    | 2.805995  | -2.836614 | 1.182120  |
| H                                    | 1.275736  | -1.844884 | 2.307844  |
| C                                    | 3.754912  | -2.758253 | 0.155758  |
| H                                    | 4.595518  | -1.468725 | -1.366750 |
| H                                    | 2.688457  | -3.765527 | 1.748315  |
| H                                    | 4.385533  | -3.616248 | -0.090718 |
| C                                    | -4.090833 | 0.191827  | -0.874380 |
| O                                    | -3.229706 | 0.602139  | 0.213941  |
| C                                    | -3.743236 | 0.079083  | 1.454744  |
| C                                    | -4.422634 | -1.221239 | 1.050295  |
| C                                    | -5.082021 | -0.823730 | -0.279311 |
| H                                    | -4.596182 | 1.078413  | -1.292817 |
| H                                    | -3.448127 | -0.244391 | -1.654952 |
| H                                    | -2.900868 | -0.038643 | 2.151107  |
| H                                    | -4.467411 | 0.794884  | 1.888058  |
| H                                    | -3.662168 | -2.003988 | 0.893027  |
| H                                    | -5.140569 | -1.580264 | 1.802347  |
| H                                    | -5.251644 | -1.678068 | -0.950857 |
| H                                    | -6.055550 | -0.344396 | -0.089744 |
| C                                    | -0.966255 | -1.961516 | -1.109457 |
| O                                    | -0.925016 | -0.560469 | -1.460000 |
| C                                    | 0.043906  | -0.329968 | -2.505294 |
| C                                    | 0.395095  | -1.714102 | -3.043580 |
| C                                    | 0.248397  | -2.585840 | -1.790193 |
| H                                    | -0.944475 | -2.047988 | -0.012421 |
| H                                    | -1.912936 | -2.392366 | -1.482988 |
| H                                    | -0.404063 | 0.340043  | -3.255870 |
| H                                    | 0.926689  | 0.168011  | -2.071199 |
| H                                    | -0.327145 | -2.022670 | -3.817731 |
| H                                    | 1.404732  | -1.745399 | -3.479075 |
| H                                    | 0.100779  | -3.653127 | -2.011377 |
| H                                    | 1.136102  | -2.482680 | -1.148361 |
| 27                                   |           |           |           |
| TS-B1C SCF Done: -710.520948952 A.U. |           |           |           |
| C                                    | -1.159796 | -0.259869 | 0.091820  |
| C                                    | -0.981032 | -1.654935 | -0.054037 |
| C                                    | -2.084945 | -2.474437 | -0.252133 |
| C                                    | -3.365601 | -1.907094 | -0.313661 |
| C                                    | -3.466436 | -0.528368 | -0.163543 |
| N                                    | -2.410251 | 0.277072  | 0.039523  |
| H                                    | -1.948985 | -3.552658 | -0.372524 |
| H                                    | 0.022851  | -2.077918 | -0.019760 |
| H                                    | -4.257822 | -2.514033 | -0.477373 |
| H                                    | -4.446062 | -0.039147 | -0.204852 |
| C                                    | -0.020355 | 0.645820  | 0.363470  |
| H                                    | -0.417371 | 1.450971  | 1.394548  |
| N                                    | -0.259168 | 1.995706  | -0.270513 |
| N                                    | -0.078505 | 2.568382  | -1.257467 |
| O                                    | -0.931795 | 2.587384  | 1.106698  |
| C                                    | 1.368070  | 0.128376  | 0.171259  |

|    |           |           |           |
|----|-----------|-----------|-----------|
| C  | 1.998748  | -0.527517 | 1.245209  |
| C  | 2.069080  | 0.247558  | -1.043544 |
| C  | 3.285089  | -1.056381 | 1.108996  |
| H  | 1.467857  | -0.618501 | 2.196784  |
| C  | 3.364635  | -0.262617 | -1.172566 |
| H  | 1.595450  | 0.748161  | -1.890033 |
| C  | 3.976478  | -0.920891 | -0.100335 |
| H  | 3.754842  | -1.565050 | 1.955457  |
| H  | 3.895605  | -0.153230 | -2.122442 |
| H  | 4.987261  | -1.324208 | -0.205474 |
| Li | -2.622470 | 2.160182  | 0.675227  |

53

TS-B1C-THF2 SCF Done: -1175.68367864 A.U.

|    |           |           |           |
|----|-----------|-----------|-----------|
| C  | -1.382650 | -0.867350 | 0.833973  |
| C  | -2.288393 | -1.574409 | 1.661019  |
| C  | -1.817882 | -2.235694 | 2.788787  |
| C  | -0.451628 | -2.187328 | 3.101198  |
| C  | 0.376270  | -1.465908 | 2.245026  |
| N  | -0.060846 | -0.831487 | 1.148823  |
| H  | -2.515563 | -2.777808 | 3.433337  |
| H  | -3.350313 | -1.589877 | 1.415366  |
| H  | -0.043380 | -2.686595 | 3.981943  |
| H  | 1.451371  | -1.391370 | 2.447158  |
| C  | -1.806386 | -0.197227 | -0.412009 |
| H  | -0.894510 | -0.575691 | -1.384003 |
| N  | -0.933922 | 1.015468  | -0.691292 |
| N  | -0.893843 | 2.148995  | -0.417329 |
| O  | 0.045718  | 0.242830  | -1.601628 |
| C  | -3.259203 | 0.016628  | -0.668170 |
| C  | -4.023846 | -1.052074 | -1.178158 |
| C  | -3.913438 | 1.238573  | -0.417462 |
| C  | -5.392570 | -0.910449 | -1.418752 |
| H  | -3.528538 | -2.003717 | -1.390263 |
| C  | -5.279382 | 1.386140  | -0.679471 |
| H  | -3.340817 | 2.076835  | -0.017098 |
| C  | -6.027657 | 0.313374  | -1.175389 |
| H  | -5.963886 | -1.756260 | -1.811817 |
| H  | -5.764679 | 2.346675  | -0.483200 |
| H  | -7.096582 | 0.429835  | -1.373708 |
| Li | 1.307420  | -0.157125 | -0.242253 |
| C  | 1.739557  | 2.138595  | 1.633318  |
| O  | 2.256651  | 1.325144  | 0.558946  |
| C  | 2.995087  | 2.137761  | -0.378256 |
| C  | 3.191437  | 3.482372  | 0.317649  |
| C  | 1.920113  | 3.580777  | 1.169970  |
| H  | 0.690247  | 1.861201  | 1.810538  |
| H  | 2.320730  | 1.926215  | 2.549324  |
| H  | 3.937973  | 1.623536  | -0.623752 |
| H  | 2.399606  | 2.243648  | -1.302009 |
| H  | 4.086600  | 3.455447  | 0.961417  |
| H  | 3.306371  | 4.309558  | -0.398238 |
| H  | 2.005595  | 4.285571  | 2.010224  |
| H  | 1.063689  | 3.877656  | 0.544535  |
| C  | 3.069737  | -1.617070 | -2.128140 |
| O  | 2.743750  | -1.309665 | -0.755641 |
| C  | 3.894986  | -1.495097 | 0.092864  |
| C  | 5.080339  | -1.610211 | -0.861319 |

|                                      |           |           |           |
|--------------------------------------|-----------|-----------|-----------|
| C                                    | 4.437794  | -2.293341 | -2.075092 |
| H                                    | 2.274707  | -2.253410 | -2.546742 |
| H                                    | 3.104038  | -0.676761 | -2.706686 |
| H                                    | 3.956113  | -0.639358 | 0.782386  |
| H                                    | 3.760632  | -2.419097 | 0.684267  |
| H                                    | 5.448208  | -0.607649 | -1.136570 |
| H                                    | 5.916661  | -2.177152 | -0.426794 |
| H                                    | 5.005901  | -2.161314 | -3.007584 |
| H                                    | 4.325180  | -3.374409 | -1.889623 |
| 27                                   |           |           |           |
| C SCF Done: -710.623929273 A.U.      |           |           |           |
| C                                    | -1.763526 | -2.820942 | -0.298197 |
| C                                    | -0.683957 | -1.944982 | -0.358096 |
| C                                    | -0.919759 | -0.558102 | -0.276778 |
| C                                    | -3.207253 | -0.924634 | -0.108761 |
| C                                    | -3.058875 | -2.308223 | -0.171578 |
| H                                    | -1.594790 | -3.898762 | -0.364046 |
| H                                    | 0.330135  | -2.322914 | -0.486577 |
| H                                    | -4.203494 | -0.478958 | -0.011628 |
| H                                    | -3.933322 | -2.959501 | -0.125219 |
| C                                    | 0.187453  | 0.408412  | -0.364959 |
| C                                    | 1.617637  | 0.159854  | -0.065944 |
| C                                    | 2.627881  | 0.827497  | -0.785997 |
| C                                    | 1.993550  | -0.721510 | 0.966966  |
| C                                    | 3.974276  | 0.616156  | -0.483490 |
| H                                    | 2.357646  | 1.514157  | -1.592690 |
| C                                    | 3.342496  | -0.939584 | 1.254741  |
| H                                    | 1.227072  | -1.227540 | 1.557235  |
| C                                    | 4.339015  | -0.272868 | 0.533417  |
| H                                    | 4.743530  | 1.143571  | -1.053669 |
| H                                    | 3.615188  | -1.627162 | 2.059709  |
| H                                    | 5.393615  | -0.442633 | 0.764717  |
| N                                    | -2.174526 | -0.068716 | -0.148836 |
| N                                    | -0.419858 | 2.660287  | -1.113693 |
| N                                    | -0.136273 | 1.614775  | -0.761660 |
| Li                                   | -2.837576 | 1.772504  | 0.380508  |
| O                                    | -3.409613 | 2.861763  | 1.400964  |
| H                                    | -3.724983 | 3.517254  | 2.024306  |
| 53                                   |           |           |           |
| C-THF2 SCF Done: -1175.77102150 A.U. |           |           |           |
| C                                    | 1.618306  | 2.737042  | 2.433150  |
| C                                    | 2.263576  | 1.712703  | 1.747468  |
| C                                    | 1.489251  | 0.735430  | 1.087412  |
| C                                    | -0.468505 | 1.762265  | 1.781586  |
| C                                    | 0.219480  | 2.764688  | 2.464140  |
| H                                    | 2.203203  | 3.499074  | 2.954848  |
| H                                    | 3.351954  | 1.648286  | 1.739876  |
| H                                    | -1.562320 | 1.753839  | 1.752406  |
| H                                    | -0.326844 | 3.544931  | 2.997599  |
| C                                    | 2.127942  | -0.407743 | 0.411887  |
| C                                    | 3.465577  | -0.433997 | -0.216785 |
| C                                    | 4.210103  | -1.629231 | -0.294276 |
| C                                    | 4.014634  | 0.734315  | -0.784280 |
| C                                    | 5.460896  | -1.652418 | -0.913164 |
| H                                    | 3.808208  | -2.549694 | 0.137391  |
| C                                    | 5.272288  | 0.707169  | -1.390458 |

|                                     |           |           |           |
|-------------------------------------|-----------|-----------|-----------|
| H                                   | 3.446466  | 1.666266  | -0.765713 |
| C                                   | 6.003325  | -0.483867 | -1.459547 |
| H                                   | 6.019426  | -2.591108 | -0.960849 |
| H                                   | 5.677771  | 1.625087  | -1.824651 |
| H                                   | 6.985360  | -0.502347 | -1.938882 |
| N                                   | 0.140207  | 0.785067  | 1.095864  |
| N                                   | 0.882093  | -2.515611 | 0.416744  |
| N                                   | 1.443763  | -1.528344 | 0.407383  |
| Li                                  | -1.145556 | -0.176939 | -0.314212 |
| O                                   | -0.860961 | -0.642317 | -1.958956 |
| H                                   | -0.772849 | -0.293001 | -2.850783 |
| C                                   | -3.654622 | 0.694173  | -1.234578 |
| O                                   | -2.635303 | 1.284928  | -0.405504 |
| C                                   | -2.079509 | 2.347740  | -1.189395 |
| C                                   | -3.294145 | 3.030397  | -1.816884 |
| C                                   | -4.273271 | 1.853522  | -2.046368 |
| H                                   | -3.150875 | -0.038817 | -1.888917 |
| H                                   | -4.370853 | 0.183064  | -0.575850 |
| H                                   | -1.487284 | 2.997435  | -0.529009 |
| H                                   | -1.415192 | 1.904623  | -1.955291 |
| H                                   | -3.721277 | 3.759055  | -1.109900 |
| H                                   | -3.035890 | 3.566975  | -2.742122 |
| H                                   | -5.287389 | 2.103146  | -1.700103 |
| H                                   | -4.344344 | 1.582516  | -3.110737 |
| C                                   | -3.028098 | -1.497426 | 1.647480  |
| O                                   | -2.004007 | -1.650016 | 0.652791  |
| C                                   | -2.295256 | -2.769975 | -0.207862 |
| C                                   | -3.802904 | -2.957006 | -0.090290 |
| C                                   | -4.043312 | -2.620257 | 1.389233  |
| H                                   | -2.575794 | -1.553490 | 2.652564  |
| H                                   | -3.479432 | -0.496559 | 1.532756  |
| H                                   | -1.923057 | -2.491784 | -1.207014 |
| H                                   | -1.753906 | -3.662881 | 0.158057  |
| H                                   | -4.326011 | -2.239743 | -0.743333 |
| H                                   | -4.128262 | -3.972326 | -0.362871 |
| H                                   | -5.075635 | -2.308717 | 1.608719  |
| H                                   | -3.813291 | -3.496696 | 2.017073  |
| 27                                  |           |           |           |
| TS-CD SCF Done: -710.594298101 A.U. |           |           |           |
| C                                   | -1.628674 | -0.056607 | -0.080766 |
| C                                   | -1.936119 | -1.429993 | 0.073028  |
| C                                   | -3.255301 | -1.795513 | 0.310809  |
| C                                   | -4.257800 | -0.815390 | 0.392948  |
| C                                   | -3.884219 | 0.512889  | 0.208747  |
| N                                   | -2.615984 | 0.853156  | -0.022543 |
| H                                   | -3.508724 | -2.852347 | 0.426701  |
| H                                   | -1.161566 | -2.189849 | -0.014155 |
| H                                   | -5.300884 | -1.076425 | 0.580093  |
| H                                   | -4.615127 | 1.327411  | 0.238639  |
| C                                   | -0.306722 | 0.516727  | -0.357966 |
| N                                   | -0.467241 | 1.832972  | -0.539659 |
| N                                   | -1.376727 | 2.560620  | -0.489891 |
| C                                   | 1.016660  | -0.091125 | -0.465844 |
| C                                   | 1.372403  | -1.275063 | 0.223454  |
| C                                   | 2.021701  | 0.545365  | -1.238308 |
| C                                   | 2.661650  | -1.812538 | 0.115551  |
| H                                   | 0.655692  | -1.762616 | 0.883423  |

|    |          |           |           |
|----|----------|-----------|-----------|
| C  | 3.310482 | 0.014406  | -1.327327 |
| H  | 1.782968 | 1.469056  | -1.770035 |
| C  | 3.640679 | -1.175144 | -0.657943 |
| H  | 2.907648 | -2.722671 | 0.667711  |
| H  | 4.064825 | 0.534777  | -1.922187 |
| H  | 4.649024 | -1.588144 | -0.727314 |
| Li | 2.952454 | 0.442025  | 1.110639  |
| O  | 3.346406 | 1.275028  | 2.412722  |
| H  | 3.588765 | 1.779189  | 3.189790  |

53

TS-CD-THF2 SCF Done: -1175.75592189 A.U.

|    |           |           |           |
|----|-----------|-----------|-----------|
| C  | -1.230532 | -1.522696 | -0.941874 |
| C  | 0.090396  | -1.479991 | -1.453508 |
| C  | 0.828897  | -2.653591 | -1.482016 |
| C  | 0.272380  | -3.854570 | -1.003324 |
| C  | -1.035495 | -3.824225 | -0.530652 |
| N  | -1.742435 | -2.691639 | -0.517820 |
| H  | 1.846203  | -2.640434 | -1.879788 |
| H  | 0.510320  | -0.545620 | -1.819455 |
| H  | 0.835979  | -4.789174 | -1.011286 |
| H  | -1.537856 | -4.723512 | -0.160255 |
| C  | -2.158119 | -0.399996 | -0.846064 |
| N  | -3.323330 | -0.875836 | -0.398832 |
| N  | -3.676628 | -1.946910 | -0.071290 |
| C  | -1.938104 | 1.030138  | -1.084214 |
| C  | -0.710409 | 1.634528  | -0.752807 |
| C  | -2.972019 | 1.848966  | -1.583676 |
| C  | -0.511769 | 3.008670  | -0.909500 |
| H  | 0.083640  | 1.027299  | -0.317488 |
| C  | -2.774903 | 3.222283  | -1.742349 |
| H  | -3.933817 | 1.399558  | -1.845389 |
| C  | -1.545516 | 3.807715  | -1.410630 |
| H  | 0.448909  | 3.416701  | -0.569997 |
| H  | -3.589312 | 3.841085  | -2.129860 |
| H  | -1.401238 | 4.885027  | -1.531150 |
| Li | 1.827582  | 1.585091  | 1.272309  |
| O  | 2.214476  | 3.161238  | 0.789897  |
| H  | 2.214326  | 4.108096  | 0.952553  |
| C  | 3.325321  | -0.903773 | 0.397197  |
| O  | 2.536199  | 0.248292  | 0.040940  |
| C  | 3.106811  | 0.916735  | -1.112704 |
| C  | 4.532194  | 0.386006  | -1.203115 |
| C  | 4.361939  | -1.058665 | -0.716414 |
| H  | 3.806291  | -0.717855 | 1.374629  |
| H  | 2.662931  | -1.777004 | 0.499609  |
| H  | 2.518606  | 0.646459  | -2.009440 |
| H  | 3.023306  | 1.997670  | -0.916535 |
| H  | 4.947312  | 0.460242  | -2.219332 |
| H  | 5.190202  | 0.947572  | -0.518849 |
| H  | 3.961043  | -1.687134 | -1.528993 |
| H  | 5.294173  | -1.519507 | -0.357740 |
| C  | 0.326151  | -0.804255 | 2.266739  |
| O  | 0.490715  | 0.631500  | 2.255253  |
| C  | -0.655125 | 1.273719  | 2.852797  |
| C  | -1.352197 | 0.176084  | 3.648848  |
| C  | -1.093702 | -1.056305 | 2.773166  |
| H  | 0.499937  | -1.189750 | 1.252570  |

|                                      |           |           |           |
|--------------------------------------|-----------|-----------|-----------|
| H                                    | 1.085289  | -1.236965 | 2.941875  |
| H                                    | -0.301592 | 2.116837  | 3.465927  |
| H                                    | -1.305038 | 1.669504  | 2.052175  |
| H                                    | -0.874259 | 0.056338  | 4.635412  |
| H                                    | -2.420539 | 0.386213  | 3.804740  |
| H                                    | -1.176036 | -2.008003 | 3.318186  |
| H                                    | -1.803087 | -1.087129 | 1.932430  |
| 27                                   |           |           |           |
| D SCF Done: -710.645211674 A.U.      |           |           |           |
| C                                    | 3.346105  | -1.772581 | 0.025120  |
| C                                    | 1.972469  | -1.695223 | 0.006950  |
| C                                    | 1.361950  | -0.416726 | -0.035227 |
| C                                    | 3.549394  | 0.645644  | -0.059231 |
| C                                    | 4.140166  | -0.586114 | -0.001368 |
| H                                    | 3.839013  | -2.746257 | 0.056125  |
| H                                    | 1.346948  | -2.587631 | 0.016926  |
| H                                    | 4.071032  | 1.602414  | -0.092670 |
| H                                    | 5.229283  | -0.648235 | 0.017518  |
| C                                    | 0.060699  | 0.125257  | -0.080044 |
| C                                    | -1.250921 | -0.536190 | -0.069604 |
| C                                    | -1.453738 | -1.746854 | 0.620025  |
| C                                    | -2.340849 | 0.048537  | -0.744176 |
| C                                    | -2.710593 | -2.356459 | 0.627560  |
| H                                    | -0.632609 | -2.200291 | 1.178565  |
| C                                    | -3.597478 | -0.558379 | -0.725489 |
| H                                    | -2.197892 | 0.977146  | -1.302395 |
| C                                    | -3.786709 | -1.765476 | -0.043110 |
| H                                    | -2.852172 | -3.294073 | 1.171426  |
| H                                    | -4.431242 | -0.089169 | -1.253988 |
| H                                    | -4.770111 | -2.242433 | -0.032448 |
| N                                    | 2.177465  | 0.705108  | -0.081177 |
| N                                    | 1.459620  | 1.834682  | -0.152785 |
| N                                    | 0.198673  | 1.471295  | -0.152411 |
| Li                                   | -1.131525 | 2.972479  | -0.020624 |
| O                                    | -2.031405 | 4.136773  | 0.606989  |
| H                                    | -2.549710 | 4.826698  | 1.023068  |
| 53                                   |           |           |           |
| D-THF2 SCF Done: -1175.79183347 A.U. |           |           |           |
| C                                    | 5.139792  | -0.084307 | -0.539472 |
| C                                    | 4.060470  | 0.528319  | 0.055017  |
| C                                    | 2.753925  | 0.128460  | -0.323479 |
| C                                    | 3.684734  | -1.499232 | -1.871434 |
| C                                    | 4.946004  | -1.105611 | -1.518898 |
| H                                    | 6.155309  | 0.205327  | -0.261714 |
| H                                    | 4.185205  | 1.303021  | 0.811588  |
| H                                    | 3.437991  | -2.274277 | -2.597505 |
| H                                    | 5.801927  | -1.588653 | -1.992700 |
| C                                    | 1.419448  | 0.439994  | 0.012381  |
| C                                    | 0.902337  | 1.431330  | 0.967939  |
| C                                    | 1.569825  | 2.656529  | 1.161779  |
| C                                    | -0.280821 | 1.182757  | 1.690724  |
| C                                    | 1.070384  | 3.606093  | 2.056577  |
| H                                    | 2.469654  | 2.882962  | 0.586177  |
| C                                    | -0.777744 | 2.137415  | 2.579743  |
| H                                    | -0.819787 | 0.247038  | 1.543739  |
| C                                    | -0.106276 | 3.350655  | 2.769246  |



|                                  |           |           |           |
|----------------------------------|-----------|-----------|-----------|
| H                                | 1.597639  | 4.554654  | 2.188694  |
| H                                | -1.700509 | 1.930216  | 3.128299  |
| H                                | -0.499507 | 4.095165  | 3.466575  |
| N                                | 2.619989  | -0.881050 | -1.264737 |
| N                                | 1.327807  | -1.171669 | -1.490573 |
| N                                | 0.624645  | -0.377877 | -0.721165 |
| Li                               | -1.443516 | -0.859758 | -0.806549 |
| O                                | -2.419853 | -1.874567 | -1.859627 |
| H                                | -2.812506 | -1.765776 | -2.732649 |
| C                                | -2.625660 | -2.751913 | 0.975221  |
| O                                | -1.474014 | -1.868829 | 0.956295  |
| C                                | -0.321768 | -2.538063 | 1.493172  |
| C                                | -0.869500 | -3.751336 | 2.239368  |
| C                                | -2.077753 | -4.121891 | 1.370573  |
| H                                | -3.343966 | -2.370121 | 1.724268  |
| H                                | -3.057238 | -2.716334 | -0.039493 |
| H                                | 0.345642  | -2.843447 | 0.666555  |
| H                                | 0.230506  | -1.834958 | 2.137252  |
| H                                | -0.126333 | -4.557383 | 2.335296  |
| H                                | -1.197867 | -3.461806 | 3.252016  |
| H                                | -1.744200 | -4.669436 | 0.473104  |
| H                                | -2.823275 | -4.740443 | 1.892860  |
| C                                | -3.658913 | 0.873909  | -1.133549 |
| O                                | -2.284513 | 0.985000  | -0.709885 |
| C                                | -1.667552 | 2.138156  | -1.308965 |
| C                                | -2.784826 | 2.876275  | -2.051342 |
| C                                | -3.753502 | 1.736090  | -2.386929 |
| H                                | -3.837885 | -0.196391 | -1.320240 |
| H                                | -4.321864 | 1.251621  | -0.331275 |
| H                                | -1.194585 | 2.747286  | -0.522827 |
| H                                | -0.875977 | 1.798924  | -2.000938 |
| H                                | -3.273780 | 3.604973  | -1.383176 |
| H                                | -2.413835 | 3.418793  | -2.934053 |
| H                                | -4.779055 | 2.074187  | -2.599243 |
| H                                | -3.386812 | 1.163704  | -3.255955 |
| 27                               |           |           |           |
| B2 SCF Done: -1170.23938728 A.U. |           |           |           |
| C                                | -2.173918 | -2.482210 | -1.041536 |
| C                                | -1.348800 | -1.369855 | -0.889206 |
| C                                | -1.704569 | -0.366484 | 0.025240  |
| C                                | -3.634556 | -1.528703 | 0.596987  |
| C                                | -3.340351 | -2.573328 | -0.275949 |
| H                                | -1.908324 | -3.272991 | -1.747768 |
| H                                | -0.426880 | -1.275025 | -1.464532 |
| H                                | -4.545565 | -1.551292 | 1.204143  |
| H                                | -4.012858 | -3.429621 | -0.355790 |
| C                                | -0.843143 | 0.881118  | 0.200931  |
| H                                | -1.064290 | 1.293474  | 1.200609  |
| C                                | 0.643789  | 0.558734  | 0.147179  |
| C                                | 1.453371  | 0.921806  | -0.937091 |
| C                                | 1.226825  | -0.142148 | 1.215380  |
| C                                | 2.812232  | 0.591230  | -0.962785 |
| H                                | 1.009328  | 1.473940  | -1.765653 |
| C                                | 2.580336  | -0.481146 | 1.206949  |
| H                                | 0.611425  | -0.431626 | 2.072187  |
| C                                | 3.365275  | -0.110337 | 0.110144  |
| H                                | 3.437823  | 0.877094  | -1.810677 |

|                                       |           |           |           |
|---------------------------------------|-----------|-----------|-----------|
| H                                     | 3.026476  | -1.024209 | 2.042176  |
| N                                     | -2.845557 | -0.450586 | 0.741948  |
| N                                     | -2.155925 | 2.658681  | -0.643151 |
| N                                     | -1.189925 | 1.872175  | -0.846814 |
| O                                     | -2.847611 | 2.569323  | 0.453755  |
| Li                                    | -3.477650 | 1.286713  | 1.459618  |
| Cl                                    | 5.071036  | -0.531083 | 0.086769  |
| 53                                    |           |           |           |
| B2-THF2 SCF Done: -1635.40334073 A.U. |           |           |           |
| C                                     | 0.616544  | 3.787222  | -1.306017 |
| C                                     | 1.108015  | 2.785551  | -0.470615 |
| C                                     | 0.320649  | 1.650004  | -0.223316 |
| C                                     | -1.374008 | 2.482799  | -1.570436 |
| C                                     | -0.651823 | 3.635763  | -1.875478 |
| H                                     | 1.216310  | 4.677692  | -1.512023 |
| H                                     | 2.094777  | 2.872067  | -0.013107 |
| H                                     | -2.377570 | 2.326504  | -1.980219 |
| H                                     | -1.075849 | 4.393787  | -2.537269 |
| C                                     | 0.783318  | 0.551134  | 0.726075  |
| H                                     | 0.196624  | -0.346976 | 0.483077  |
| C                                     | 2.254676  | 0.212800  | 0.547937  |
| C                                     | 3.240127  | 0.646297  | 1.445328  |
| C                                     | 2.649545  | -0.552163 | -0.562008 |
| C                                     | 4.587924  | 0.333824  | 1.241335  |
| H                                     | 2.939215  | 1.228641  | 2.316649  |
| C                                     | 3.989790  | -0.874349 | -0.782047 |
| H                                     | 1.895256  | -0.905292 | -1.269983 |
| C                                     | 4.952768  | -0.423936 | 0.126438  |
| H                                     | 5.350719  | 0.675124  | 1.943923  |
| H                                     | 4.286850  | -1.472265 | -1.645713 |
| N                                     | -0.904135 | 1.516969  | -0.767939 |
| N                                     | -0.626386 | 0.744198  | 2.613387  |
| N                                     | 0.517284  | 0.977381  | 2.123157  |
| O                                     | -1.541525 | 0.175483  | 1.895987  |
| Li                                    | -2.071364 | 0.099259  | 0.126628  |
| C                                     | -1.428553 | -2.728068 | 0.327648  |
| O                                     | -1.683431 | -1.665139 | -0.611870 |
| C                                     | -0.947793 | -1.888891 | -1.833116 |
| C                                     | -0.147526 | -3.180572 | -1.617915 |
| C                                     | -0.075156 | -3.290209 | -0.088049 |
| H                                     | -1.448436 | -2.290142 | 1.336287  |
| H                                     | -2.226445 | -3.489919 | 0.246098  |
| H                                     | -1.656311 | -1.959821 | -2.674913 |
| H                                     | -0.299944 | -1.013547 | -2.005017 |
| H                                     | -0.691837 | -4.043172 | -2.034720 |
| H                                     | 0.841562  | -3.140588 | -2.097558 |
| H                                     | 0.083511  | -4.318894 | 0.267418  |
| H                                     | 0.735636  | -2.658954 | 0.309712  |
| C                                     | -4.693688 | 0.570407  | 1.202870  |
| O                                     | -3.974440 | 0.346909  | -0.029985 |
| C                                     | -4.764610 | -0.460270 | -0.931069 |
| C                                     | -6.106755 | -0.681405 | -0.227737 |
| C                                     | -5.726256 | -0.548346 | 1.252766  |
| H                                     | -3.959444 | 0.553644  | 2.021385  |
| H                                     | -5.177477 | 1.564389  | 1.167713  |
| H                                     | -4.861837 | 0.066652  | -1.894631 |
| H                                     | -4.224693 | -1.406353 | -1.104092 |

|                                          |           |           |           |
|------------------------------------------|-----------|-----------|-----------|
| H                                        | -6.823271 | 0.108675  | -0.506535 |
| H                                        | -6.554803 | -1.653314 | -0.482133 |
| H                                        | -6.579014 | -0.309852 | 1.905515  |
| H                                        | -5.258392 | -1.478142 | 1.617767  |
| Cl                                       | 6.644333  | -0.821831 | -0.138022 |
| 27                                       |           |           |           |
| TS_B2 SCF Done: -1170.18922036 A.U.      |           |           |           |
| C                                        | -1.798276 | -0.346389 | -0.055168 |
| C                                        | -1.438291 | -1.715161 | -0.198834 |
| C                                        | -2.414661 | -2.692865 | -0.291495 |
| C                                        | -3.771389 | -2.329381 | -0.249027 |
| C                                        | -4.060014 | -0.980020 | -0.111633 |
| N                                        | -3.125031 | -0.015106 | -0.005859 |
| H                                        | -2.124432 | -3.739509 | -0.419206 |
| H                                        | -0.387862 | -1.993067 | -0.268584 |
| H                                        | -4.572093 | -3.066587 | -0.328584 |
| H                                        | -5.103404 | -0.643312 | -0.077965 |
| C                                        | -0.790222 | 0.725486  | 0.020787  |
| H                                        | -1.414370 | 1.546164  | 1.139245  |
| Li                                       | -3.790487 | 1.683047  | 0.725766  |
| N                                        | -1.098326 | 1.904313  | -0.795900 |
| N                                        | -1.784640 | 2.773902  | -0.239683 |
| O                                        | -2.131032 | 2.446975  | 1.080661  |
| C                                        | 0.659109  | 0.394223  | -0.006574 |
| C                                        | 1.220443  | -0.445079 | 0.981030  |
| C                                        | 1.540871  | 0.948124  | -0.958553 |
| C                                        | 2.581609  | -0.748062 | 1.002274  |
| H                                        | 0.576410  | -0.863800 | 1.758465  |
| C                                        | 2.907494  | 0.661394  | -0.944720 |
| H                                        | 1.147302  | 1.617463  | -1.725046 |
| C                                        | 3.422768  | -0.192075 | 0.033376  |
| H                                        | 2.992744  | -1.400814 | 1.774989  |
| H                                        | 3.571071  | 1.096729  | -1.694827 |
| Cl                                       | 5.143158  | -0.558891 | 0.057661  |
| 53                                       |           |           |           |
| TS_B2-THF2 SCF Done: -1635.36334741 A.U. |           |           |           |
| C                                        | -0.085146 | 2.325143  | 0.291798  |
| C                                        | 0.684436  | 3.496862  | 0.086827  |
| C                                        | 0.184467  | 4.525431  | -0.700595 |
| C                                        | -1.090911 | 4.399227  | -1.273143 |
| C                                        | -1.797739 | 3.227914  | -1.017250 |
| N                                        | -1.317501 | 2.220235  | -0.274133 |
| H                                        | 0.774412  | 5.433133  | -0.855894 |
| H                                        | 1.655927  | 3.591795  | 0.574917  |
| H                                        | -1.525383 | 5.188649  | -1.889453 |
| H                                        | -2.799787 | 3.082262  | -1.437176 |
| C                                        | 0.385561  | 1.220997  | 1.145116  |
| H                                        | 0.469064  | 1.394164  | 2.638761  |
| Li                                       | -1.959864 | 0.287731  | -0.085450 |
| N                                        | -0.727084 | 0.308509  | 1.487585  |
| N                                        | -0.885168 | 0.144214  | 2.727348  |
| O                                        | -0.022128 | 0.788531  | 3.490166  |
| C                                        | 1.653491  | 0.516070  | 0.843307  |
| C                                        | 2.544322  | 0.911679  | -0.184434 |
| C                                        | 2.013986  | -0.648581 | 1.569834  |
| C                                        | 3.713752  | 0.204828  | -0.466569 |

|    |           |           |           |
|----|-----------|-----------|-----------|
| H  | 2.316024  | 1.780343  | -0.802337 |
| C  | 3.177353  | -1.365561 | 1.293618  |
| H  | 1.371525  | -1.007988 | 2.374397  |
| C  | 4.030124  | -0.937552 | 0.272580  |
| H  | 4.371616  | 0.533428  | -1.273990 |
| H  | 3.421043  | -2.260355 | 1.870343  |
| C  | -4.275875 | -1.271649 | -0.915787 |
| O  | -3.666003 | -0.533517 | 0.169247  |
| C  | -3.964325 | -1.185937 | 1.418992  |
| C  | -4.070050 | -2.657868 | 1.047011  |
| C  | -4.798690 | -2.583555 | -0.303855 |
| H  | -5.081722 | -0.664559 | -1.361424 |
| H  | -3.498858 | -1.434580 | -1.678887 |
| H  | -3.160332 | -0.947696 | 2.129710  |
| H  | -4.921309 | -0.801072 | 1.819820  |
| H  | -3.060157 | -3.083496 | 0.925983  |
| H  | -4.609130 | -3.251096 | 1.800277  |
| H  | -4.598530 | -3.450072 | -0.950923 |
| H  | -5.886938 | -2.525765 | -0.143517 |
| C  | -0.571421 | -2.058352 | -1.047020 |
| O  | -1.054608 | -0.753507 | -1.435826 |
| C  | -0.226889 | -0.199385 | -2.481106 |
| C  | 0.633354  | -1.359662 | -2.974114 |
| C  | 0.802937  | -2.190850 | -1.696459 |
| H  | -0.542727 | -2.107146 | 0.052198  |
| H  | -1.276912 | -2.823094 | -1.419513 |
| H  | -0.881686 | 0.230544  | -3.255239 |
| H  | 0.392312  | 0.607952  | -2.056171 |
| H  | 0.097462  | -1.938064 | -3.745062 |
| H  | 1.587934  | -1.016564 | -3.399600 |
| H  | 1.077148  | -3.238968 | -1.886049 |
| H  | 1.571118  | -1.741814 | -1.049437 |
| Cl | 5.494779  | -1.844182 | -0.091306 |

33

B3 SCF Done: -789.279212814 A.U.

|   |           |           |           |
|---|-----------|-----------|-----------|
| C | 2.127554  | -1.940838 | 1.752928  |
| C | 1.231362  | -0.986815 | 1.276282  |
| C | 1.531416  | -0.284427 | 0.098660  |
| C | 3.543748  | -1.429989 | -0.107264 |
| C | 3.308794  | -2.178680 | 1.043141  |
| H | 1.905838  | -2.497162 | 2.667374  |
| H | 0.295942  | -0.785941 | 1.800247  |
| H | 4.462715  | -1.573168 | -0.685426 |
| H | 4.036457  | -2.921956 | 1.374624  |
| C | 0.588871  | 0.788310  | -0.439501 |
| H | 0.800160  | 0.897328  | -1.517156 |
| C | -0.872864 | 0.387222  | -0.287116 |
| C | -1.714995 | 0.973713  | 0.659498  |
| C | -1.379181 | -0.629108 | -1.116930 |
| C | -3.053563 | 0.558314  | 0.794401  |
| H | -1.320874 | 1.767748  | 1.295568  |
| C | -2.703381 | -1.064408 | -1.006619 |
| H | -0.721636 | -1.089828 | -1.861052 |
| C | -3.528859 | -0.458176 | -0.040751 |
| H | -4.567984 | -0.789847 | 0.054505  |
| N | 2.685692  | -0.503205 | -0.566789 |
| N | 1.765882  | 2.823933  | -0.176199 |

|                                       |           |           |           |
|---------------------------------------|-----------|-----------|-----------|
| N                                     | 0.853374  | 2.069427  | 0.260858  |
| O                                     | 2.478290  | 2.459736  | -1.202120 |
| Li                                    | 3.194022  | 0.976048  | -1.783097 |
| C                                     | -3.253136 | -2.150492 | -1.898190 |
| H                                     | -3.659963 | -2.986066 | -1.303687 |
| H                                     | -4.081386 | -1.771757 | -2.521457 |
| H                                     | -2.482838 | -2.556433 | -2.571248 |
| C                                     | -3.941991 | 1.213120  | 1.823420  |
| H                                     | -3.508892 | 1.128699  | 2.834518  |
| H                                     | -4.056916 | 2.291204  | 1.617893  |
| H                                     | -4.946295 | 0.763584  | 1.844693  |
| 59                                    |           |           |           |
| B3-THF2 SCF Done: -1254.44318956 A.U. |           |           |           |
| C                                     | -0.866135 | -3.552291 | -1.788376 |
| C                                     | -1.328226 | -2.642863 | -0.839179 |
| C                                     | -0.502267 | -1.576196 | -0.450294 |
| C                                     | 1.173028  | -2.299947 | -1.881620 |
| C                                     | 0.412158  | -3.378765 | -2.329576 |
| H                                     | -1.495623 | -4.388311 | -2.104625 |
| H                                     | -2.321764 | -2.744464 | -0.399425 |
| H                                     | 2.184868  | -2.132179 | -2.265762 |
| H                                     | 0.814378  | -4.065096 | -3.077637 |
| C                                     | -0.940196 | -0.587314 | 0.622300  |
| H                                     | -0.303704 | 0.302831  | 0.511644  |
| C                                     | -2.387660 | -0.149890 | 0.448865  |
| C                                     | -3.409421 | -0.582241 | 1.296730  |
| C                                     | -2.703529 | 0.717179  | -0.612831 |
| C                                     | -4.739944 | -0.166387 | 1.099784  |
| H                                     | -3.158240 | -1.247353 | 2.124490  |
| C                                     | -4.014730 | 1.150509  | -0.833611 |
| H                                     | -1.906205 | 1.057911  | -1.279727 |
| C                                     | -5.024743 | 0.695239  | 0.034543  |
| H                                     | -6.055607 | 1.026589  | -0.127657 |
| N                                     | 0.732206  | -1.423326 | -0.967353 |
| N                                     | 0.410456  | -1.100689 | 2.491726  |
| N                                     | -0.731952 | -1.203135 | 1.956192  |
| O                                     | 1.372592  | -0.496712 | 1.869202  |
| Li                                    | 1.937472  | -0.191195 | 0.136212  |
| C                                     | 1.378086  | 2.607930  | 0.716109  |
| O                                     | 1.638318  | 1.676406  | -0.352436 |
| C                                     | 0.966704  | 2.097070  | -1.558350 |
| C                                     | 0.206256  | 3.380094  | -1.197453 |
| C                                     | 0.066697  | 3.279240  | 0.328335  |
| H                                     | 1.335983  | 2.033025  | 1.652737  |
| H                                     | 2.206226  | 3.339011  | 0.775675  |
| H                                     | 1.714302  | 2.252022  | -2.353866 |
| H                                     | 0.294671  | 1.282565  | -1.874628 |
| H                                     | 0.801118  | 4.267678  | -1.466855 |
| H                                     | -0.760473 | 3.449036  | -1.717561 |
| H                                     | -0.070887 | 4.254378  | 0.818186  |
| H                                     | -0.784552 | 2.633771  | 0.598425  |
| C                                     | 4.521988  | -0.871710 | 1.198434  |
| O                                     | 3.838401  | -0.480449 | -0.012369 |
| C                                     | 4.669918  | 0.408558  | -0.790833 |
| C                                     | 5.996516  | 0.513463  | -0.032701 |
| C                                     | 5.573956  | 0.209224  | 1.410626  |
| H                                     | 3.767285  | -0.941234 | 1.995220  |

|                                          |           |           |           |
|------------------------------------------|-----------|-----------|-----------|
| H                                        | 4.988160  | -1.863795 | 1.050069  |
| H                                        | 4.783600  | -0.002552 | -1.807555 |
| H                                        | 4.154413  | 1.380847  | -0.863105 |
| H                                        | 6.705953  | -0.251723 | -0.388421 |
| H                                        | 6.468869  | 1.499336  | -0.155380 |
| H                                        | 6.404207  | -0.125866 | 2.049850  |
| H                                        | 5.113982  | 1.097628  | 1.875215  |
| C                                        | -4.347097 | 2.103059  | -1.955767 |
| H                                        | -5.224177 | 1.759514  | -2.528729 |
| H                                        | -4.595251 | 3.105037  | -1.563638 |
| H                                        | -3.505567 | 2.218428  | -2.655976 |
| C                                        | -5.822696 | -0.650050 | 2.033038  |
| H                                        | -5.875777 | -1.752016 | 2.043178  |
| H                                        | -5.620596 | -0.334228 | 3.070836  |
| H                                        | -6.813453 | -0.264588 | 1.748228  |
| 33                                       |           |           |           |
| TS_B3 SCF Done: -789.228210192 A.U.      |           |           |           |
| C                                        | 1.613401  | 0.238760  | -0.155246 |
| C                                        | 1.331537  | 1.561968  | -0.599761 |
| C                                        | 2.360348  | 2.423017  | -0.940337 |
| C                                        | 3.694324  | 1.987441  | -0.850515 |
| C                                        | 3.905845  | 0.689099  | -0.412745 |
| N                                        | 2.919678  | -0.161312 | -0.064889 |
| H                                        | 2.129078  | 3.430983  | -1.296284 |
| H                                        | 0.297132  | 1.887227  | -0.698268 |
| H                                        | 4.534161  | 2.631112  | -1.117539 |
| H                                        | 4.927484  | 0.298864  | -0.325715 |
| C                                        | 0.545414  | -0.709547 | 0.194793  |
| H                                        | 1.157709  | -1.251217 | 1.476844  |
| Li                                       | 3.508193  | -1.663504 | 1.048612  |
| N                                        | 0.755124  | -2.074890 | -0.291576 |
| N                                        | 1.409020  | -2.815670 | 0.457613  |
| O                                        | 1.822488  | -2.180481 | 1.641144  |
| C                                        | -0.882656 | -0.291084 | 0.090471  |
| C                                        | -1.365688 | 0.760191  | 0.901582  |
| C                                        | -1.797136 | -0.942794 | -0.753504 |
| C                                        | -2.700440 | 1.172193  | 0.856180  |
| H                                        | -0.675673 | 1.258560  | 1.588578  |
| C                                        | -3.147613 | -0.557367 | -0.812528 |
| H                                        | -1.450892 | -1.769933 | -1.377133 |
| C                                        | -3.585254 | 0.502069  | -0.009447 |
| H                                        | -4.635012 | 0.810635  | -0.046137 |
| C                                        | -3.200654 | 2.305396  | 1.718981  |
| H                                        | -3.565931 | 3.143682  | 1.100748  |
| H                                        | -4.047325 | 1.984395  | 2.349344  |
| H                                        | -2.412722 | 2.694506  | 2.381680  |
| C                                        | -4.093811 | -1.284279 | -1.737702 |
| H                                        | -3.751818 | -1.223405 | -2.785021 |
| H                                        | -4.150197 | -2.357066 | -1.485414 |
| H                                        | -5.112932 | -0.871269 | -1.690034 |
| 59                                       |           |           |           |
| TS_B3-THF2 SCF Done: -1254.40167397 A.U. |           |           |           |
| C                                        | -0.427604 | 2.133531  | -0.655322 |
| C                                        | -1.401205 | 3.164309  | -0.626815 |
| C                                        | -1.098540 | 4.389211  | -0.049061 |
| C                                        | 0.180601  | 4.602423  | 0.490397  |

|    |           |           |           |
|----|-----------|-----------|-----------|
| C  | 1.091344  | 3.553117  | 0.416023  |
| N  | 0.805060  | 2.358973  | -0.123267 |
| H  | -1.846832 | 5.186794  | -0.032439 |
| H  | -2.375423 | 2.991894  | -1.087221 |
| H  | 0.462459  | 5.554475  | 0.944252  |
| H  | 2.104342  | 3.669048  | 0.818962  |
| C  | -0.687381 | 0.832096  | -1.288435 |
| H  | -0.785135 | 0.719726  | -2.795962 |
| Li | 1.783102  | 0.569965  | 0.020402  |
| N  | 0.574686  | 0.088198  | -1.494147 |
| N  | 0.773408  | -0.258843 | -2.689056 |
| O  | -0.183960 | 0.078435  | -3.535426 |
| C  | -1.812044 | -0.026260 | -0.833171 |
| C  | -2.750903 | 0.375875  | 0.141390  |
| C  | -1.952400 | -1.341655 | -1.347805 |
| C  | -3.782021 | -0.468718 | 0.580850  |
| H  | -2.672661 | 1.363895  | 0.597649  |
| C  | -2.965408 | -2.204243 | -0.921516 |
| H  | -1.252254 | -1.702197 | -2.102879 |
| C  | -3.883688 | -1.759136 | 0.046788  |
| H  | -4.679016 | -2.429299 | 0.387857  |
| C  | 4.343903  | -0.364141 | 1.045975  |
| O  | 3.614719  | 0.044396  | -0.135081 |
| C  | 4.028368  | -0.762294 | -1.255017 |
| C  | 4.389646  | -2.100743 | -0.627166 |
| C  | 5.089786  | -1.656105 | 0.666392  |
| H  | 5.030171  | 0.444724  | 1.348170  |
| H  | 3.606847  | -0.515463 | 1.849955  |
| H  | 3.197903  | -0.800227 | -1.974125 |
| H  | 4.904565  | -0.296610 | -1.745082 |
| H  | 3.469507  | -2.664837 | -0.401983 |
| H  | 5.026582  | -2.719505 | -1.276308 |
| H  | 5.042119  | -2.410855 | 1.464977  |
| H  | 6.151735  | -1.442013 | 0.467006  |
| C  | 0.837901  | -1.781319 | 1.403235  |
| O  | 1.080466  | -0.365379 | 1.557648  |
| C  | 0.153928  | 0.204541  | 2.507282  |
| C  | -0.494791 | -0.987699 | 3.205103  |
| C  | -0.500227 | -2.039919 | 2.089192  |
| H  | 0.830694  | -2.019641 | 0.328753  |
| H  | 1.661809  | -2.336742 | 1.887155  |
| H  | 0.712414  | 0.868659  | 3.185525  |
| H  | -0.592863 | 0.804536  | 1.961710  |
| H  | 0.125089  | -1.323781 | 4.053073  |
| H  | -1.499836 | -0.749742 | 3.583717  |
| H  | -0.588416 | -3.072364 | 2.458169  |
| H  | -1.326424 | -1.847323 | 1.388668  |
| C  | -3.072926 | -3.606048 | -1.472484 |
| H  | -2.905043 | -4.356991 | -0.680824 |
| H  | -4.078491 | -3.798608 | -1.883390 |
| H  | -2.338610 | -3.790083 | -2.271422 |
| C  | -4.759290 | 0.024919  | 1.621696  |
| H  | -5.371738 | -0.794034 | 2.029202  |
| H  | -4.238890 | 0.512606  | 2.462793  |
| H  | -5.448072 | 0.775704  | 1.195811  |

31

B4 SCF Done: -825.185484882 A.U.

|    |           |           |           |
|----|-----------|-----------|-----------|
| C  | -2.197687 | -2.486065 | -1.021981 |
| C  | -1.356589 | -1.388471 | -0.853114 |
| C  | -1.734501 | -0.355412 | 0.018836  |
| C  | -3.715578 | -1.464457 | 0.520251  |
| C  | -3.402529 | -2.534874 | -0.313719 |
| H  | -1.915040 | -3.298765 | -1.696095 |
| H  | -0.404339 | -1.326674 | -1.381404 |
| H  | -4.654932 | -1.454664 | 1.083018  |
| H  | -4.088938 | -3.378666 | -0.407531 |
| C  | -0.853624 | 0.876612  | 0.210115  |
| H  | -1.118569 | 1.316557  | 1.187100  |
| C  | 0.626779  | 0.525206  | 0.236460  |
| C  | 1.488775  | 0.794659  | -0.830806 |
| C  | 1.159530  | -0.119863 | 1.368051  |
| C  | 2.842955  | 0.435053  | -0.787830 |
| H  | 1.092618  | 1.302100  | -1.711179 |
| C  | 2.500023  | -0.485092 | 1.427541  |
| H  | 0.507892  | -0.341360 | 2.218956  |
| C  | 3.358908  | -0.211210 | 0.345839  |
| H  | 3.480401  | 0.666864  | -1.641652 |
| H  | 2.913429  | -0.982731 | 2.307916  |
| N  | -2.911284 | -0.399650 | 0.679705  |
| N  | -2.088275 | 2.659294  | -0.741668 |
| N  | -1.130016 | 1.849444  | -0.877050 |
| O  | -2.836521 | 2.613222  | 0.321487  |
| Li | -3.533995 | 1.366909  | 1.326788  |
| O  | 4.648745  | -0.601492 | 0.492571  |
| C  | 5.568139  | -0.350119 | -0.554522 |
| H  | 5.672847  | 0.730476  | -0.760644 |
| H  | 6.538743  | -0.742412 | -0.219955 |
| H  | 5.279496  | -0.864706 | -1.488991 |

57

B4-THF2 SCF Done: -1290.34908278 A.U.

|   |           |           |           |
|---|-----------|-----------|-----------|
| C | 0.610884  | 3.787801  | -1.295006 |
| C | 1.110365  | 2.765164  | -0.490797 |
| C | 0.316346  | 1.633489  | -0.245318 |
| C | -1.399716 | 2.510177  | -1.537415 |
| C | -0.672193 | 3.660810  | -1.837695 |
| H | 1.215508  | 4.675636  | -1.498484 |
| H | 2.108977  | 2.829589  | -0.055910 |
| H | -2.414130 | 2.372242  | -1.926712 |
| H | -1.102894 | 4.435698  | -2.475249 |
| C | 0.790850  | 0.512075  | 0.671006  |
| H | 0.180470  | -0.371074 | 0.431636  |
| C | 2.251248  | 0.152737  | 0.448538  |
| C | 3.270586  | 0.552346  | 1.318361  |
| C | 2.610916  | -0.601764 | -0.684140 |
| C | 4.611535  | 0.222226  | 1.078160  |
| H | 3.004576  | 1.126335  | 2.206850  |
| C | 3.936465  | -0.938810 | -0.938637 |
| H | 1.834530  | -0.931985 | -1.379888 |
| C | 4.954396  | -0.528151 | -0.057162 |
| H | 5.374464  | 0.553363  | 1.783340  |
| H | 4.212642  | -1.528195 | -1.816157 |
| N | -0.922443 | 1.524516  | -0.763570 |
| N | -0.566004 | 0.703047  | 2.599618  |
| N | 0.567702  | 0.922366  | 2.081472  |



|    |           |           |           |
|----|-----------|-----------|-----------|
| O  | -1.511867 | 0.160023  | 1.900439  |
| Li | -2.081277 | 0.107999  | 0.143765  |
| C  | -1.473783 | -2.729931 | 0.305950  |
| O  | -1.745373 | -1.658429 | -0.619116 |
| C  | -1.046148 | -1.879990 | -1.861869 |
| C  | -0.257447 | -3.183745 | -1.680483 |
| C  | -0.140620 | -3.305694 | -0.154329 |
| H  | -1.457430 | -2.297735 | 1.317127  |
| H  | -2.282948 | -3.481810 | 0.244725  |
| H  | -1.778312 | -1.933672 | -2.684565 |
| H  | -0.391312 | -1.011939 | -2.043572 |
| H  | -0.825695 | -4.035791 | -2.087063 |
| H  | 0.717335  | -3.152759 | -2.189164 |
| H  | 0.015373  | -4.338986 | 0.188849  |
| H  | 0.690038  | -2.687791 | 0.222843  |
| C  | -4.671834 | 0.604233  | 1.283197  |
| O  | -3.986457 | 0.381774  | 0.031172  |
| C  | -4.807694 | -0.410351 | -0.855165 |
| C  | -6.135408 | -0.618755 | -0.121379 |
| C  | -5.717433 | -0.501539 | 1.350313  |
| H  | -3.917619 | 0.571230  | 2.082880  |
| H  | -5.143460 | 1.604589  | 1.267935  |
| H  | -4.921057 | 0.123140  | -1.813348 |
| H  | -4.284048 | -1.362101 | -1.046034 |
| H  | -6.847797 | 0.182772  | -0.377240 |
| H  | -6.602500 | -1.582760 | -0.371648 |
| H  | -6.550912 | -0.257103 | 2.025394  |
| H  | -5.252963 | -1.439995 | 1.697043  |
| O  | 6.216238  | -0.903513 | -0.382716 |
| C  | 7.286384  | -0.528682 | 0.465093  |
| H  | 8.201678  | -0.936080 | 0.013095  |
| H  | 7.386109  | 0.569204  | 0.542596  |
| H  | 7.173888  | -0.948235 | 1.481222  |

31

TS\_B4 SCF Done: -825.133919787 A.U.

|    |           |           |           |
|----|-----------|-----------|-----------|
| C  | -1.803912 | -0.333522 | -0.052803 |
| C  | -1.418387 | -1.705421 | -0.058240 |
| C  | -2.370182 | -2.701804 | -0.183849 |
| C  | -3.728577 | -2.358512 | -0.308611 |
| C  | -4.042279 | -1.008424 | -0.290977 |
| N  | -3.133338 | -0.021507 | -0.157917 |
| H  | -2.059346 | -3.750206 | -0.203707 |
| H  | -0.363752 | -1.967540 | 0.011262  |
| H  | -4.509729 | -3.112442 | -0.419697 |
| H  | -5.087229 | -0.687532 | -0.383035 |
| C  | -0.812380 | 0.743753  | 0.060944  |
| H  | -1.538342 | 1.565628  | 1.119934  |
| Li | -3.874133 | 1.689789  | 0.446457  |
| N  | -1.058253 | 1.911970  | -0.782160 |
| N  | -1.803366 | 2.778459  | -0.298642 |
| O  | -2.267865 | 2.450888  | 0.987033  |
| C  | 0.640566  | 0.393039  | 0.104385  |
| C  | 1.183483  | -0.253682 | 1.235513  |
| C  | 1.528234  | 0.709756  | -0.937186 |
| C  | 2.531448  | -0.591064 | 1.308043  |
| H  | 0.527444  | -0.496368 | 2.076240  |
| C  | 2.890635  | 0.390775  | -0.873884 |

|                                          |           |           |           |
|------------------------------------------|-----------|-----------|-----------|
| H                                        | 1.147691  | 1.224125  | -1.821929 |
| C                                        | 3.404144  | -0.270983 | 0.252121  |
| H                                        | 2.940293  | -1.094552 | 2.187477  |
| H                                        | 3.536729  | 0.659897  | -1.710370 |
| O                                        | 4.703911  | -0.629322 | 0.415032  |
| C                                        | 5.632311  | -0.329247 | -0.609184 |
| H                                        | 5.711169  | 0.758325  | -0.790476 |
| H                                        | 6.608406  | -0.701930 | -0.267582 |
| H                                        | 5.374774  | -0.829744 | -1.560607 |
| 57                                       |           |           |           |
| TS_B4-THF2 SCF Done: -1290.30608925 A.U. |           |           |           |
| C                                        | -0.238026 | 2.211202  | 0.353417  |
| C                                        | 0.518729  | 3.411561  | 0.304618  |
| C                                        | 0.072893  | 4.482982  | -0.454728 |
| C                                        | -1.136448 | 4.375321  | -1.163121 |
| C                                        | -1.831585 | 3.174594  | -1.064491 |
| N                                        | -1.402995 | 2.124466  | -0.348012 |
| H                                        | 0.651867  | 5.410476  | -0.485363 |
| H                                        | 1.435039  | 3.489288  | 0.892352  |
| H                                        | -1.527221 | 5.198969  | -1.763659 |
| H                                        | -2.780382 | 3.038133  | -1.596788 |
| C                                        | 0.168266  | 1.067972  | 1.176779  |
| H                                        | 0.034182  | 1.107112  | 2.697269  |
| Li                                       | -1.979851 | 0.170576  | -0.409501 |
| N                                        | -0.928675 | 0.081638  | 1.289971  |
| N                                        | -1.238043 | -0.206957 | 2.476543  |
| O                                        | -0.519577 | 0.405639  | 3.405737  |
| C                                        | 1.506709  | 0.437251  | 0.991399  |
| C                                        | 2.467676  | 0.898459  | 0.067555  |
| C                                        | 1.858902  | -0.730624 | 1.717085  |
| C                                        | 3.701531  | 0.262178  | -0.120641 |
| H                                        | 2.253717  | 1.771512  | -0.550307 |
| C                                        | 3.075390  | -1.378905 | 1.529368  |
| H                                        | 1.163587  | -1.144609 | 2.448627  |
| C                                        | 4.019432  | -0.891643 | 0.609610  |
| H                                        | 4.395560  | 0.672374  | -0.855429 |
| H                                        | 3.319301  | -2.280259 | 2.097416  |
| C                                        | -4.377722 | -0.684597 | 0.951240  |
| O                                        | -3.756531 | -0.547442 | -0.337273 |
| C                                        | -4.060943 | -1.759019 | -1.044224 |
| C                                        | -3.926487 | -2.876973 | 0.003043  |
| C                                        | -4.121623 | -2.142600 | 1.357574  |
| H                                        | -3.928250 | 0.054097  | 1.629173  |
| H                                        | -5.458545 | -0.471934 | 0.852883  |
| H                                        | -5.093107 | -1.696811 | -1.436146 |
| H                                        | -3.364606 | -1.838710 | -1.890403 |
| H                                        | -4.670410 | -3.669799 | -0.163248 |
| H                                        | -2.928547 | -3.336164 | -0.049794 |
| H                                        | -4.956982 | -2.547992 | 1.946897  |
| H                                        | -3.211015 | -2.201655 | 1.970880  |
| C                                        | -0.411094 | -2.097941 | -1.312622 |
| O                                        | -0.940007 | -0.810298 | -1.703722 |
| C                                        | -0.028746 | -0.146727 | -2.608207 |
| C                                        | 0.977394  | -1.214884 | -3.028080 |
| C                                        | 1.042249  | -2.097829 | -1.775801 |
| H                                        | -0.523288 | -2.204585 | -0.223137 |
| H                                        | -0.998782 | -2.888760 | -1.812440 |

|                                       |           |           |           |
|---------------------------------------|-----------|-----------|-----------|
| H                                     | -0.609214 | 0.272216  | -3.445145 |
| H                                     | 0.464993  | 0.681483  | -2.073060 |
| H                                     | 0.595409  | -1.789032 | -3.888600 |
| H                                     | 1.949702  | -0.781147 | -3.304852 |
| H                                     | 1.417612  | -3.112859 | -1.972283 |
| H                                     | 1.682850  | -1.631378 | -1.012751 |
| O                                     | 5.182030  | -1.591760 | 0.498644  |
| C                                     | 6.155436  | -1.151335 | -0.425031 |
| H                                     | 6.518939  | -0.133243 | -0.191942 |
| H                                     | 7.000040  | -1.851537 | -0.352712 |
| H                                     | 5.776183  | -1.160723 | -1.463988 |
| 35                                    |           |           |           |
| B5 SCF Done: -844.637333339 A.U.      |           |           |           |
| C                                     | 2.431696  | 2.462094  | -1.163554 |
| C                                     | 1.648452  | 1.328690  | -0.958862 |
| C                                     | 2.035364  | 0.385382  | 0.006339  |
| C                                     | 3.914771  | 1.651431  | 0.530464  |
| C                                     | 3.588024  | 2.637907  | -0.396258 |
| H                                     | 2.141501  | 3.205151  | -1.910878 |
| H                                     | 0.732762  | 1.169402  | -1.529677 |
| H                                     | 4.818596  | 1.740493  | 1.142437  |
| H                                     | 4.226997  | 3.515115  | -0.515330 |
| C                                     | 1.216068  | -0.881053 | 0.244599  |
| H                                     | 1.460858  | -1.237046 | 1.260612  |
| C                                     | -0.280358 | -0.619638 | 0.179814  |
| C                                     | -1.067438 | -0.953342 | -0.930515 |
| C                                     | -0.922569 | 0.016145  | 1.253360  |
| C                                     | -2.431923 | -0.664295 | -0.976959 |
| H                                     | -0.596190 | -1.457640 | -1.775549 |
| C                                     | -2.283061 | 0.315696  | 1.229203  |
| H                                     | -0.341418 | 0.290889  | 2.139869  |
| C                                     | -3.085446 | -0.017535 | 0.104591  |
| H                                     | -2.990616 | -0.950955 | -1.867548 |
| H                                     | -2.722710 | 0.807845  | 2.096188  |
| N                                     | 3.167253  | 0.551199  | 0.724015  |
| N                                     | 2.597434  | -2.644245 | -0.529115 |
| N                                     | 1.600215  | -1.906657 | -0.759772 |
| O                                     | 3.293513  | -2.481064 | 0.558693  |
| Li                                    | 3.844848  | -1.132081 | 1.518443  |
| N                                     | -4.433775 | 0.271570  | 0.068759  |
| C                                     | -5.059859 | 0.955275  | 1.182440  |
| H                                     | -4.619678 | 1.954613  | 1.361883  |
| H                                     | -6.128211 | 1.093615  | 0.973249  |
| H                                     | -4.974812 | 0.381640  | 2.124101  |
| C                                     | -5.217632 | -0.066564 | -1.102330 |
| H                                     | -4.853798 | 0.446664  | -2.012644 |
| H                                     | -5.209017 | -1.152907 | -1.308806 |
| H                                     | -6.261334 | 0.233651  | -0.943977 |
| 61                                    |           |           |           |
| B5-THF2 SCF Done: -1309.80075225 A.U. |           |           |           |
| C                                     | 0.240937  | 3.793450  | -1.429615 |
| C                                     | 0.753585  | 2.836426  | -0.556313 |
| C                                     | 0.002105  | 1.682203  | -0.281689 |
| C                                     | -1.699436 | 2.413401  | -1.680367 |
| C                                     | -1.012759 | 3.579875  | -2.013010 |
| H                                     | 0.812845  | 4.697408  | -1.655710 |

|    |           |           |           |
|----|-----------|-----------|-----------|
| H  | 1.731114  | 2.967749  | -0.089833 |
| H  | -2.690398 | 2.208698  | -2.099710 |
| H  | -1.451605 | 4.300856  | -2.705874 |
| C  | 0.494442  | 0.628182  | 0.703128  |
| H  | -0.073868 | -0.289656 | 0.491950  |
| C  | 1.973732  | 0.320923  | 0.542621  |
| C  | 2.960610  | 0.845139  | 1.388401  |
| C  | 2.403791  | -0.508197 | -0.505188 |
| C  | 4.314818  | 0.565473  | 1.199684  |
| H  | 2.653399  | 1.479231  | 2.221739  |
| C  | 3.750607  | -0.800998 | -0.713763 |
| H  | 1.663102  | -0.943106 | -1.182879 |
| C  | 4.755124  | -0.263620 | 0.134924  |
| H  | 5.033871  | 0.998946  | 1.894391  |
| H  | 4.017485  | -1.457455 | -1.541519 |
| N  | -1.209991 | 1.491309  | -0.838424 |
| N  | -0.929504 | 0.865714  | 2.579279  |
| N  | 0.211409  | 1.099050  | 2.084668  |
| O  | -1.834629 | 0.255014  | 1.880629  |
| Li | -2.344069 | 0.085601  | 0.113432  |
| C  | -1.656882 | -2.711692 | 0.458187  |
| O  | -1.928111 | -1.706837 | -0.539170 |
| C  | -1.166224 | -1.969336 | -1.736272 |
| C  | -0.348920 | -3.235878 | -1.451137 |
| C  | -0.288680 | -3.266566 | 0.082772  |
| H  | -1.693181 | -2.220263 | 1.441418  |
| H  | -2.438135 | -3.493600 | 0.412742  |
| H  | -1.858342 | -2.087875 | -2.586318 |
| H  | -0.528471 | -1.091992 | -1.933878 |
| H  | -0.876618 | -4.126678 | -1.828471 |
| H  | 0.643806  | -3.203900 | -1.923851 |
| H  | -0.113302 | -4.272540 | 0.491548  |
| H  | 0.505898  | -2.599479 | 0.453776  |
| C  | -4.980201 | 0.547607  | 1.162531  |
| O  | -4.255515 | 0.282348  | -0.058415 |
| C  | -5.025020 | -0.587365 | -0.917845 |
| C  | -6.358722 | -0.813880 | -0.199778 |
| C  | -5.979891 | -0.596567 | 1.271153  |
| H  | -4.244880 | 0.593320  | 1.978943  |
| H  | -5.493164 | 1.523958  | 1.077811  |
| H  | -5.140587 | -0.108739 | -1.904388 |
| H  | -4.458601 | -1.524464 | -1.049500 |
| H  | -7.099382 | -0.060524 | -0.514796 |
| H  | -6.777709 | -1.810208 | -0.404514 |
| H  | -6.838189 | -0.350872 | 1.913942  |
| H  | -5.484495 | -1.493146 | 1.680340  |
| C  | 6.499032  | -1.446147 | -1.117751 |
| H  | 7.593858  | -1.523144 | -1.132972 |
| H  | 6.089621  | -2.465800 | -0.979964 |
| H  | 6.176772  | -1.091779 | -2.113764 |
| C  | 7.081034  | -0.040147 | 0.872300  |
| H  | 6.920988  | -0.422360 | 1.898973  |
| H  | 8.081931  | -0.353858 | 0.549323  |
| H  | 7.078813  | 1.063760  | 0.926080  |
| N  | 6.093396  | -0.538531 | -0.063741 |

35

TS\_B5 SCF Done: -844.585557654 A.U.

|                                          |           |           |           |
|------------------------------------------|-----------|-----------|-----------|
| C                                        | 2.113330  | 0.354987  | -0.055557 |
| C                                        | 1.652242  | 1.703433  | -0.105792 |
| C                                        | 2.550120  | 2.747071  | -0.238857 |
| C                                        | 3.928868  | 2.477037  | -0.323965 |
| C                                        | 4.316598  | 1.147929  | -0.259430 |
| N                                        | 3.460615  | 0.115267  | -0.120595 |
| H                                        | 2.183038  | 3.775969  | -0.293168 |
| H                                        | 0.582831  | 1.904841  | -0.060959 |
| H                                        | 4.669230  | 3.270618  | -0.438407 |
| H                                        | 5.379977  | 0.883427  | -0.315029 |
| C                                        | 1.177064  | -0.766193 | 0.073128  |
| H                                        | 1.910486  | -1.484478 | 1.199021  |
| Li                                       | 4.268985  | -1.525658 | 0.569694  |
| N                                        | 1.512563  | -1.963719 | -0.691935 |
| N                                        | 2.288833  | -2.759275 | -0.138875 |
| O                                        | 2.695876  | -2.332198 | 1.137985  |
| C                                        | -0.293018 | -0.486034 | 0.033452  |
| C                                        | -0.947926 | 0.078709  | 1.142168  |
| C                                        | -1.094585 | -0.781408 | -1.084096 |
| C                                        | -2.313098 | 0.364017  | 1.137373  |
| H                                        | -0.367794 | 0.304362  | 2.042225  |
| C                                        | -2.464278 | -0.519549 | -1.105100 |
| H                                        | -0.633429 | -1.238795 | -1.962737 |
| C                                        | -3.118292 | 0.077513  | 0.004141  |
| H                                        | -2.753578 | 0.802861  | 2.032353  |
| H                                        | -3.026005 | -0.780424 | -2.001916 |
| C                                        | -5.123194 | 0.845987  | 1.184558  |
| H                                        | -6.185977 | 1.025754  | 0.976997  |
| H                                        | -5.057764 | 0.128832  | 2.026658  |
| H                                        | -4.687442 | 1.800945  | 1.528817  |
| C                                        | -5.280979 | -0.061758 | -1.140738 |
| H                                        | -4.928890 | 0.384842  | -2.087593 |
| H                                        | -5.286593 | -1.161670 | -1.274674 |
| H                                        | -6.317952 | 0.265019  | -0.989179 |
| N                                        | -4.472185 | 0.359444  | -0.014747 |
| 61                                       |           |           |           |
| TS_B5-THF2 SCF Done: -1309.75743388 A.U. |           |           |           |
| C                                        | -0.806256 | 1.931108  | 0.586833  |
| C                                        | -0.310921 | 3.239637  | 0.838445  |
| C                                        | -0.938999 | 4.339881  | 0.276441  |
| C                                        | -2.073642 | 4.153902  | -0.534400 |
| C                                        | -2.506497 | 2.848115  | -0.737353 |
| N                                        | -1.898088 | 1.772362  | -0.215217 |
| H                                        | -0.562657 | 5.346946  | 0.478374  |
| H                                        | 0.547402  | 3.366884  | 1.500499  |
| H                                        | -2.602750 | 4.995033  | -0.986369 |
| H                                        | -3.384061 | 2.646091  | -1.363248 |
| C                                        | -0.211926 | 0.743534  | 1.199272  |
| H                                        | -0.459220 | 0.420512  | 2.675856  |
| Li                                       | -2.041962 | -0.192364 | -0.744061 |
| N                                        | -1.067520 | -0.446517 | 0.989452  |
| N                                        | -1.386747 | -1.042719 | 2.051230  |
| O                                        | -0.892205 | -0.511590 | 3.162068  |
| C                                        | 1.243168  | 0.449116  | 1.035202  |
| C                                        | 2.126845  | 1.251941  | 0.282198  |
| C                                        | 1.809982  | -0.730878 | 1.569606  |
| C                                        | 3.468520  | 0.920826  | 0.086666  |

|   |           |           |           |
|---|-----------|-----------|-----------|
| H | 1.759856  | 2.160202  | -0.198852 |
| C | 3.144116  | -1.083960 | 1.369922  |
| H | 1.188921  | -1.409090 | 2.157626  |
| C | 4.029614  | -0.258941 | 0.633375  |
| H | 4.076252  | 1.594026  | -0.518112 |
| H | 3.495069  | -2.019668 | 1.804953  |
| C | -3.806251 | -2.451078 | -0.662045 |
| O | -3.767974 | -1.009114 | -0.711190 |
| C | -4.681530 | -0.455085 | 0.268550  |
| C | -5.407807 | -1.652312 | 0.884833  |
| C | -4.383111 | -2.780384 | 0.708770  |
| H | -4.451890 | -2.826349 | -1.477550 |
| H | -2.786043 | -2.833575 | -0.821378 |
| H | -4.091449 | 0.096772  | 1.018931  |
| H | -5.356257 | 0.254471  | -0.236549 |
| H | -5.684563 | -1.472398 | 1.933956  |
| H | -6.327394 | -1.879543 | 0.320712  |
| H | -3.592614 | -2.702753 | 1.472147  |
| H | -4.824130 | -3.787144 | 0.752281  |
| C | -0.037361 | -1.897759 | -1.937497 |
| O | -0.783436 | -0.673009 | -2.114185 |
| C | 0.039397  | 0.328778  | -2.754329 |
| C | 1.285982  | -0.410918 | -3.234852 |
| C | 1.419738  | -1.523382 | -2.187825 |
| H | -0.221352 | -2.273350 | -0.919330 |
| H | -0.401275 | -2.644207 | -2.666831 |
| H | -0.541272 | 0.794298  | -3.566430 |
| H | 0.293450  | 1.105562  | -2.014181 |
| H | 1.119652  | -0.839504 | -4.237176 |
| H | 2.165136  | 0.248609  | -3.281320 |
| H | 2.018881  | -2.379808 | -2.530444 |
| H | 1.871429  | -1.127158 | -1.266029 |
| C | 5.818233  | -1.920316 | 0.816616  |
| H | 5.661914  | -2.122168 | 1.889833  |
| H | 5.302049  | -2.722362 | 0.249022  |
| H | 6.895709  | -2.007047 | 0.622550  |
| C | 6.159817  | 0.158876  | -0.499022 |
| H | 5.775798  | 0.083180  | -1.537886 |
| H | 6.197711  | 1.230034  | -0.238071 |
| H | 7.192936  | -0.213952 | -0.490730 |
| N | 5.368482  | -0.591688 | 0.453957  |

33

B6 SCF Done: -789.277552136 A.U.

|   |           |           |           |
|---|-----------|-----------|-----------|
| C | 2.282733  | -2.209198 | 0.900955  |
| C | 1.345273  | -1.168792 | 0.925767  |
| C | 1.404744  | -0.221761 | -0.124896 |
| C | 3.255730  | -1.279063 | -1.072235 |
| C | 3.240255  | -2.285183 | -0.112105 |
| H | 2.262011  | -2.964947 | 1.691430  |
| H | 4.010629  | -1.267012 | -1.865231 |
| H | 3.972791  | -3.094266 | -0.143687 |
| C | 0.413631  | 0.936706  | -0.235455 |
| H | 0.582089  | 1.396722  | -1.226614 |
| C | -1.044049 | 0.488525  | -0.218631 |
| C | -2.023197 | 1.174419  | 0.508243  |
| C | -1.445331 | -0.612054 | -0.994910 |
| C | -3.361068 | 0.763978  | 0.472111  |

|    |           |           |           |
|----|-----------|-----------|-----------|
| H  | -1.727265 | 2.031788  | 1.114399  |
| C  | -2.778706 | -1.020303 | -1.027118 |
| H  | -0.702582 | -1.162525 | -1.579728 |
| C  | -3.765791 | -0.340943 | -0.290110 |
| H  | -4.105302 | 1.316640  | 1.053590  |
| H  | -3.062868 | -1.883999 | -1.636474 |
| N  | 2.366256  | -0.274192 | -1.070884 |
| N  | 1.603886  | 2.775969  | 0.633804  |
| N  | 0.671268  | 1.942387  | 0.818358  |
| O  | 2.317556  | 2.717934  | -0.449640 |
| Li | 2.796322  | 1.569242  | -1.683003 |
| C  | -5.202733 | -0.797781 | -0.329321 |
| H  | -5.853584 | -0.148433 | 0.275524  |
| H  | -5.592452 | -0.802275 | -1.361573 |
| H  | -5.303967 | -1.828075 | 0.053036  |
| C  | 0.330655  | -1.086737 | 2.036253  |
| H  | 0.171737  | -0.047343 | 2.353597  |
| H  | -0.645994 | -1.482337 | 1.712907  |
| H  | 0.662604  | -1.675173 | 2.904718  |

59

B6-THF2 SCF Done: -1254.44156568 A.U.

|    |           |           |           |
|----|-----------|-----------|-----------|
| C  | 0.779254  | 3.946094  | -0.892279 |
| C  | 1.259916  | 2.897367  | -0.097983 |
| C  | 0.517327  | 1.692203  | -0.103203 |
| C  | -1.072929 | 2.584775  | -1.548445 |
| C  | -0.392315 | 3.795978  | -1.637415 |
| H  | 1.327712  | 4.892222  | -0.918656 |
| H  | -2.013761 | 2.424069  | -2.085305 |
| H  | -0.778242 | 4.606313  | -2.259574 |
| C  | 0.927990  | 0.475954  | 0.718671  |
| H  | 0.251926  | -0.335494 | 0.414346  |
| C  | 2.333350  | -0.034398 | 0.436257  |
| C  | 3.126697  | -0.589761 | 1.447416  |
| C  | 2.830895  | -0.056041 | -0.878229 |
| C  | 4.379844  | -1.141505 | 1.156039  |
| H  | 2.755007  | -0.582643 | 2.473406  |
| C  | 4.080831  | -0.605760 | -1.165926 |
| H  | 2.233817  | 0.367407  | -1.690589 |
| C  | 4.883471  | -1.159947 | -0.152462 |
| H  | 4.978187  | -1.567029 | 1.967482  |
| H  | 4.443672  | -0.606006 | -2.198596 |
| N  | -0.628719 | 1.566282  | -0.800385 |
| N  | -0.438074 | 0.582560  | 2.630605  |
| N  | 0.729482  | 0.742935  | 2.162541  |
| O  | -1.406902 | 0.221983  | 1.852033  |
| Li | -1.854184 | 0.140402  | 0.045084  |
| C  | -1.320317 | -2.695809 | 0.305448  |
| O  | -1.451959 | -1.646159 | -0.674437 |
| C  | -0.563599 | -1.888809 | -1.788065 |
| C  | 0.193902  | -3.180996 | -1.456383 |
| C  | 0.072696  | -3.267249 | 0.072000  |
| H  | -1.462960 | -2.242944 | 1.297589  |
| H  | -2.105568 | -3.456421 | 0.136186  |
| H  | -1.158236 | -1.964137 | -2.713299 |
| H  | 0.111050  | -1.022360 | -1.881002 |
| H  | -0.298433 | -4.047714 | -1.926370 |
| H  | 1.236115  | -3.148236 | -1.806014 |

|   |           |           |           |
|---|-----------|-----------|-----------|
| H | 0.179904  | -4.290991 | 0.459751  |
| H | 0.830734  | -2.632596 | 0.558872  |
| C | -4.517390 | 0.377984  | 1.103243  |
| O | -3.764307 | 0.326419  | -0.127554 |
| C | -4.492065 | -0.427657 | -1.123233 |
| C | -5.794734 | -0.873234 | -0.447962 |
| C | -5.425144 | -0.842890 | 1.041283  |
| H | -3.794294 | 0.374549  | 1.931297  |
| H | -5.105043 | 1.314885  | 1.135187  |
| H | -4.662160 | 0.209386  | -2.007126 |
| H | -3.864128 | -1.282797 | -1.422607 |
| H | -6.601931 | -0.150574 | -0.651016 |
| H | -6.127335 | -1.861457 | -0.798531 |
| H | -6.296486 | -0.760352 | 1.707766  |
| H | -4.858018 | -1.747127 | 1.319905  |
| C | 2.514440  | 3.065480  | 0.719112  |
| H | 2.410770  | 2.587422  | 1.702745  |
| H | 3.379197  | 2.598225  | 0.219573  |
| H | 2.744190  | 4.131796  | 0.864658  |
| C | 6.237458  | -1.740872 | -0.475830 |
| H | 6.169179  | -2.494641 | -1.278346 |
| H | 6.931360  | -0.959470 | -0.831596 |
| H | 6.695379  | -2.220330 | 0.402641  |

33

TS\_B6 SCF Done: -789.219155284 A.U.

|    |           |           |           |
|----|-----------|-----------|-----------|
| C  | 1.509875  | -0.186115 | 0.048404  |
| C  | 1.399109  | -1.578105 | 0.396928  |
| C  | 2.517021  | -2.393237 | 0.212882  |
| C  | 3.740372  | -1.873551 | -0.225829 |
| C  | 3.800911  | -0.503989 | -0.433170 |
| N  | 2.738000  | 0.307354  | -0.315456 |
| H  | 2.443525  | -3.453939 | 0.471813  |
| H  | 4.623100  | -2.502556 | -0.353443 |
| H  | 4.749849  | -0.029737 | -0.713248 |
| C  | 0.386069  | 0.767004  | 0.119822  |
| H  | 0.830372  | 1.834804  | -0.965501 |
| Li | 3.112943  | 2.127599  | -0.941581 |
| N  | 0.621063  | 1.898163  | 1.034674  |
| N  | 1.135021  | 2.906739  | 0.542380  |
| O  | 1.379701  | 2.790359  | -0.851846 |
| C  | -1.030770 | 0.366900  | 0.046264  |
| C  | -1.473436 | -0.506539 | -0.975612 |
| C  | -2.025589 | 0.901984  | 0.894445  |
| C  | -2.816267 | -0.853673 | -1.109915 |
| H  | -0.741572 | -0.914846 | -1.678509 |
| C  | -3.370671 | 0.552929  | 0.748915  |
| H  | -1.735598 | 1.596823  | 1.685508  |
| C  | -3.800936 | -0.334848 | -0.249607 |
| H  | -3.112001 | -1.538068 | -1.912000 |
| H  | -4.107115 | 0.983423  | 1.435404  |
| C  | 0.182743  | -2.181750 | 1.052254  |
| H  | -0.281356 | -1.482454 | 1.761965  |
| H  | -0.601070 | -2.454515 | 0.328167  |
| H  | 0.465011  | -3.093708 | 1.600048  |
| C  | -5.256326 | -0.690720 | -0.427194 |
| H  | -5.850774 | -0.424548 | 0.460855  |
| H  | -5.699740 | -0.160638 | -1.289680 |



|                                          |           |           |           |
|------------------------------------------|-----------|-----------|-----------|
| H                                        | -5.390287 | -1.769237 | -0.614570 |
| 59                                       |           |           |           |
| TS_B6-THF2 SCF Done: -1254.40066235 A.U. |           |           |           |
| C                                        | 0.619631  | 2.062034  | 0.051266  |
| C                                        | 1.608291  | 3.074530  | -0.143933 |
| C                                        | 1.331217  | 4.084771  | -1.067491 |
| C                                        | 0.112347  | 4.115961  | -1.756010 |
| C                                        | -0.812295 | 3.115364  | -1.473553 |
| N                                        | -0.567420 | 2.122312  | -0.610375 |
| H                                        | 2.069980  | 4.875412  | -1.231310 |
| H                                        | -0.119027 | 4.905829  | -2.473477 |
| H                                        | -1.791858 | 3.103046  | -1.965481 |
| C                                        | 0.813256  | 0.958352  | 1.011334  |
| H                                        | 0.971700  | 1.194732  | 2.527823  |
| Li                                       | -1.691059 | 0.476605  | -0.166699 |
| N                                        | -0.488582 | 0.394458  | 1.427312  |
| N                                        | -0.656136 | 0.345023  | 2.673840  |
| O                                        | 0.367276  | 0.785795  | 3.393902  |
| C                                        | 1.838565  | -0.080479 | 0.744282  |
| C                                        | 2.688021  | -0.050290 | -0.386367 |
| C                                        | 1.982310  | -1.205254 | 1.597278  |
| C                                        | 3.629562  | -1.054293 | -0.630736 |
| H                                        | 2.594728  | 0.761893  | -1.109942 |
| C                                        | 2.915622  | -2.207773 | 1.339115  |
| H                                        | 1.351460  | -1.295166 | 2.483003  |
| C                                        | 3.770324  | -2.157898 | 0.223298  |
| H                                        | 4.258567  | -0.982761 | -1.524098 |
| H                                        | 2.982736  | -3.057541 | 2.026616  |
| C                                        | -4.396070 | -0.393219 | -0.817367 |
| O                                        | -3.564632 | 0.258578  | 0.171808  |
| C                                        | -4.011987 | -0.106069 | 1.492592  |
| C                                        | -4.595560 | -1.499857 | 1.311325  |
| C                                        | -5.306716 | -1.360770 | -0.042965 |
| H                                        | -4.965749 | 0.369940  | -1.373562 |
| H                                        | -3.725503 | -0.910903 | -1.521236 |
| H                                        | -3.150298 | -0.053615 | 2.173012  |
| H                                        | -4.781433 | 0.611617  | 1.835294  |
| H                                        | -3.779772 | -2.239448 | 1.252195  |
| H                                        | -5.269751 | -1.790614 | 2.130407  |
| H                                        | -5.433341 | -2.319189 | -0.567446 |
| H                                        | -6.305562 | -0.918270 | 0.099132  |
| C                                        | -1.039457 | -2.278789 | -0.755968 |
| O                                        | -1.192288 | -0.967411 | -1.340727 |
| C                                        | -0.316474 | -0.815685 | -2.479063 |
| C                                        | 0.214117  | -2.216747 | -2.773794 |
| C                                        | 0.231327  | -2.849783 | -1.376936 |
| H                                        | -0.981472 | -2.168166 | 0.337573  |
| H                                        | -1.927956 | -2.886621 | -1.007164 |
| H                                        | -0.892479 | -0.375538 | -3.308451 |
| H                                        | 0.498142  | -0.123664 | -2.210008 |
| H                                        | -0.478283 | -2.760971 | -3.437517 |
| H                                        | 1.204472  | -2.192121 | -3.251886 |
| H                                        | 0.232394  | -3.949659 | -1.392221 |
| H                                        | 1.112513  | -2.507550 | -0.814168 |
| C                                        | 2.877199  | 3.095641  | 0.662398  |
| H                                        | 3.576003  | 2.296983  | 0.364667  |
| H                                        | 3.399401  | 4.058521  | 0.556630  |

|                                           |           |           |           |
|-------------------------------------------|-----------|-----------|-----------|
| H                                         | 2.657184  | 2.925637  | 1.729664  |
| C                                         | 4.791279  | -3.239608 | -0.027869 |
| H                                         | 5.638437  | -3.168223 | 0.678074  |
| H                                         | 4.356297  | -4.245143 | 0.099567  |
| H                                         | 5.206701  | -3.177331 | -1.045918 |
| 42                                        |           |           |           |
| B6_tBu SCF Done: -906.264491167 A.U.      |           |           |           |
| C                                         | 2.374518  | -1.774721 | -0.897639 |
| C                                         | 1.471525  | -1.059230 | -0.084357 |
| C                                         | 1.320999  | 0.323830  | -0.415375 |
| C                                         | 3.007201  | 0.193579  | -2.059835 |
| C                                         | 3.134622  | -1.178091 | -1.898060 |
| H                                         | 2.494263  | -2.845831 | -0.747220 |
| H                                         | 3.617888  | 0.746212  | -2.782028 |
| H                                         | 3.822877  | -1.760563 | -2.513589 |
| C                                         | 0.263011  | 1.328903  | 0.094481  |
| H                                         | 0.367545  | 2.182190  | -0.597756 |
| C                                         | -1.172095 | 0.853175  | -0.105713 |
| C                                         | -2.156887 | 0.983927  | 0.878952  |
| C                                         | -1.550301 | 0.329674  | -1.354858 |
| C                                         | -3.470225 | 0.562080  | 0.637653  |
| H                                         | -1.888310 | 1.417461  | 1.843151  |
| C                                         | -2.859169 | -0.084983 | -1.593649 |
| H                                         | -0.804433 | 0.233020  | -2.149068 |
| C                                         | -3.846671 | 0.013492  | -0.595999 |
| H                                         | -4.217983 | 0.665630  | 1.429753  |
| H                                         | -3.124067 | -0.496734 | -2.572480 |
| N                                         | 2.125811  | 0.899440  | -1.347217 |
| N                                         | 1.321423  | 2.760466  | 1.644248  |
| N                                         | 0.477803  | 1.837982  | 1.463805  |
| O                                         | 2.013968  | 3.215619  | 0.644077  |
| Li                                        | 2.441260  | 2.824540  | -0.999136 |
| C                                         | -5.254549 | -0.457637 | -0.861392 |
| H                                         | -5.921123 | -0.250029 | -0.010723 |
| H                                         | -5.678884 | 0.032362  | -1.754074 |
| H                                         | -5.280260 | -1.544358 | -1.052490 |
| C                                         | 0.759133  | -1.873726 | 1.037206  |
| C                                         | 0.515374  | -1.054577 | 2.316149  |
| H                                         | 1.456312  | -0.635531 | 2.706470  |
| H                                         | -0.172244 | -0.220161 | 2.170341  |
| H                                         | 0.088019  | -1.712502 | 3.090090  |
| C                                         | -0.579642 | -2.444998 | 0.516095  |
| H                                         | -1.320357 | -1.660572 | 0.325430  |
| H                                         | -0.430394 | -3.011072 | -0.417758 |
| H                                         | -1.004047 | -3.134190 | 1.264902  |
| C                                         | 1.634071  | -3.078996 | 1.468140  |
| H                                         | 1.700552  | -3.865355 | 0.701722  |
| H                                         | 2.656418  | -2.767799 | 1.737118  |
| H                                         | 1.181939  | -3.546178 | 2.356354  |
| 68                                        |           |           |           |
| B6_tBu-THF2 SCF Done: -1372.41945099 A.U. |           |           |           |
| C                                         | -0.768622 | -3.325352 | -1.517768 |
| C                                         | -1.167266 | -2.478857 | -0.464037 |
| C                                         | -0.467740 | -1.237835 | -0.385609 |
| C                                         | 0.944142  | -1.810423 | -2.172124 |
| C                                         | 0.266456  | -3.002127 | -2.392095 |

|    |           |           |           |
|----|-----------|-----------|-----------|
| H  | -1.270797 | -4.279981 | -1.662470 |
| H  | 1.809071  | -1.519383 | -2.777748 |
| H  | 0.552400  | -3.674461 | -3.203712 |
| C  | -0.761890 | -0.044416 | 0.532294  |
| H  | 0.034939  | 0.670655  | 0.285355  |
| C  | -2.033036 | 0.722730  | 0.192960  |
| C  | -3.738629 | 2.344231  | 0.821670  |
| C  | -3.641375 | 1.549282  | -1.441633 |
| C  | -4.262904 | 2.363039  | -0.482328 |
| H  | -4.197277 | 2.971421  | 1.592714  |
| H  | -4.020038 | 1.542847  | -2.468282 |
| N  | 0.577024  | -0.969112 | -1.204102 |
| N  | 0.517747  | -0.428402 | 2.455068  |
| N  | -0.653589 | -0.324839 | 1.976692  |
| O  | 1.544423  | -0.326538 | 1.676469  |
| Li | 2.004466  | 0.052232  | -0.090306 |
| C  | 2.089556  | 2.800508  | 0.783463  |
| O  | 1.948522  | 1.985908  | -0.389112 |
| C  | 1.092134  | 2.687366  | -1.305861 |
| C  | 0.160711  | 3.568919  | -0.443368 |
| C  | 0.698762  | 3.395511  | 0.996066  |
| H  | 2.427861  | 2.150498  | 1.602555  |
| H  | 2.848255  | 3.585431  | 0.599369  |
| H  | 1.714598  | 3.298094  | -1.984194 |
| H  | 0.560424  | 1.932025  | -1.902823 |
| H  | 0.212785  | 4.617814  | -0.770934 |
| H  | -0.886544 | 3.244697  | -0.518942 |
| H  | 0.731646  | 4.339226  | 1.559876  |
| H  | 0.075557  | 2.685655  | 1.560462  |
| C  | 4.561524  | -0.940612 | 0.798480  |
| O  | 3.836215  | -0.460978 | -0.354705 |
| C  | 4.710455  | 0.312552  | -1.207302 |
| C  | 6.090100  | 0.273647  | -0.541414 |
| C  | 5.740095  | 0.014640  | 0.930079  |
| H  | 3.866683  | -0.936930 | 1.650351  |
| H  | 4.902076  | -1.976322 | 0.611308  |
| H  | 4.707202  | -0.124866 | -2.219444 |
| H  | 4.305629  | 1.336433  | -1.267819 |
| H  | 6.687798  | -0.562341 | -0.940144 |
| H  | 6.655329  | 1.203462  | -0.702556 |
| H  | 6.571289  | -0.413314 | 1.509853  |
| H  | 5.416462  | 0.947171  | 1.422429  |
| C  | -2.202348 | -3.034316 | 0.553242  |
| C  | -5.460250 | 3.215557  | -0.821481 |
| H  | -5.613144 | 3.289752  | -1.909121 |
| H  | -6.383286 | 2.795512  | -0.384190 |
| H  | -5.353957 | 4.236991  | -0.420289 |
| C  | -2.644579 | 1.543229  | 1.153577  |
| H  | -2.256189 | 1.540357  | 2.173652  |
| C  | -2.545419 | 0.744776  | -1.111612 |
| H  | -2.087570 | 0.127894  | -1.888576 |
| C  | -3.210873 | -1.995542 | 1.077581  |
| H  | -3.945811 | -2.505725 | 1.721141  |
| H  | -2.726061 | -1.227311 | 1.687402  |
| H  | -3.760294 | -1.510897 | 0.257269  |
| C  | -3.034199 | -4.185000 | -0.057901 |
| H  | -3.796891 | -4.501878 | 0.669829  |
| H  | -3.557657 | -3.868425 | -0.974948 |

|                                              |           |           |           |
|----------------------------------------------|-----------|-----------|-----------|
| H                                            | -2.433954 | -5.077031 | -0.291276 |
| C                                            | -1.400070 | -3.607542 | 1.747027  |
| H                                            | -0.695323 | -4.385864 | 1.411480  |
| H                                            | -0.830883 | -2.818983 | 2.257733  |
| H                                            | -2.087683 | -4.063388 | 2.479366  |
| 42                                           |           |           |           |
| TS_B6_tBu SCF Done: -906.226134268 A.U.      |           |           |           |
| C                                            | -1.129209 | 0.374941  | 0.698135  |
| C                                            | -2.013453 | -0.599930 | 0.141477  |
| C                                            | -2.924144 | -1.187590 | 1.035840  |
| C                                            | -3.023428 | -0.781597 | 2.367999  |
| C                                            | -2.208285 | 0.260218  | 2.787796  |
| N                                            | -1.287433 | 0.800554  | 1.982174  |
| H                                            | -3.600453 | -1.968693 | 0.692210  |
| H                                            | -3.740638 | -1.243847 | 3.049207  |
| H                                            | -2.281914 | 0.668422  | 3.801744  |
| C                                            | 0.026436  | 1.000540  | -0.019123 |
| H                                            | 0.185350  | 1.601204  | -1.498783 |
| Li                                           | -0.260685 | 2.478029  | 2.230991  |
| N                                            | 0.100966  | 2.425737  | 0.330567  |
| N                                            | 0.332848  | 3.211243  | -0.627485 |
| O                                            | 0.492099  | 2.602739  | -1.804046 |
| C                                            | 1.324674  | 0.292877  | 0.076626  |
| C                                            | 1.414941  | -1.066314 | 0.471040  |
| C                                            | 2.556124  | 0.936540  | -0.208042 |
| C                                            | 2.636581  | -1.735132 | 0.537864  |
| H                                            | 0.507169  | -1.611426 | 0.735249  |
| C                                            | 3.774463  | 0.257783  | -0.130796 |
| H                                            | 2.567381  | 1.987725  | -0.499928 |
| C                                            | 3.850483  | -1.095456 | 0.233669  |
| H                                            | 2.647074  | -2.785910 | 0.846813  |
| H                                            | 4.695645  | 0.802659  | -0.362924 |
| C                                            | -2.107972 | -0.924043 | -1.373394 |
| C                                            | 5.163319  | -1.837979 | 0.276241  |
| H                                            | 5.327512  | -2.424643 | -0.646293 |
| H                                            | 6.016987  | -1.149043 | 0.377710  |
| H                                            | 5.200691  | -2.550386 | 1.117066  |
| C                                            | -2.533663 | 0.365980  | -2.114352 |
| H                                            | -3.502968 | 0.732748  | -1.739047 |
| H                                            | -1.794967 | 1.168966  | -1.994496 |
| H                                            | -2.641734 | 0.164123  | -3.192983 |
| C                                            | -0.788653 | -1.456356 | -1.968862 |
| H                                            | 0.018598  | -0.718643 | -1.913268 |
| H                                            | -0.455638 | -2.368817 | -1.450648 |
| H                                            | -0.941634 | -1.710315 | -3.030683 |
| C                                            | -3.185929 | -1.990344 | -1.660003 |
| H                                            | -2.957190 | -2.952346 | -1.173723 |
| H                                            | -4.191059 | -1.671548 | -1.342591 |
| H                                            | -3.231326 | -2.173794 | -2.744700 |
| 68                                           |           |           |           |
| TS_B6_tBu-THF2 SCF Done: -1372.37918760 A.U. |           |           |           |
| C                                            | -1.016925 | -1.408790 | -0.186376 |
| C                                            | -2.305538 | -1.930993 | -0.535552 |
| C                                            | -2.353415 | -2.726704 | -1.694368 |
| C                                            | -1.211832 | -3.089051 | -2.407910 |
| C                                            | 0.008948  | -2.638571 | -1.918282 |

|    |           |           |           |
|----|-----------|-----------|-----------|
| N  | 0.091981  | -1.818461 | -0.871665 |
| H  | -3.315929 | -3.106438 | -2.042096 |
| H  | -1.269397 | -3.720705 | -3.296628 |
| H  | 0.953457  | -2.925693 | -2.395701 |
| C  | -0.749271 | -0.414545 | 0.881791  |
| H  | -1.083609 | -0.589383 | 2.393290  |
| Li | 1.783591  | -0.922033 | -0.189452 |
| N  | 0.633882  | -0.543292 | 1.382975  |
| N  | 0.732982  | -0.609021 | 2.634446  |
| O  | -0.426412 | -0.539186 | 3.288842  |
| C  | -1.158554 | 0.989689  | 0.666978  |
| C  | -1.923068 | 1.400368  | -0.452669 |
| C  | -0.782095 | 2.022005  | 1.566262  |
| C  | -2.306648 | 2.729673  | -0.641386 |
| H  | -2.210117 | 0.664330  | -1.204648 |
| C  | -1.165682 | 3.348300  | 1.365808  |
| H  | -0.180681 | 1.783142  | 2.444461  |
| C  | -1.944088 | 3.740383  | 0.263348  |
| H  | -2.893995 | 2.988544  | -1.528775 |
| H  | -0.845930 | 4.104430  | 2.090618  |
| C  | 4.626735  | -1.284240 | -0.718632 |
| O  | 3.541454  | -1.588598 | 0.188815  |
| C  | 4.026178  | -1.560332 | 1.545863  |
| C  | 5.160068  | -0.545777 | 1.510124  |
| C  | 5.818386  | -0.868580 | 0.160408  |
| H  | 4.845764  | -2.172135 | -1.335178 |
| H  | 4.283913  | -0.473845 | -1.381119 |
| H  | 3.188097  | -1.289585 | 2.203530  |
| H  | 4.392842  | -2.564969 | 1.830291  |
| H  | 4.744588  | 0.475683  | 1.509850  |
| H  | 5.846561  | -0.641590 | 2.364238  |
| H  | 6.371443  | -0.019358 | -0.266979 |
| H  | 6.522879  | -1.707730 | 0.275264  |
| C  | 2.440553  | 1.893871  | -0.509421 |
| O  | 2.037040  | 0.694316  | -1.204535 |
| C  | 1.281520  | 1.026073  | -2.389475 |
| C  | 1.501313  | 2.521017  | -2.601592 |
| C  | 1.646214  | 3.022727  | -1.159713 |
| H  | 2.224141  | 1.767887  | 0.562560  |
| H  | 3.529794  | 2.029766  | -0.639513 |
| H  | 1.641868  | 0.399592  | -3.220622 |
| H  | 0.218104  | 0.797502  | -2.209872 |
| H  | 2.429445  | 2.699017  | -3.170151 |
| H  | 0.666955  | 2.989916  | -3.143747 |
| H  | 2.156181  | 3.994019  | -1.079439 |
| H  | 0.657008  | 3.107812  | -0.685608 |
| C  | -3.653775 | -1.786958 | 0.233241  |
| C  | -3.588843 | -1.101033 | 1.609847  |
| H  | -2.912733 | -1.628800 | 2.296770  |
| H  | -3.280355 | -0.051437 | 1.549515  |
| H  | -4.596704 | -1.123643 | 2.056382  |
| C  | -4.668522 | -1.009587 | -0.636942 |
| H  | -5.652689 | -0.985862 | -0.140066 |
| H  | -4.346907 | 0.031200  | -0.789700 |
| H  | -4.807429 | -1.473605 | -1.625891 |
| C  | -4.209443 | -3.212268 | 0.495843  |
| H  | -5.150446 | -3.149550 | 1.066108  |
| H  | -4.427612 | -3.765862 | -0.429110 |

|                                           |           |           |           |
|-------------------------------------------|-----------|-----------|-----------|
| H                                         | -3.495020 | -3.808755 | 1.086403  |
| C                                         | -2.383165 | 5.171307  | 0.075095  |
| H                                         | -3.316157 | 5.386150  | 0.628086  |
| H                                         | -1.623794 | 5.881032  | 0.441988  |
| H                                         | -2.577177 | 5.400272  | -0.985160 |
| 39                                        |           |           |           |
| B6_mes SCF Done: -866.989146390 A.U.      |           |           |           |
| C                                         | 2.425452  | -1.923158 | 1.521385  |
| C                                         | 1.437767  | -0.962801 | 1.266851  |
| C                                         | 1.533484  | -0.242431 | 0.052318  |
| C                                         | 3.516390  | -1.334108 | -0.517336 |
| C                                         | 3.470606  | -2.132352 | 0.620440  |
| H                                         | 2.374945  | -2.508336 | 2.444015  |
| H                                         | 4.335386  | -1.426864 | -1.238423 |
| H                                         | 4.243373  | -2.880863 | 0.806263  |
| C                                         | 0.513780  | 0.822332  | -0.366913 |
| H                                         | 0.695112  | 1.009216  | -1.438530 |
| C                                         | -0.954001 | 0.381287  | -0.266490 |
| C                                         | -1.967835 | 1.050022  | 0.468284  |
| C                                         | -1.316008 | -0.764880 | -1.030631 |
| C                                         | -3.272224 | 0.519342  | 0.465222  |
| C                                         | -2.629386 | -1.248844 | -0.998906 |
| C                                         | -3.629544 | -0.629041 | -0.242900 |
| H                                         | -4.041171 | 1.039542  | 1.044175  |
| H                                         | -2.879099 | -2.134549 | -1.591780 |
| N                                         | 2.576744  | -0.415802 | -0.787221 |
| N                                         | 1.698579  | 2.845607  | -0.100436 |
| N                                         | 0.852688  | 2.045469  | 0.392874  |
| O                                         | 2.261451  | 2.584731  | -1.246806 |
| Li                                        | 2.909670  | 1.133972  | -1.984266 |
| C                                         | -5.033749 | -1.178591 | -0.217957 |
| H                                         | -5.707331 | -0.551031 | 0.385145  |
| H                                         | -5.453870 | -1.247180 | -1.235885 |
| H                                         | -5.054676 | -2.198509 | 0.203212  |
| C                                         | 0.340057  | -0.726311 | 2.269813  |
| H                                         | 0.153496  | 0.347715  | 2.402052  |
| H                                         | -0.607870 | -1.185814 | 1.948424  |
| H                                         | 0.611441  | -1.155834 | 3.245641  |
| C                                         | -1.777219 | 2.319635  | 1.272984  |
| H                                         | -1.082626 | 2.183574  | 2.113792  |
| H                                         | -1.357624 | 3.134124  | 0.667231  |
| H                                         | -2.745833 | 2.651457  | 1.677988  |
| C                                         | -0.326174 | -1.507871 | -1.902280 |
| H                                         | 0.308775  | -0.829056 | -2.492068 |
| H                                         | 0.356151  | -2.137828 | -1.308946 |
| H                                         | -0.853646 | -2.169825 | -2.604892 |
| 65                                        |           |           |           |
| B6_mes-THF2 SCF Done: -1333.09827184 A.U. |           |           |           |
| C                                         | -0.330128 | -3.494912 | -1.745630 |
| C                                         | -0.973852 | -2.690817 | -0.796157 |
| C                                         | -0.314089 | -1.500404 | -0.406712 |
| C                                         | 1.511031  | -1.973489 | -1.773077 |
| C                                         | 0.921216  | -3.139111 | -2.254042 |
| H                                         | -0.814290 | -4.417102 | -2.080321 |
| H                                         | 2.508531  | -1.660002 | -2.098160 |
| H                                         | 1.433718  | -3.760826 | -2.991286 |

|    |           |           |           |
|----|-----------|-----------|-----------|
| C  | -0.874831 | -0.538561 | 0.642893  |
| H  | -0.268470 | 0.376764  | 0.560878  |
| C  | -2.329177 | -0.099643 | 0.420154  |
| C  | -3.372095 | -0.192300 | 1.378923  |
| C  | -2.618989 | 0.509421  | -0.834715 |
| C  | -4.659569 | 0.261177  | 1.032143  |
| C  | -3.916787 | 0.946784  | -1.126292 |
| C  | -4.965291 | 0.820336  | -0.209538 |
| H  | -5.454873 | 0.173824  | 1.778529  |
| H  | -4.111329 | 1.406977  | -2.100506 |
| N  | 0.904018  | -1.181394 | -0.881280 |
| N  | 0.510538  | -0.967824 | 2.506931  |
| N  | -0.606633 | -1.185413 | 1.947256  |
| O  | 1.390698  | -0.196861 | 1.946625  |
| Li | 1.954684  | 0.178744  | 0.233077  |
| C  | 1.119199  | 2.915268  | 0.882428  |
| O  | 1.698047  | 2.063822  | -0.116895 |
| C  | 1.630376  | 2.747128  | -1.378418 |
| C  | 0.467293  | 3.760991  | -1.260024 |
| C  | -0.071454 | 3.546841  | 0.170671  |
| H  | 0.867086  | 2.284464  | 1.745760  |
| H  | 1.858420  | 3.678393  | 1.195112  |
| H  | 2.592309  | 3.254388  | -1.571620 |
| H  | 1.477742  | 1.988563  | -2.161106 |
| H  | 0.841601  | 4.787569  | -1.390551 |
| H  | -0.307005 | 3.588390  | -2.020987 |
| H  | -0.404956 | 4.479113  | 0.649424  |
| H  | -0.916656 | 2.841004  | 0.169352  |
| C  | 4.417983  | -1.180861 | 0.732987  |
| O  | 3.814995  | -0.180508 | -0.118404 |
| C  | 4.765242  | 0.860287  | -0.426767 |
| C  | 6.115625  | 0.333800  | 0.055571  |
| C  | 5.704743  | -0.542086 | 1.245987  |
| H  | 3.697613  | -1.431538 | 1.526137  |
| H  | 4.623030  | -2.085799 | 0.132736  |
| H  | 4.730535  | 1.061248  | -1.509452 |
| H  | 4.470717  | 1.780853  | 0.106771  |
| H  | 6.590151  | -0.282283 | -0.726286 |
| H  | 6.809447  | 1.144506  | 0.322734  |
| H  | 6.462488  | -1.288159 | 1.527148  |
| H  | 5.491664  | 0.084918  | 2.127703  |
| C  | -2.305207 | -3.103362 | -0.225562 |
| H  | -2.325497 | -2.960318 | 0.863478  |
| H  | -3.128755 | -2.505447 | -0.647448 |
| H  | -2.509173 | -4.162590 | -0.442770 |
| C  | -6.355868 | 1.292366  | -0.553476 |
| H  | -6.364437 | 2.369967  | -0.791462 |
| H  | -6.746635 | 0.768168  | -1.442430 |
| H  | -7.060908 | 1.124052  | 0.274750  |
| C  | -1.566160 | 0.712097  | -1.903220 |
| H  | -1.894229 | 1.472500  | -2.627354 |
| H  | -0.602698 | 1.031310  | -1.487983 |
| H  | -1.371451 | -0.214615 | -2.467321 |
| C  | -3.225486 | -0.742361 | 2.783548  |
| H  | -2.413942 | -0.252814 | 3.338039  |
| H  | -4.165085 | -0.597057 | 3.339344  |
| H  | -2.986442 | -1.815423 | 2.788912  |

39

TS\_B6\_mes SCF Done: -866.946528409 A.U.

|    |           |           |           |
|----|-----------|-----------|-----------|
| C  | 1.618381  | -0.127825 | 0.025222  |
| C  | 1.742738  | -1.078427 | 1.095256  |
| C  | 2.922327  | -1.807206 | 1.185344  |
| C  | 3.970106  | -1.617883 | 0.265556  |
| C  | 3.778722  | -0.677074 | -0.734384 |
| N  | 2.644932  | 0.031838  | -0.867921 |
| H  | 3.042249  | -2.524075 | 2.003797  |
| H  | 4.903041  | -2.180054 | 0.336360  |
| H  | 4.561068  | -0.485229 | -1.477918 |
| C  | 0.458802  | 0.739133  | -0.115641 |
| H  | 0.936849  | 1.923076  | 0.865830  |
| Li | 2.033746  | 1.123046  | -2.405636 |
| N  | 0.677875  | 1.793623  | -1.136067 |
| N  | 1.138425  | 2.882780  | -0.680744 |
| O  | 1.344313  | 2.911316  | 0.623986  |
| C  | -0.944437 | 0.215652  | -0.141928 |
| C  | -1.279062 | -1.032062 | -0.739029 |
| C  | -2.003755 | 0.998207  | 0.403471  |
| C  | -2.608377 | -1.487400 | -0.711892 |
| C  | -3.317045 | 0.513710  | 0.388533  |
| C  | -3.645398 | -0.737969 | -0.149701 |
| H  | -2.840440 | -2.455564 | -1.167257 |
| H  | -4.111732 | 1.130395  | 0.821059  |
| C  | 0.653027  | -1.240327 | 2.117773  |
| H  | 0.304046  | -0.255867 | 2.472697  |
| H  | -0.233885 | -1.745700 | 1.702202  |
| H  | 1.003780  | -1.824869 | 2.981771  |
| C  | -5.066923 | -1.241644 | -0.119921 |
| H  | -5.400866 | -1.430209 | 0.915576  |
| H  | -5.764873 | -0.502209 | -0.547766 |
| H  | -5.179519 | -2.180857 | -0.682943 |
| C  | -1.743323 | 2.348737  | 1.021726  |
| H  | -0.999990 | 2.285352  | 1.832399  |
| H  | -1.344639 | 3.067402  | 0.288383  |
| H  | -2.666668 | 2.777606  | 1.439082  |
| C  | -0.258370 | -1.901668 | -1.437944 |
| H  | 0.412605  | -1.313986 | -2.081694 |
| H  | 0.387388  | -2.445594 | -0.729148 |
| H  | -0.757241 | -2.652694 | -2.068937 |

65

TS\_B6\_mes-THF2 SCF Done: -1333.06019461 A.U.

|    |           |           |           |
|----|-----------|-----------|-----------|
| C  | 0.104149  | 1.648399  | -0.838077 |
| C  | 0.845573  | 2.627831  | -1.577912 |
| C  | 0.273458  | 3.134669  | -2.740886 |
| C  | -0.997364 | 2.714175  | -3.167915 |
| C  | -1.656751 | 1.776805  | -2.383218 |
| N  | -1.125782 | 1.251175  | -1.270415 |
| H  | 0.817341  | 3.890881  | -3.315866 |
| H  | -1.457913 | 3.113148  | -4.073851 |
| H  | -2.654846 | 1.416283  | -2.659983 |
| C  | 0.581714  | 1.104458  | 0.432717  |
| H  | 0.090212  | 2.268569  | 1.313798  |
| Li | -1.700329 | -0.441955 | -0.280502 |
| N  | -0.473052 | 0.357290  | 1.161476  |
| N  | -1.157406 | 1.076556  | 1.947659  |



|                                  |           |           |           |
|----------------------------------|-----------|-----------|-----------|
| O                                | -0.826391 | 2.356223  | 1.977432  |
| C                                | 1.918313  | 0.449536  | 0.575737  |
| C                                | 2.545658  | -0.270017 | -0.482625 |
| C                                | 2.579901  | 0.479996  | 1.839761  |
| C                                | 3.802030  | -0.864816 | -0.276536 |
| C                                | 3.821400  | -0.147023 | 2.002720  |
| C                                | 4.464946  | -0.815880 | 0.953242  |
| H                                | 4.266185  | -1.406867 | -1.106940 |
| H                                | 4.308527  | -0.103855 | 2.982489  |
| C                                | -3.924308 | -1.453039 | 1.198259  |
| O                                | -3.529946 | -0.453682 | 0.230439  |
| C                                | -4.185773 | 0.804211  | 0.511281  |
| C                                | -4.742149 | 0.656519  | 1.922596  |
| C                                | -5.090344 | -0.836441 | 1.967692  |
| H                                | -4.185251 | -2.379308 | 0.662462  |
| H                                | -3.068133 | -1.661296 | 1.864394  |
| H                                | -3.447383 | 1.612827  | 0.409128  |
| H                                | -4.988931 | 0.959739  | -0.231759 |
| H                                | -3.953584 | 0.887318  | 2.656225  |
| H                                | -5.602542 | 1.316229  | 2.107645  |
| H                                | -5.174538 | -1.237893 | 2.988257  |
| H                                | -6.041191 | -1.026111 | 1.442388  |
| C                                | -0.113784 | -2.893340 | 0.010156  |
| O                                | -1.036420 | -2.138939 | -0.811091 |
| C                                | -1.253955 | -2.803763 | -2.073390 |
| C                                | -0.624855 | -4.186634 | -1.916415 |
| C                                | 0.521420  | -3.905424 | -0.936339 |
| H                                | 0.599567  | -2.191981 | 0.464584  |
| H                                | -0.682780 | -3.390735 | 0.816005  |
| H                                | -2.336126 | -2.830885 | -2.277221 |
| H                                | -0.761127 | -2.220422 | -2.871543 |
| H                                | -1.348054 | -4.887850 | -1.468167 |
| H                                | -0.290910 | -4.604208 | -2.877559 |
| H                                | 0.878798  | -4.802211 | -0.409539 |
| H                                | 1.375882  | -3.449449 | -1.461748 |
| C                                | 2.178372  | 3.122652  | -1.090115 |
| H                                | 2.965931  | 2.357992  | -1.191417 |
| H                                | 2.498979  | 4.016872  | -1.646075 |
| H                                | 2.131489  | 3.369415  | -0.015945 |
| C                                | 1.898534  | -0.468623 | -1.834749 |
| H                                | 0.835317  | -0.724635 | -1.741938 |
| H                                | 1.952727  | 0.433668  | -2.465236 |
| H                                | 2.397970  | -1.280014 | -2.385201 |
| C                                | 1.972920  | 1.186457  | 3.025709  |
| H                                | 1.696510  | 2.224004  | 2.782175  |
| H                                | 1.047033  | 0.694268  | 3.364887  |
| H                                | 2.671305  | 1.206354  | 3.875827  |
| C                                | 5.820596  | -1.447292 | 1.151550  |
| H                                | 6.085835  | -2.114907 | 0.317071  |
| H                                | 6.611396  | -0.679415 | 1.225071  |
| H                                | 5.860798  | -2.034116 | 2.084360  |
| 36                               |           |           |           |
| B7 SCF Done: -903.652198015 A.U. |           |           |           |
| C                                | -1.500441 | -1.406079 | -1.407806 |
| C                                | -0.394415 | -0.632672 | -1.152003 |
| C                                | -0.449980 | 0.356684  | -0.129170 |
| C                                | -2.670476 | -0.189600 | 0.350672  |

|    |           |           |           |
|----|-----------|-----------|-----------|
| C  | -2.686168 | -1.215813 | -0.647126 |
| H  | -1.480875 | -2.171299 | -2.188685 |
| H  | 0.530471  | -0.765284 | -1.714384 |
| C  | 0.771321  | 1.230281  | 0.140990  |
| H  | 0.636932  | 1.682947  | 1.138983  |
| C  | 2.053518  | 0.408713  | 0.168593  |
| C  | 3.039826  | 0.508495  | -0.819109 |
| C  | 2.255225  | -0.501832 | 1.220298  |
| C  | 4.194087  | -0.282303 | -0.757180 |
| H  | 2.897510  | 1.214617  | -1.637878 |
| C  | 3.404684  | -1.288738 | 1.277900  |
| H  | 1.496182  | -0.595811 | 2.003341  |
| C  | 4.399862  | -1.194213 | 0.287477  |
| H  | 4.950760  | -0.185234 | -1.541675 |
| H  | 3.537944  | -1.989827 | 2.107717  |
| N  | -1.555897 | 0.576935  | 0.574191  |
| N  | 0.171308  | 3.340582  | -0.734549 |
| N  | 0.851759  | 2.288693  | -0.893691 |
| O  | -0.602765 | 3.463306  | 0.302119  |
| Li | -1.601938 | 2.430540  | 1.296337  |
| C  | 5.643879  | -2.043093 | 0.368013  |
| H  | 6.281180  | -1.918183 | -0.520417 |
| H  | 6.246982  | -1.780344 | 1.254413  |
| H  | 5.392753  | -3.113234 | 0.460144  |
| C  | -4.990070 | -1.742558 | -0.074685 |
| C  | -3.866163 | -1.983170 | -0.839583 |
| C  | -3.841567 | 0.035698  | 1.123264  |
| C  | -4.974900 | -0.725226 | 0.912548  |
| H  | -5.895982 | -2.334326 | -0.227067 |
| H  | -3.866548 | -2.764176 | -1.604649 |
| H  | -3.829144 | 0.814760  | 1.890641  |
| H  | -5.869734 | -0.543588 | 1.513344  |

62

B7-THF2 SCF Done: -1368.81680917 A.U.

|   |           |           |           |
|---|-----------|-----------|-----------|
| C | -0.218826 | 3.487086  | -0.306319 |
| C | -1.026075 | 2.458031  | -0.724933 |
| C | -0.591497 | 1.110357  | -0.556174 |
| C | 1.399956  | 1.815936  | 0.422973  |
| C | 1.033795  | 3.195047  | 0.301265  |
| H | -0.527412 | 4.529309  | -0.426870 |
| H | -1.997691 | 2.649196  | -1.182787 |
| C | -1.480692 | -0.028291 | -1.037750 |
| H | -1.066423 | -0.956178 | -0.616353 |
| C | -2.907449 | 0.120493  | -0.529246 |
| C | -3.985191 | 0.424034  | -1.368809 |
| C | -3.162973 | -0.051169 | 0.842884  |
| C | -5.279889 | 0.553786  | -0.850734 |
| H | -3.799465 | 0.551607  | -2.435923 |
| C | -4.453235 | 0.079045  | 1.355847  |
| H | -2.334656 | -0.288095 | 1.517048  |
| C | -5.540547 | 0.384331  | 0.516506  |
| H | -6.105562 | 0.791598  | -1.528428 |
| H | -4.624779 | -0.061205 | 2.427704  |
| N | 0.586272  | 0.810197  | -0.026770 |
| N | -0.485561 | -0.686131 | -3.066694 |
| N | -1.449865 | -0.073559 | -2.517599 |
| O | 0.439963  | -1.221350 | -2.339915 |

|                                     |           |           |           |
|-------------------------------------|-----------|-----------|-----------|
| Li                                  | 1.261956  | -1.063742 | -0.710480 |
| C                                   | -6.934284 | 0.505840  | 1.080321  |
| H                                   | -7.647246 | 0.876848  | 0.328434  |
| H                                   | -7.303835 | -0.470700 | 1.439231  |
| H                                   | -6.959579 | 1.192262  | 1.943195  |
| C                                   | 3.120131  | 3.847301  | 1.369148  |
| C                                   | 1.918943  | 4.196429  | 0.783843  |
| C                                   | 2.641053  | 1.486208  | 1.032864  |
| C                                   | 3.479708  | 2.481378  | 1.495213  |
| H                                   | 3.796918  | 4.621610  | 1.739054  |
| H                                   | 1.629866  | 5.246281  | 0.684044  |
| H                                   | 2.912497  | 0.433753  | 1.116617  |
| H                                   | 4.430716  | 2.214906  | 1.964145  |
| C                                   | 4.124361  | -0.469450 | -1.412607 |
| O                                   | 3.175478  | -1.261410 | -0.686025 |
| C                                   | 3.920052  | -2.260939 | 0.016225  |
| C                                   | 5.145509  | -1.511353 | 0.543733  |
| C                                   | 5.390084  | -0.420249 | -0.530145 |
| H                                   | 4.328334  | -0.951785 | -2.385606 |
| H                                   | 3.670307  | 0.514515  | -1.597871 |
| H                                   | 3.266279  | -2.685365 | 0.790145  |
| H                                   | 4.210459  | -3.067594 | -0.684492 |
| H                                   | 4.914222  | -1.053448 | 1.518104  |
| H                                   | 6.008142  | -2.179230 | 0.682483  |
| H                                   | 5.515134  | 0.570105  | -0.069191 |
| H                                   | 6.289201  | -0.625724 | -1.129292 |
| C                                   | 0.248345  | -2.062557 | 1.909929  |
| O                                   | 0.664353  | -2.405058 | 0.570643  |
| C                                   | -0.087920 | -3.534564 | 0.084154  |
| C                                   | -1.354447 | -3.549083 | 0.930867  |
| C                                   | -0.820953 | -3.090737 | 2.295243  |
| H                                   | 1.126481  | -2.082482 | 2.576375  |
| H                                   | -0.144994 | -1.032978 | 1.892768  |
| H                                   | -0.261338 | -3.381742 | -0.991365 |
| H                                   | 0.505048  | -4.457402 | 0.225388  |
| H                                   | -2.083519 | -2.822518 | 0.536876  |
| H                                   | -1.833614 | -4.538685 | 0.958818  |
| H                                   | -1.597103 | -2.658338 | 2.943812  |
| H                                   | -0.364264 | -3.939763 | 2.829417  |
| 36                                  |           |           |           |
| TS_B7 SCF Done: -903.603355117 A.U. |           |           |           |
| C                                   | -1.554287 | -2.056105 | -0.033591 |
| C                                   | -0.415361 | -1.301847 | -0.006634 |
| C                                   | -0.488068 | 0.138444  | 0.002058  |
| C                                   | -2.847830 | 0.003013  | -0.058929 |
| C                                   | -2.835284 | -1.426530 | -0.061278 |
| H                                   | -1.495123 | -3.148093 | -0.056849 |
| H                                   | 0.559166  | -1.786548 | -0.019426 |
| C                                   | 0.733598  | 0.944638  | 0.017857  |
| H                                   | 0.347109  | 1.859555  | 1.129210  |
| C                                   | 2.077009  | 0.293836  | -0.018697 |
| C                                   | 2.978506  | 0.485721  | -1.081973 |
| C                                   | 2.509940  | -0.507732 | 1.058068  |
| C                                   | 4.242599  | -0.112024 | -1.074760 |
| H                                   | 2.683700  | 1.113205  | -1.925319 |
| C                                   | 3.766880  | -1.112215 | 1.054264  |
| H                                   | 1.845029  | -0.653932 | 1.914028  |

|    |           |           |           |
|----|-----------|-----------|-----------|
| C  | 4.663854  | -0.926031 | -0.012579 |
| H  | 4.916307  | 0.056595  | -1.920665 |
| H  | 4.066237  | -1.731867 | 1.905633  |
| N  | -1.695651 | 0.747011  | -0.003159 |
| N  | 0.238168  | 3.163444  | -0.232838 |
| N  | 0.692276  | 2.159514  | -0.801825 |
| O  | -0.149253 | 2.923060  | 1.087802  |
| Li | -1.936819 | 2.552519  | 0.737424  |
| C  | 6.031126  | -1.562741 | 0.008922  |
| H  | 6.662630  | -1.125252 | 0.802152  |
| H  | 5.968097  | -2.644762 | 0.213761  |
| H  | 6.557973  | -1.428025 | -0.948099 |
| C  | -5.267932 | -1.477258 | -0.135869 |
| C  | -4.055011 | -2.144474 | -0.100075 |
| C  | -4.107883 | 0.660606  | -0.108206 |
| C  | -5.287678 | -0.063955 | -0.141051 |
| H  | -6.206183 | -2.036415 | -0.166375 |
| H  | -4.020002 | -3.237702 | -0.102279 |
| H  | -4.145089 | 1.754933  | -0.140345 |
| H  | -6.243986 | 0.464406  | -0.180507 |

62

TS\_B7-THF2 SCF Done: -1368.77775688 A.U.

|    |           |           |           |
|----|-----------|-----------|-----------|
| C  | -0.624618 | 3.674678  | 0.223655  |
| C  | 0.352663  | 2.846856  | 0.706488  |
| C  | 0.115975  | 1.430671  | 0.806759  |
| C  | -2.052077 | 1.718844  | -0.052545 |
| C  | -1.883248 | 3.134526  | -0.183007 |
| H  | -0.460087 | 4.754191  | 0.158076  |
| H  | 1.307061  | 3.248514  | 1.050476  |
| C  | 1.126262  | 0.544151  | 1.381707  |
| H  | 1.329267  | 0.570431  | 2.859779  |
| C  | 2.506523  | 0.501048  | 0.827342  |
| C  | 3.461638  | -0.396667 | 1.363813  |
| C  | 2.927497  | 1.269186  | -0.281704 |
| H  | 3.194691  | -1.019979 | 2.219204  |
| C  | 4.219066  | 1.160120  | -0.803557 |
| H  | 2.228373  | 1.947660  | -0.772923 |
| C  | 5.159812  | 0.268666  | -0.266023 |
| H  | 4.492857  | 1.772671  | -1.668716 |
| N  | -1.059911 | 0.910786  | 0.424107  |
| N  | 0.656995  | -1.151467 | 2.859795  |
| N  | 0.566064  | -0.802959 | 1.651850  |
| O  | 1.246879  | -0.275458 | 3.651492  |
| Li | -0.870623 | -1.130033 | 0.298117  |
| C  | -4.138259 | 3.334762  | -1.079416 |
| C  | -2.944041 | 3.921779  | -0.695827 |
| C  | -3.287589 | 1.142322  | -0.456156 |
| C  | -4.304474 | 1.934247  | -0.959453 |
| H  | -4.951581 | 3.947955  | -1.475535 |
| H  | -2.800777 | 5.002590  | -0.785531 |
| H  | -3.408086 | 0.062193  | -0.362051 |
| H  | -5.247280 | 1.473096  | -1.266922 |
| C  | 4.743582  | -0.510456 | 0.827310  |
| H  | 5.443030  | -1.225221 | 1.272974  |
| C  | 6.559422  | 0.161370  | -0.817717 |
| H  | 6.618957  | 0.538156  | -1.850994 |
| H  | 7.275394  | 0.748723  | -0.214427 |

|   |           |           |           |
|---|-----------|-----------|-----------|
| H | 6.918234  | -0.880844 | -0.813459 |
| C | -3.403982 | -2.107693 | 1.541548  |
| O | -2.413250 | -2.215069 | 0.507100  |
| C | -2.931352 | -3.118944 | -0.476740 |
| C | -4.407079 | -2.734828 | -0.594858 |
| C | -4.767834 | -2.242097 | 0.830099  |
| H | -3.248343 | -2.919761 | 2.274060  |
| H | -3.254711 | -1.144144 | 2.049901  |
| H | -2.345176 | -2.985892 | -1.396692 |
| H | -2.809552 | -4.160073 | -0.121328 |
| H | -4.523424 | -1.922206 | -1.328413 |
| H | -5.027161 | -3.580231 | -0.926680 |
| H | -5.297614 | -1.279146 | 0.795820  |
| H | -5.412222 | -2.957397 | 1.361615  |
| C | 1.032134  | -2.630441 | -1.265193 |
| O | 0.003073  | -1.619200 | -1.349038 |
| C | 0.349952  | -0.631067 | -2.346105 |
| C | 1.560247  | -1.199567 | -3.084356 |
| C | 2.234706  | -2.040986 | -1.993513 |
| H | 1.223602  | -2.843259 | -0.202329 |
| H | 0.667311  | -3.551917 | -1.754446 |
| H | -0.525846 | -0.461556 | -2.992181 |
| H | 0.596642  | 0.314202  | -1.835957 |
| H | 1.237655  | -1.839819 | -3.922181 |
| H | 2.209161  | -0.406872 | -3.485023 |
| H | 2.906367  | -2.816815 | -2.389496 |
| H | 2.809937  | -1.394718 | -1.312973 |

36

B8 SCF Done: -1201.51677079 A.U.

|    |           |           |           |
|----|-----------|-----------|-----------|
| C  | -2.069719 | -1.662068 | -1.038873 |
| C  | -1.003261 | -0.852070 | -0.731179 |
| C  | -1.215060 | 0.324021  | 0.042700  |
| C  | -3.505583 | -0.113955 | 0.177299  |
| C  | -3.370696 | -1.321263 | -0.579769 |
| H  | -1.930433 | -2.569737 | -1.632355 |
| H  | 0.004906  | -1.096797 | -1.067244 |
| C  | -0.037971 | 1.241365  | 0.362774  |
| H  | -0.333628 | 1.872446  | 1.218584  |
| C  | 1.194467  | 0.447236  | 0.772560  |
| C  | 2.317377  | 0.339835  | -0.051923 |
| C  | 1.197936  | -0.216080 | 2.011895  |
| C  | 3.419168  | -0.425303 | 0.355425  |
| H  | 2.322418  | 0.859729  | -1.010202 |
| C  | 2.297056  | -0.974252 | 2.415860  |
| H  | 0.324200  | -0.136659 | 2.665364  |
| C  | 3.417978  | -1.085740 | 1.586159  |
| H  | 2.285239  | -1.482104 | 3.383326  |
| N  | -2.425416 | 0.681417  | 0.458793  |
| N  | -0.398064 | 3.145938  | -0.986145 |
| N  | 0.264056  | 2.083628  | -0.818573 |
| O  | -1.341411 | 3.460203  | -0.151341 |
| Li | -2.566265 | 2.638703  | 0.787587  |
| C  | -5.761272 | -1.717361 | -0.379458 |
| C  | -4.522287 | -2.110268 | -0.844579 |
| C  | -4.792962 | 0.265545  | 0.643611  |
| C  | -5.894806 | -0.520584 | 0.369174  |
| H  | -6.644665 | -2.326184 | -0.586803 |

|                                       |           |           |           |
|---------------------------------------|-----------|-----------|-----------|
| H                                     | -4.407553 | -3.030378 | -1.423689 |
| H                                     | -4.895253 | 1.184627  | 1.227557  |
| H                                     | -6.880381 | -0.219789 | 0.733596  |
| H                                     | 4.281080  | -1.677577 | 1.894732  |
| C                                     | 4.595846  | -0.524172 | -0.577873 |
| F                                     | 5.099251  | 0.690634  | -0.882024 |
| F                                     | 5.605811  | -1.253002 | -0.068422 |
| F                                     | 4.253033  | -1.095578 | -1.753580 |
| 62                                    |           |           |           |
| B8-THF2 SCF Done: -1666.68135176 A.U. |           |           |           |
| C                                     | -0.284729 | 3.475410  | 0.010233  |
| C                                     | 0.542606  | 2.419128  | 0.303767  |
| C                                     | 0.042248  | 1.087786  | 0.204518  |
| C                                     | -2.050208 | 1.860239  | -0.461319 |
| C                                     | -1.624134 | 3.226183  | -0.398467 |
| H                                     | 0.072374  | 4.506522  | 0.081597  |
| H                                     | 1.577091  | 2.576752  | 0.612945  |
| C                                     | 0.957375  | -0.076974 | 0.556459  |
| H                                     | 0.454869  | -0.999756 | 0.224345  |
| C                                     | 2.287963  | 0.016714  | -0.177253 |
| C                                     | 3.507117  | 0.081185  | 0.502126  |
| C                                     | 2.297676  | 0.016432  | -1.583703 |
| C                                     | 4.711022  | 0.145673  | -0.213333 |
| H                                     | 3.502440  | 0.075559  | 1.592290  |
| C                                     | 3.497190  | 0.079084  | -2.293521 |
| H                                     | 1.349941  | -0.033953 | -2.126688 |
| C                                     | 4.716281  | 0.145477  | -1.610424 |
| H                                     | 3.486453  | 0.073775  | -3.386283 |
| N                                     | -1.210164 | 0.827015  | -0.140986 |
| N                                     | 0.276092  | -0.650302 | 2.733310  |
| N                                     | 1.171198  | -0.103661 | 2.020076  |
| O                                     | -0.782793 | -1.135672 | 2.179094  |
| Li                                    | -1.840515 | -0.999335 | 0.687652  |
| C                                     | -3.827787 | 3.950317  | -1.131350 |
| C                                     | -2.539889 | 4.257900  | -0.739288 |
| C                                     | -3.381099 | 1.573230  | -0.870296 |
| C                                     | -4.247610 | 2.597386  | -1.198297 |
| H                                     | -4.527830 | 4.747917  | -1.392246 |
| H                                     | -2.204781 | 5.297313  | -0.685565 |
| H                                     | -3.697918 | 0.530733  | -0.908218 |
| H                                     | -5.268561 | 2.364308  | -1.512276 |
| H                                     | 5.658759  | 0.192862  | -2.158343 |
| C                                     | 5.996953  | 0.250881  | 0.561581  |
| F                                     | 6.055161  | -0.648085 | 1.565596  |
| F                                     | 7.084681  | 0.055692  | -0.207639 |
| F                                     | 6.138838  | 1.467345  | 1.134363  |
| C                                     | -4.526362 | -0.288306 | 1.829616  |
| O                                     | -3.736251 | -1.125262 | 0.974539  |
| C                                     | -4.621087 | -2.096573 | 0.408556  |
| C                                     | -5.882981 | -1.299615 | 0.070895  |
| C                                     | -5.913839 | -0.195777 | 1.158778  |
| H                                     | -4.591155 | -0.752091 | 2.830418  |
| H                                     | -4.011024 | 0.678180  | 1.924648  |
| H                                     | -4.115184 | -2.549316 | -0.454941 |
| H                                     | -4.829938 | -2.887559 | 1.154745  |
| H                                     | -5.786968 | -0.854793 | -0.931751 |
| H                                     | -6.782820 | -1.931850 | 0.073678  |

|                                          |           |           |           |
|------------------------------------------|-----------|-----------|-----------|
| H                                        | -6.075098 | 0.796573  | 0.713692  |
| H                                        | -6.712862 | -0.365229 | 1.895301  |
| C                                        | -1.072978 | -2.196901 | -1.961597 |
| O                                        | -1.506647 | -2.412039 | -0.605959 |
| C                                        | -0.982070 | -3.662681 | -0.101159 |
| C                                        | -0.258358 | -4.315185 | -1.281091 |
| C                                        | 0.140375  | -3.102949 | -2.132852 |
| H                                        | -1.887277 | -2.477373 | -2.655487 |
| H                                        | -0.862637 | -1.124175 | -2.086811 |
| H                                        | -0.301327 | -3.433003 | 0.735463  |
| H                                        | -1.817593 | -4.267254 | 0.287129  |
| H                                        | 0.598601  | -4.923546 | -0.957052 |
| H                                        | -0.947146 | -4.965713 | -1.844754 |
| H                                        | 1.038168  | -2.616908 | -1.717216 |
| H                                        | 0.338430  | -3.350501 | -3.186137 |
| 36                                       |           |           |           |
| TS_B8 SCF Done: -1201.46884196 A.U.      |           |           |           |
| C                                        | -2.467103 | -2.047413 | 0.090184  |
| C                                        | -1.302395 | -1.360337 | 0.290545  |
| C                                        | -1.283219 | 0.079576  | 0.243876  |
| C                                        | -3.597088 | 0.080360  | -0.233602 |
| C                                        | -3.678729 | -1.345796 | -0.183504 |
| H                                        | -2.475692 | -3.140951 | 0.112647  |
| H                                        | -0.374829 | -1.904574 | 0.457998  |
| C                                        | -0.033644 | 0.822916  | 0.440821  |
| H                                        | -0.536120 | 1.826632  | 1.415580  |
| C                                        | 1.249955  | 0.108466  | 0.681145  |
| C                                        | 2.360478  | 0.271331  | -0.168276 |
| C                                        | 1.411148  | -0.711404 | 1.818617  |
| C                                        | 3.567673  | -0.380534 | 0.101418  |
| H                                        | 2.277693  | 0.917454  | -1.042508 |
| C                                        | 2.614992  | -1.368018 | 2.077154  |
| H                                        | 0.577108  | -0.823466 | 2.516007  |
| C                                        | 3.707320  | -1.209942 | 1.219903  |
| H                                        | 2.709056  | -1.996309 | 2.966598  |
| N                                        | -2.427305 | 0.756918  | 0.007370  |
| N                                        | -0.335889 | 3.042710  | -0.013971 |
| N                                        | 0.140340  | 1.981706  | -0.443546 |
| O                                        | -0.947489 | 2.910880  | 1.232832  |
| Li                                       | -2.692109 | 2.602664  | 0.656918  |
| C                                        | -6.056508 | -1.255166 | -0.694484 |
| C                                        | -4.917943 | -1.991274 | -0.415053 |
| C                                        | -4.779200 | 0.809052  | -0.538762 |
| C                                        | -5.979657 | 0.155107  | -0.758627 |
| H                                        | -7.009999 | -1.758002 | -0.873117 |
| H                                        | -4.956636 | -3.083404 | -0.370956 |
| H                                        | -4.734183 | 1.900143  | -0.622598 |
| H                                        | -6.875458 | 0.735946  | -0.993871 |
| H                                        | 4.656217  | -1.708770 | 1.424519  |
| C                                        | 4.711649  | -0.231707 | -0.865079 |
| F                                        | 5.909209  | -0.407332 | -0.271745 |
| F                                        | 4.733652  | 0.981365  | -1.451152 |
| F                                        | 4.645215  | -1.138517 | -1.867140 |
| 62                                       |           |           |           |
| TS_B8-THF2 SCF Done: -1666.64446579 A.U. |           |           |           |
| C                                        | 2.042342  | -3.646843 | 0.289012  |

|    |           |           |           |
|----|-----------|-----------|-----------|
| C  | 0.860451  | -3.082710 | 0.694534  |
| C  | 0.730161  | -1.654590 | 0.755908  |
| C  | 2.943274  | -1.399070 | 0.023006  |
| C  | 3.142529  | -2.813757 | -0.070587 |
| H  | 2.159583  | -4.733708 | 0.251590  |
| H  | 0.019193  | -3.704676 | 1.004751  |
| C  | -0.517700 | -1.030384 | 1.228352  |
| H  | -0.960537 | -1.190305 | 2.633533  |
| C  | -1.773414 | -1.223351 | 0.469470  |
| C  | -2.900083 | -0.417186 | 0.759466  |
| C  | -1.919236 | -2.152281 | -0.591039 |
| C  | -4.083086 | -0.532263 | 0.028306  |
| H  | -2.850850 | 0.323734  | 1.556838  |
| C  | -3.115848 | -2.279019 | -1.297265 |
| H  | -1.076213 | -2.776842 | -0.887713 |
| C  | -4.215700 | -1.467830 | -1.004541 |
| H  | -3.182704 | -3.010482 | -2.107259 |
| N  | 1.754429  | -0.861348 | 0.424685  |
| N  | -0.649053 | 0.625402  | 2.811459  |
| N  | -0.282603 | 0.375125  | 1.630039  |
| O  | -1.195298 | -0.388516 | 3.450382  |
| Li | 1.093995  | 1.090926  | 0.381117  |
| C  | 5.420950  | -2.451118 | -0.846098 |
| C  | 4.396258  | -3.315660 | -0.504875 |
| C  | 4.012906  | -0.533788 | -0.336414 |
| C  | 5.222014  | -1.050948 | -0.763077 |
| H  | 6.383877  | -2.844024 | -1.181847 |
| H  | 4.536809  | -4.398574 | -0.567195 |
| H  | 3.850136  | 0.542769  | -0.271176 |
| H  | 6.034245  | -0.372598 | -1.038573 |
| H  | -5.145185 | -1.547513 | -1.569970 |
| C  | -5.179267 | 0.464153  | 0.279843  |
| F  | -4.960369 | 1.615514  | -0.405284 |
| F  | -5.279985 | 0.812540  | 1.577664  |
| F  | -6.389470 | 0.016421  | -0.106144 |
| C  | 3.347013  | 2.580374  | 1.689560  |
| O  | 2.356894  | 2.484321  | 0.653470  |
| C  | 2.651042  | 3.511730  | -0.301765 |
| C  | 4.175201  | 3.480502  | -0.423933 |
| C  | 4.642384  | 3.043752  | 0.988355  |
| H  | 3.009829  | 3.315299  | 2.442183  |
| H  | 3.424518  | 1.595219  | 2.171820  |
| H  | 2.108769  | 3.273819  | -1.227425 |
| H  | 2.293646  | 4.485982  | 0.082890  |
| H  | 4.473615  | 2.737592  | -1.179650 |
| H  | 4.583764  | 4.454729  | -0.729199 |
| H  | 5.378630  | 2.229073  | 0.929788  |
| H  | 5.106783  | 3.872385  | 1.542430  |
| C  | 0.247364  | 0.474664  | -2.387305 |
| O  | 0.189062  | 1.408683  | -1.287716 |
| C  | -1.063128 | 2.132491  | -1.306927 |
| C  | -1.926356 | 1.424269  | -2.346886 |
| C  | -0.874915 | 0.896352  | -3.330734 |
| H  | 1.252569  | 0.524778  | -2.834305 |
| H  | 0.084753  | -0.545946 | -2.000875 |
| H  | -1.496723 | 2.113698  | -0.295417 |
| H  | -0.858024 | 3.181294  | -1.586713 |
| H  | -2.466792 | 0.587176  | -1.881770 |



|                                       |           |           |           |
|---------------------------------------|-----------|-----------|-----------|
| H                                     | -2.665230 | 2.097826  | -2.804896 |
| H                                     | -1.235357 | 0.059927  | -3.947581 |
| H                                     | -0.532254 | 1.701222  | -4.002292 |
| 26                                    |           |           |           |
| B9 SCF Done: -726.655889609 A.U.      |           |           |           |
| C                                     | -1.823843 | -2.278785 | -1.075357 |
| C                                     | -0.835149 | -1.311500 | -0.911459 |
| C                                     | -1.030082 | -0.276065 | 0.015365  |
| C                                     | -3.120023 | -1.123582 | 0.572199  |
| C                                     | -2.991540 | -2.192814 | -0.310636 |
| H                                     | -1.685365 | -3.093812 | -1.790418 |
| H                                     | 0.089853  | -1.353678 | -1.488609 |
| H                                     | -4.025302 | -1.007981 | 1.177234  |
| H                                     | -3.790066 | -2.931988 | -0.399794 |
| C                                     | 0.017164  | 0.815892  | 0.198842  |
| H                                     | -0.126819 | 1.246265  | 1.205486  |
| C                                     | 1.428436  | 0.244542  | 0.165954  |
| C                                     | 2.384032  | 0.633474  | -0.781249 |
| C                                     | 3.655262  | 0.055381  | -0.727864 |
| H                                     | 2.117871  | 1.372775  | -1.535900 |
| C                                     | 2.908214  | -1.209255 | 1.165436  |
| C                                     | 3.929257  | -0.887872 | 0.264044  |
| H                                     | 4.420980  | 0.338990  | -1.455063 |
| H                                     | 3.086847  | -1.944462 | 1.959497  |
| N                                     | -2.170956 | -0.184944 | 0.728930  |
| N                                     | -0.971490 | 2.789928  | -0.639527 |
| N                                     | -0.145388 | 1.855868  | -0.840939 |
| O                                     | -1.681350 | 2.804701  | 0.448562  |
| Li                                    | -2.501618 | 1.629348  | 1.452308  |
| H                                     | 4.908417  | -1.365701 | 0.343903  |
| N                                     | 1.691958  | -0.661216 | 1.121051  |
| 2                                     |           |           |           |
| B9-THF2 SCF Done: -1191.81991469 A.U. |           |           |           |
| C                                     | 1.741751  | 3.651714  | -1.116691 |
| C                                     | 2.053805  | 2.542570  | -0.332825 |
| C                                     | 1.086831  | 1.543493  | -0.141096 |
| C                                     | -0.437307 | 2.712156  | -1.439232 |
| C                                     | 0.469219  | 3.741372  | -1.689909 |
| H                                     | 2.482603  | 4.438873  | -1.279826 |
| H                                     | 3.037867  | 2.440892  | 0.128327  |
| H                                     | -1.449733 | 2.745851  | -1.855671 |
| H                                     | 0.181517  | 4.590590  | -2.313164 |
| C                                     | 1.363493  | 0.339609  | 0.748975  |
| H                                     | 0.643753  | -0.443303 | 0.471252  |
| C                                     | 2.749101  | -0.234123 | 0.505021  |
| C                                     | 3.770986  | -0.189990 | 1.462245  |
| C                                     | 5.013666  | -0.744775 | 1.145999  |
| H                                     | 3.572246  | 0.272143  | 2.428796  |
| C                                     | 4.115020  | -1.323926 | -0.998700 |
| C                                     | 5.196036  | -1.325570 | -0.110714 |
| H                                     | 5.829482  | -0.722761 | 1.873818  |
| H                                     | 4.217969  | -1.773853 | -1.993407 |
| H                                     | 6.149536  | -1.772774 | -0.401060 |
| N                                     | -0.140333 | 1.643839  | -0.685463 |
| N                                     | 0.023217  | 0.649256  | 2.659549  |
| N                                     | 1.189065  | 0.721982  | 2.168101  |

|    |           |           |           |
|----|-----------|-----------|-----------|
| O  | -0.972540 | 0.280864  | 1.919590  |
| Li | -1.486430 | 0.349448  | 0.133133  |
| C  | -1.309835 | -2.534618 | 0.171538  |
| O  | -1.270642 | -1.399236 | -0.716827 |
| C  | -0.442510 | -1.686658 | -1.868064 |
| C  | -0.040475 | -3.156802 | -1.732597 |
| C  | -0.096500 | -3.372570 | -0.214317 |
| H  | -1.287067 | -2.154211 | 1.203800  |
| H  | -2.253088 | -3.089895 | 0.012058  |
| H  | -1.018588 | -1.471504 | -2.782387 |
| H  | 0.440525  | -1.028362 | -1.837988 |
| H  | -0.771000 | -3.809795 | -2.238090 |
| H  | 0.952731  | -3.351546 | -2.163165 |
| H  | -0.201432 | -4.428234 | 0.076543  |
| H  | 0.811119  | -2.968243 | 0.262855  |
| C  | -4.087648 | 0.723453  | 1.287439  |
| O  | -3.380930 | 0.712975  | 0.029267  |
| C  | -4.190295 | 0.076745  | -0.985743 |
| C  | -5.476232 | -0.377441 | -0.281904 |
| C  | -5.044701 | -0.456498 | 1.189037  |
| H  | -3.336299 | 0.643164  | 2.085915  |
| H  | -4.636148 | 1.678469  | 1.394972  |
| H  | -4.379584 | 0.793961  | -1.801861 |
| H  | -3.613322 | -0.770660 | -1.390015 |
| H  | -6.269735 | 0.378057  | -0.401826 |
| H  | -5.852954 | -1.330991 | -0.680550 |
| H  | -5.884358 | -0.385687 | 1.896333  |
| H  | -4.501463 | -1.396238 | 1.385986  |
| N  | 2.925362  | -0.794784 | -0.703341 |

26

TS\_B9 SCF Done: -726.606826343 A.U.

|    |           |           |           |
|----|-----------|-----------|-----------|
| C  | -1.146356 | -0.266256 | -0.056756 |
| C  | -1.116311 | -1.680774 | -0.171294 |
| C  | -2.297818 | -2.401177 | -0.251265 |
| C  | -3.530033 | -1.729738 | -0.212777 |
| C  | -3.493776 | -0.349290 | -0.081921 |
| N  | -2.356321 | 0.367101  | 0.005167  |
| H  | -2.262537 | -3.489062 | -0.357845 |
| H  | -0.154682 | -2.186457 | -0.194152 |
| H  | -4.482023 | -2.259274 | -0.279720 |
| H  | -4.428071 | 0.223209  | -0.035438 |
| C  | 0.073709  | 0.567826  | -0.021879 |
| H  | -0.300239 | 1.498378  | 1.093098  |
| Li | -2.602167 | 2.163579  | 0.770961  |
| N  | -0.021355 | 1.779704  | -0.856952 |
| N  | -0.470953 | 2.779924  | -0.278286 |
| O  | -0.797760 | 2.552028  | 1.059669  |
| C  | 1.438837  | 0.006405  | -0.024441 |
| C  | 2.515108  | 0.715090  | -0.619281 |
| C  | 2.909833  | -1.634828 | 0.699716  |
| C  | 3.803998  | 0.200440  | -0.538508 |
| H  | 2.326382  | 1.656959  | -1.135085 |
| C  | 4.022586  | -1.006165 | 0.138446  |
| H  | 3.031161  | -2.581756 | 1.241410  |
| H  | 4.636831  | 0.738448  | -1.000496 |
| N  | 1.666328  | -1.154377 | 0.628073  |
| H  | 5.019206  | -1.443074 | 0.231738  |

52

TS\_B9-THF2 SCF Done: -1191.77891852 A.U.

|    |           |           |           |
|----|-----------|-----------|-----------|
| C  | 0.907142  | 1.914006  | 0.199596  |
| C  | 1.817648  | 2.995263  | 0.145117  |
| C  | 1.499980  | 4.132087  | -0.588387 |
| C  | 0.266453  | 4.200823  | -1.252278 |
| C  | -0.589138 | 3.108426  | -1.137769 |
| N  | -0.283988 | 1.999776  | -0.448443 |
| H  | 2.199576  | 4.971666  | -0.629388 |
| H  | 2.753272  | 2.937259  | 0.703900  |
| H  | -0.026570 | 5.079040  | -1.830895 |
| H  | -1.568611 | 3.116461  | -1.629685 |
| C  | 1.181874  | 0.690504  | 0.979283  |
| H  | 1.263194  | 0.749040  | 2.431808  |
| Li | -1.299616 | 0.225498  | -0.305841 |
| N  | -0.058007 | -0.074921 | 1.227424  |
| N  | -0.266268 | -0.292113 | 2.454918  |
| O  | 0.645716  | 0.174377  | 3.268070  |
| C  | 2.348858  | -0.158308 | 0.668379  |
| C  | 3.392434  | 0.221272  | -0.217012 |
| C  | 4.461883  | -0.640514 | -0.431497 |
| H  | 3.353660  | 1.173619  | -0.745176 |
| C  | 3.417332  | -2.184018 | 1.058180  |
| C  | 4.494233  | -1.879445 | 0.223058  |
| H  | 5.263506  | -0.352616 | -1.118105 |
| H  | 3.386049  | -3.151045 | 1.577387  |
| H  | 5.315160  | -2.586021 | 0.083533  |
| C  | -4.193528 | -0.248811 | -0.882757 |
| O  | -3.148347 | 0.017970  | 0.077446  |
| C  | -3.660140 | -0.085453 | 1.425695  |
| C  | -4.964613 | -0.859805 | 1.286168  |
| C  | -5.481682 | -0.352824 | -0.066229 |
| H  | -4.210125 | 0.561996  | -1.628560 |
| H  | -3.961931 | -1.194650 | -1.403038 |
| H  | -2.898882 | -0.577246 | 2.048306  |
| H  | -3.834065 | 0.931081  | 1.823622  |
| H  | -4.761693 | -1.942882 | 1.241030  |
| H  | -5.656669 | -0.671802 | 2.120073  |
| H  | -6.219374 | -1.020283 | -0.535248 |
| H  | -5.943367 | 0.641328  | 0.051964  |
| C  | -1.178398 | -2.379547 | -1.378839 |
| O  | -0.886927 | -1.016219 | -1.726418 |
| C  | 0.410074  | -0.967238 | -2.360471 |
| C  | 1.108449  | -2.305571 | -2.042588 |
| C  | 0.176871  | -2.970113 | -1.013183 |
| H  | -1.905804 | -2.370061 | -0.553644 |
| H  | -1.632754 | -2.897565 | -2.245595 |
| H  | 0.276855  | -0.815754 | -3.445608 |
| H  | 0.946816  | -0.097597 | -1.954222 |
| H  | 1.186865  | -2.922206 | -2.951569 |
| H  | 2.122591  | -2.152664 | -1.647148 |
| H  | 0.189412  | -4.069006 | -1.064552 |
| H  | 0.450623  | -2.659833 | 0.006164  |
| N  | 2.384431  | -1.368481 | 1.276469  |

34

B10 SCF Done: -881.563657173 A.U.

|    |           |           |           |
|----|-----------|-----------|-----------|
| C  | 2.530682  | -2.398254 | 1.270762  |
| C  | 1.708330  | -1.313693 | 0.973983  |
| C  | 2.112870  | -0.383957 | 0.003246  |
| C  | 4.084217  | -1.567018 | -0.348195 |
| C  | 3.744395  | -2.538194 | 0.590156  |
| H  | 2.226676  | -3.130712 | 2.023022  |
| H  | 0.750149  | -1.182184 | 1.478208  |
| H  | 5.031102  | -1.629395 | -0.894943 |
| H  | 4.416939  | -3.376143 | 0.783729  |
| C  | 1.254771  | 0.833533  | -0.330408 |
| H  | 1.522949  | 1.147502  | -1.353703 |
| N  | 3.297711  | -0.514823 | -0.632040 |
| N  | 2.523222  | 2.703642  | 0.379275  |
| N  | 1.564138  | 1.923180  | 0.629895  |
| O  | 3.247716  | 2.528171  | -0.688614 |
| Li | 3.944494  | 1.145728  | -1.496127 |
| C  | -2.936779 | -0.194331 | -0.383709 |
| C  | -2.435042 | 0.584151  | 0.702039  |
| C  | -1.069312 | 0.932808  | 0.725497  |
| C  | -0.234483 | 0.513241  | -0.309448 |
| C  | -0.763734 | -0.258196 | -1.377485 |
| C  | -2.105930 | -0.621056 | -1.431446 |
| C  | -4.645673 | 0.228678  | 0.997960  |
| C  | -3.551344 | 0.839209  | 1.570676  |
| H  | -0.656282 | 1.532478  | 1.537295  |
| H  | -0.093220 | -0.575814 | -2.181691 |
| H  | -2.497764 | -1.211204 | -2.262926 |
| H  | -5.679417 | 0.185629  | 1.339428  |
| H  | -3.544692 | 1.404451  | 2.501120  |
| N  | -4.284884 | -0.395901 | -0.178770 |
| C  | -5.160514 | -1.133093 | -1.065153 |
| H  | -5.187317 | -0.670526 | -2.065550 |
| H  | -4.822165 | -2.176722 | -1.173320 |
| H  | -6.178212 | -1.135561 | -0.652746 |

60

B10-THF2 SCF Done: -1346.72711643 A.U.

|    |           |           |           |
|----|-----------|-----------|-----------|
| C  | -0.183943 | -3.729829 | -1.543745 |
| C  | -0.705417 | -2.775310 | -0.672945 |
| C  | 0.058751  | -1.639414 | -0.360516 |
| C  | 1.788660  | -2.382884 | -1.715756 |
| C  | 1.090992  | -3.531795 | -2.085099 |
| H  | -0.764835 | -4.619975 | -1.799681 |
| H  | -1.698184 | -2.893840 | -0.235706 |
| H  | 2.796002  | -2.191823 | -2.101016 |
| H  | 1.537987  | -4.251877 | -2.773679 |
| C  | -0.444404 | -0.595523 | 0.628453  |
| H  | 0.145711  | 0.316410  | 0.454041  |
| N  | 1.290202  | -1.462530 | -0.877194 |
| N  | 0.916652  | -0.895859 | 2.539087  |
| N  | -0.213436 | -1.097803 | 2.006086  |
| O  | 1.852606  | -0.288178 | 1.880180  |
| Li | 2.415977  | -0.088299 | 0.132699  |
| C  | -4.571667 | 0.420278  | -0.126564 |
| C  | -4.252226 | -0.324414 | 1.048038  |
| C  | -2.906878 | -0.658099 | 1.307187  |
| C  | -1.913612 | -0.255836 | 0.415925  |
| C  | -2.263091 | 0.488518  | -0.742585 |

|                                      |           |           |           |
|--------------------------------------|-----------|-----------|-----------|
| C                                    | -3.580128 | 0.833855  | -1.029929 |
| C                                    | -6.483186 | 0.020706  | 0.966851  |
| C                                    | -5.495351 | -0.565384 | 1.728013  |
| H                                    | -2.626488 | -1.220548 | 2.198317  |
| H                                    | -1.470219 | 0.796966  | -1.429510 |
| H                                    | -3.829981 | 1.409209  | -1.924203 |
| H                                    | -7.559074 | 0.064449  | 1.133285  |
| H                                    | -5.639484 | -1.104551 | 2.662818  |
| N                                    | -5.936196 | 0.615952  | -0.151720 |
| C                                    | -6.655712 | 1.331223  | -1.184098 |
| H                                    | -6.324978 | 2.381532  | -1.240029 |
| H                                    | -6.496498 | 0.863201  | -2.169451 |
| H                                    | -7.729977 | 1.313197  | -0.957689 |
| C                                    | 5.130023  | 0.565651  | -0.819293 |
| O                                    | 4.326092  | -0.314276 | -0.002852 |
| C                                    | 5.018730  | -0.629942 | 1.224789  |
| C                                    | 6.044536  | 0.484844  | 1.384629  |
| C                                    | 6.455887  | 0.735063  | -0.072238 |
| H                                    | 5.250412  | 0.118238  | -1.819768 |
| H                                    | 4.588504  | 1.520362  | -0.927387 |
| H                                    | 4.266170  | -0.678694 | 2.025265  |
| H                                    | 5.508274  | -1.616650 | 1.123866  |
| H                                    | 5.564404  | 1.381669  | 1.811016  |
| H                                    | 6.884332  | 0.198827  | 2.035107  |
| H                                    | 6.904483  | 1.725434  | -0.239771 |
| H                                    | 7.182000  | -0.028330 | -0.396883 |
| C                                    | 1.359955  | 2.009524  | -1.735555 |
| O                                    | 2.042712  | 1.721921  | -0.497175 |
| C                                    | 1.714222  | 2.712380  | 0.497419  |
| C                                    | 0.374511  | 3.280078  | 0.046169  |
| C                                    | 0.532039  | 3.275789  | -1.481050 |
| H                                    | 2.105100  | 2.138316  | -2.537990 |
| H                                    | 0.731884  | 1.139359  | -1.988078 |
| H                                    | 1.688536  | 2.205571  | 1.473125  |
| H                                    | 2.499912  | 3.490991  | 0.512859  |
| H                                    | -0.444874 | 2.610318  | 0.353258  |
| H                                    | 0.177071  | 4.279509  | 0.460869  |
| H                                    | -0.428856 | 3.256823  | -2.016092 |
| H                                    | 1.086736  | 4.169882  | -1.808620 |
| 34                                   |           |           |           |
| TS_B10 SCF Done: -881.511663401 A.U. |           |           |           |
| C                                    | 2.183182  | 0.348821  | -0.068736 |
| C                                    | 1.763863  | 1.704686  | -0.204143 |
| C                                    | 2.690879  | 2.707390  | -0.425634 |
| C                                    | 4.057691  | 2.387242  | -0.520410 |
| C                                    | 4.404408  | 1.052774  | -0.377604 |
| N                                    | 3.520009  | 0.060615  | -0.150818 |
| H                                    | 2.354625  | 3.741522  | -0.543229 |
| H                                    | 0.702830  | 1.944950  | -0.155454 |
| H                                    | 4.820059  | 3.146516  | -0.702696 |
| H                                    | 5.457127  | 0.750375  | -0.440494 |
| C                                    | 1.217943  | -0.732229 | 0.159009  |
| H                                    | 1.965274  | -1.410634 | 1.301400  |
| Li                                   | 4.297308  | -1.571409 | 0.600957  |
| N                                    | 1.492131  | -1.980525 | -0.547712 |
| N                                    | 2.258791  | -2.769283 | 0.027306  |
| O                                    | 2.717908  | -2.287113 | 1.266427  |

|   |           |           |           |
|---|-----------|-----------|-----------|
| C | -2.975873 | 0.228297  | 0.306517  |
| C | -2.475864 | -0.520254 | -0.800469 |
| C | -1.102433 | -0.827675 | -0.860151 |
| C | -0.245461 | -0.409610 | 0.165276  |
| C | -0.785852 | 0.316789  | 1.264199  |
| C | -2.134262 | 0.651994  | 1.346062  |
| C | -4.700662 | -0.211637 | -1.050536 |
| C | -3.603095 | -0.787543 | -1.652703 |
| H | -0.704169 | -1.397527 | -1.702121 |
| H | -0.111606 | 0.618761  | 2.070255  |
| H | -2.523155 | 1.213261  | 2.198852  |
| H | -5.741066 | -0.186912 | -1.373252 |
| H | -3.600887 | -1.335828 | -2.593366 |
| N | -4.333120 | 0.402037  | 0.129335  |
| C | -5.208738 | 1.102882  | 1.043938  |
| H | -5.215354 | 0.617301  | 2.033919  |
| H | -4.886158 | 2.149277  | 1.172702  |
| H | -6.231745 | 1.098601  | 0.644724  |

60

TS\_B10-THF2 SCF Done: -1346.68081850 A.U.

|    |           |           |           |
|----|-----------|-----------|-----------|
| C  | 0.182320  | 1.567584  | -0.852752 |
| C  | 1.102462  | 2.505217  | -1.400154 |
| C  | 0.655224  | 3.495088  | -2.259850 |
| C  | -0.708708 | 3.562831  | -2.598011 |
| C  | -1.548017 | 2.601029  | -2.047571 |
| N  | -1.133602 | 1.636919  | -1.211161 |
| H  | 1.364250  | 4.217073  | -2.675562 |
| H  | 2.158070  | 2.439440  | -1.135425 |
| H  | -1.100318 | 4.329356  | -3.269429 |
| H  | -2.617637 | 2.596926  | -2.290691 |
| C  | 0.571021  | 0.540393  | 0.107083  |
| H  | 0.482487  | 0.588262  | 1.580199  |
| Li | -2.223905 | 0.071474  | -0.561245 |
| N  | -0.432124 | -0.513177 | 0.229787  |
| N  | -0.600219 | -0.906635 | 1.426366  |
| O  | 0.134354  | -0.265198 | 2.317261  |
| C  | 4.621520  | -0.940159 | -0.071560 |
| C  | 4.348166  | 0.252048  | 0.663878  |
| C  | 3.020902  | 0.718186  | 0.738145  |
| C  | 1.996443  | 0.034087  | 0.075816  |
| C  | 2.308912  | -1.150829 | -0.647085 |
| C  | 3.605300  | -1.652535 | -0.725981 |
| C  | 6.558273  | -0.203883 | 0.776537  |
| C  | 5.606823  | 0.699984  | 1.196271  |
| H  | 2.786319  | 1.616541  | 1.316474  |
| H  | 1.499047  | -1.679655 | -1.155507 |
| H  | 3.823264  | -2.565361 | -1.285483 |
| H  | 7.631545  | -0.224662 | 0.963314  |
| H  | 5.785227  | 1.579937  | 1.812155  |
| N  | 5.974527  | -1.194441 | 0.013361  |
| C  | 6.649226  | -2.317605 | -0.601360 |
| H  | 6.252970  | -3.272564 | -0.218380 |
| H  | 6.520712  | -2.302344 | -1.696240 |
| H  | 7.722305  | -2.266762 | -0.373628 |
| C  | -2.954300 | 1.891803  | 1.582429  |
| O  | -3.313175 | 0.650419  | 0.933491  |
| C  | -3.742334 | -0.319331 | 1.914447  |

|   |           |           |           |
|---|-----------|-----------|-----------|
| C | -3.325763 | 0.261247  | 3.262381  |
| C | -3.474289 | 1.766781  | 3.011532  |
| H | -1.856572 | 2.001988  | 1.562249  |
| H | -3.398123 | 2.725453  | 1.016449  |
| H | -4.838589 | -0.440286 | 1.841371  |
| H | -3.259995 | -1.282282 | 1.692619  |
| H | -3.944180 | -0.112999 | 4.091556  |
| H | -2.271406 | 0.014038  | 3.463292  |
| H | -4.534608 | 2.065517  | 3.065572  |
| H | -2.903998 | 2.388614  | 3.717330  |
| C | -2.898987 | -2.668815 | -1.216430 |
| O | -3.251644 | -1.283913 | -1.423824 |
| C | -4.681670 | -1.151490 | -1.595256 |
| C | -5.240543 | -2.576747 | -1.561880 |
| C | -4.186356 | -3.325952 | -0.736299 |
| H | -2.554525 | -3.104304 | -2.172475 |
| H | -2.069737 | -2.707320 | -0.494927 |
| H | -5.070006 | -0.532512 | -0.768821 |
| H | -4.882398 | -0.629511 | -2.544874 |
| H | -6.249694 | -2.616861 | -1.126337 |
| H | -5.290978 | -2.994092 | -2.580768 |
| H | -4.329550 | -3.135294 | 0.340111  |
| H | -4.192266 | -4.413484 | -0.900274 |

20

A0' SCF Done: -515.126785437 A.U.

|   |           |           |           |
|---|-----------|-----------|-----------|
| C | -0.718609 | 0.069981  | 0.612893  |
| C | -1.116393 | -1.141033 | 0.021308  |
| C | -2.332898 | -1.192361 | -0.657909 |
| C | -3.115667 | -0.035787 | -0.723624 |
| C | -2.636182 | 1.119864  | -0.102403 |
| N | -1.468018 | 1.177204  | 0.548308  |
| H | -2.666508 | -2.121181 | -1.128169 |
| H | -0.472395 | -2.020185 | 0.095949  |
| H | -4.076263 | -0.026496 | -1.243664 |
| H | -3.223844 | 2.045119  | -0.132432 |
| C | 0.601092  | 0.163854  | 1.360137  |
| C | 1.756727  | -0.221670 | 0.458396  |
| O | 2.230836  | -1.332130 | 0.378858  |
| H | 0.724888  | 1.193241  | 1.719598  |
| O | 2.163108  | 0.813643  | -0.288504 |
| C | 3.201991  | 0.550344  | -1.240194 |
| H | 2.882047  | -0.212346 | -1.967345 |
| H | 3.396264  | 1.500971  | -1.753139 |
| H | 4.116310  | 0.199290  | -0.737039 |
| H | 0.603711  | -0.530096 | 2.213626  |

35

TS\_A0A' SCF Done: -1347.96250032 A.U.

|   |           |           |           |
|---|-----------|-----------|-----------|
| C | -1.638880 | 0.344429  | -0.288489 |
| C | -2.303799 | 1.248109  | 0.569577  |
| C | -3.499645 | 0.874751  | 1.177286  |
| C | -4.030968 | -0.395818 | 0.932460  |
| C | -3.312745 | -1.235827 | 0.082110  |
| N | -2.158026 | -0.892646 | -0.502802 |
| H | -4.018488 | 1.576608  | 1.836555  |
| H | -1.875585 | 2.232452  | 0.744579  |
| H | -4.967504 | -0.728185 | 1.385101  |

|   |           |           |           |
|---|-----------|-----------|-----------|
| H | -3.686827 | -2.244464 | -0.134775 |
| C | -0.354400 | 0.602789  | -0.989210 |
| C | 0.343918  | 1.897550  | -1.022073 |
| O | 1.073790  | 2.262243  | -1.927417 |
| H | 0.491282  | -0.207637 | -0.455942 |
| O | 0.220025  | 2.635077  | 0.115937  |
| C | 0.995379  | 3.831015  | 0.186999  |
| H | 0.758154  | 4.511928  | -0.645403 |
| H | 0.739959  | 4.306619  | 1.143578  |
| H | 2.073659  | 3.607228  | 0.159453  |
| H | -0.387340 | 0.211356  | -2.016175 |
| C | 2.420163  | -0.838444 | 0.685121  |
| C | 3.372665  | -0.112679 | -0.289961 |
| H | 3.658869  | -0.794743 | -1.108485 |
| H | 2.871839  | 0.756404  | -0.745123 |
| H | 4.295502  | 0.238753  | 0.203813  |
| C | 3.133890  | -2.076895 | 1.260696  |
| H | 2.464005  | -2.609507 | 1.956800  |
| H | 3.402785  | -2.771816 | 0.446914  |
| H | 4.057561  | -1.815249 | 1.805968  |
| C | 2.044749  | 0.111831  | 1.843235  |
| H | 1.537030  | 1.008960  | 1.456576  |
| H | 1.346346  | -0.396686 | 2.528800  |
| H | 2.925913  | 0.436915  | 2.423232  |
| O | 1.270357  | -1.255924 | 0.012650  |
| K | -0.216648 | -2.931918 | -0.945354 |

20

A' SCF Done: -1114.42553521 A.U.

|   |           |           |           |
|---|-----------|-----------|-----------|
| C | -1.170604 | -0.169892 | 0.299225  |
| C | -1.746121 | 0.989341  | -0.304478 |
| C | -3.101079 | 1.011571  | -0.606043 |
| C | -3.901800 | -0.103144 | -0.313094 |
| C | -3.265668 | -1.196391 | 0.281735  |
| N | -1.967823 | -1.244940 | 0.578001  |
| H | -3.539239 | 1.901689  | -1.068909 |
| H | -1.112332 | 1.847240  | -0.519617 |
| H | -4.971511 | -0.123951 | -0.532985 |
| H | -3.851005 | -2.092241 | 0.533170  |
| C | 0.218826  | -0.328196 | 0.643967  |
| C | 1.318602  | 0.545212  | 0.502551  |
| O | 2.512494  | 0.233220  | 0.740629  |
| H | 0.436170  | -1.259535 | 1.177564  |
| K | 2.518509  | -1.944008 | -0.572920 |
| O | 1.050497  | 1.803888  | 0.032826  |
| C | 2.165501  | 2.652839  | -0.195568 |
| H | 2.845286  | 2.242569  | -0.962144 |
| H | 1.756527  | 3.610264  | -0.549208 |
| H | 2.749315  | 2.819806  | 0.724188  |

23

TS\_AB' SCF Done: -1298.94258148 A.U.

|   |           |           |           |
|---|-----------|-----------|-----------|
| C | -1.612321 | -0.182259 | -0.303212 |
| C | -2.448822 | 0.772183  | 0.329801  |
| C | -3.824445 | 0.566933  | 0.355227  |
| C | -4.362253 | -0.583308 | -0.234969 |
| C | -3.466002 | -1.480677 | -0.823003 |
| N | -2.146152 | -1.298763 | -0.861480 |



|   |           |           |           |
|---|-----------|-----------|-----------|
| H | -4.476756 | 1.299129  | 0.840466  |
| H | -2.007624 | 1.652927  | 0.791554  |
| H | -5.436141 | -0.783322 | -0.235320 |
| H | -3.842888 | -2.400202 | -1.290269 |
| C | -0.158550 | -0.106786 | -0.361630 |
| C | 0.681506  | 1.058775  | -0.302044 |
| O | 1.885759  | 1.065842  | -0.611655 |
| K | 3.683324  | -0.737314 | -0.707076 |
| H | 0.292048  | -0.929806 | -0.920541 |
| N | 0.278409  | -0.842091 | 1.642200  |
| N | 1.204159  | -1.561431 | 1.603188  |
| O | 2.050860  | -2.026656 | 0.817682  |
| O | 0.100866  | 2.188452  | 0.159893  |
| C | 0.930298  | 3.341702  | 0.284104  |
| H | 1.753123  | 3.167001  | 0.996131  |
| H | 1.361953  | 3.633376  | -0.686358 |
| H | 0.281883  | 4.145368  | 0.658438  |

23

B' SCF Done: -1298.97048645 A.U.

|   |           |           |           |
|---|-----------|-----------|-----------|
| C | -1.617729 | -0.462302 | -0.065012 |
| C | -2.433530 | -0.017724 | 0.986362  |
| C | -3.783334 | 0.223332  | 0.731022  |
| C | -4.274044 | 0.014623  | -0.561409 |
| C | -3.381654 | -0.428203 | -1.541532 |
| N | -2.085996 | -0.660651 | -1.305092 |
| H | -4.445077 | 0.568645  | 1.530046  |
| H | -2.002287 | 0.121057  | 1.977914  |
| H | -5.324320 | 0.187983  | -0.807418 |
| H | -3.731984 | -0.605769 | -2.565493 |
| C | -0.130882 | -0.701359 | 0.136652  |
| C | 0.631318  | 0.579623  | -0.200168 |
| K | 3.564909  | -0.461194 | -1.005258 |
| H | 0.201108  | -1.437578 | -0.613966 |
| N | 0.123383  | -1.196095 | 1.505285  |
| N | 1.339308  | -1.306703 | 1.829942  |
| O | 2.234240  | -0.941009 | 0.974631  |
| O | 1.252094  | 0.783956  | -1.233294 |
| O | 0.445677  | 1.518173  | 0.728719  |
| C | 1.102843  | 2.773622  | 0.532809  |
| H | 0.772117  | 3.423524  | 1.353000  |
| H | 2.197437  | 2.652420  | 0.578134  |
| H | 0.828850  | 3.217897  | -0.436063 |

23

TS\_BC' SCF Done: -1298.93804864 A.U.

|   |           |           |           |
|---|-----------|-----------|-----------|
| C | 1.593279  | -0.154987 | -0.054820 |
| C | 2.442324  | 0.969443  | 0.075910  |
| C | 3.821378  | 0.781075  | 0.126372  |
| C | 4.346998  | -0.512540 | 0.044144  |
| C | 3.436843  | -1.564378 | -0.083536 |
| N | 2.114189  | -1.401126 | -0.125534 |
| H | 4.484274  | 1.645679  | 0.224968  |
| H | 2.019469  | 1.968911  | 0.131393  |
| H | 5.422170  | -0.702324 | 0.079150  |
| H | 3.800147  | -2.598310 | -0.150078 |
| C | 0.112539  | -0.119031 | -0.082817 |
| C | -0.731094 | 1.064607  | -0.182542 |

|                                       |           |           |           |
|---------------------------------------|-----------|-----------|-----------|
| O                                     | -1.946743 | 1.013543  | -0.410155 |
| K                                     | -3.769402 | -0.769234 | -0.008544 |
| H                                     | -0.505609 | -0.698848 | 1.034765  |
| N                                     | -0.464479 | -1.253660 | -0.855905 |
| N                                     | -1.205122 | -1.979389 | -0.153012 |
| O                                     | -1.340420 | -1.610757 | 1.127596  |
| O                                     | -0.139839 | 2.242225  | 0.089899  |
| C                                     | -0.980547 | 3.397675  | 0.135568  |
| H                                     | -1.742962 | 3.302546  | 0.924956  |
| H                                     | -0.318646 | 4.244899  | 0.358276  |
| H                                     | -1.486624 | 3.560862  | -0.828322 |
| 23                                    |           |           |           |
| C1 SCF Done: -1298.96298824 A.U.      |           |           |           |
| C                                     | -1.513950 | -0.129979 | 0.267222  |
| C                                     | -1.930696 | 1.130969  | -0.203758 |
| C                                     | -3.234082 | 1.264283  | -0.678706 |
| C                                     | -4.086078 | 0.155764  | -0.678477 |
| C                                     | -3.578030 | -1.053492 | -0.195013 |
| N                                     | -2.334776 | -1.198546 | 0.264848  |
| H                                     | -3.580531 | 2.232341  | -1.050524 |
| H                                     | -1.243732 | 1.973276  | -0.191475 |
| H                                     | -5.113628 | 0.221842  | -1.042324 |
| H                                     | -4.210142 | -1.949708 | -0.179086 |
| C                                     | -0.152463 | -0.387804 | 0.762396  |
| C                                     | 1.031489  | 0.500465  | 0.859106  |
| O                                     | 2.151887  | 0.064785  | 1.112961  |
| K                                     | 3.006734  | -0.943724 | -1.191520 |
| H                                     | 0.455798  | 1.059629  | -1.796982 |
| N                                     | 0.155869  | -1.647130 | 0.962724  |
| N                                     | 0.478024  | -2.724253 | 1.113500  |
| O                                     | 1.233222  | 0.555370  | -1.529336 |
| O                                     | 0.702945  | 1.795536  | 0.931800  |
| C                                     | 1.756742  | 2.719562  | 0.646789  |
| H                                     | 2.065209  | 2.556507  | -0.397799 |
| H                                     | 1.333482  | 3.724021  | 0.781383  |
| H                                     | 2.609747  | 2.578206  | 1.327418  |
| 23                                    |           |           |           |
| TS-C1C2 SCF Done: -1298.96291155 A.U. |           |           |           |
| C                                     | 1.521217  | -0.134342 | -0.250681 |
| C                                     | 1.955435  | 1.123914  | 0.214051  |
| C                                     | 3.264643  | 1.246923  | 0.675236  |
| C                                     | 4.108086  | 0.131786  | 0.665246  |
| C                                     | 3.585188  | -1.072715 | 0.185197  |
| N                                     | 2.335498  | -1.209049 | -0.258970 |
| H                                     | 3.623113  | 2.212530  | 1.042152  |
| H                                     | 1.276066  | 1.972831  | 0.203878  |
| H                                     | 5.140095  | 0.189428  | 1.017725  |
| H                                     | 4.211128  | -1.973170 | 0.159849  |
| C                                     | 0.153599  | -0.376164 | -0.731078 |
| C                                     | -1.039921 | 0.519944  | -0.762633 |
| O                                     | -2.155038 | 0.088349  | -1.064054 |
| K                                     | -3.041879 | -0.966806 | 1.168137  |
| H                                     | -0.441336 | 1.013666  | 1.746296  |
| N                                     | -0.159399 | -1.624353 | -0.972623 |
| N                                     | -0.492968 | -2.693776 | -1.160588 |
| O                                     | -1.220941 | 0.534449  | 1.440238  |

|                                       |           |           |           |
|---------------------------------------|-----------|-----------|-----------|
| O                                     | -0.697530 | 1.817701  | -0.878666 |
| C                                     | -1.749292 | 2.751365  | -0.640529 |
| H                                     | -2.090261 | 2.628753  | 0.399261  |
| H                                     | -1.320727 | 3.751308  | -0.793385 |
| H                                     | -2.589940 | 2.595960  | -1.334124 |
| 23                                    |           |           |           |
| C2 SCF Done: -1298.97161220 A.U.      |           |           |           |
| C                                     | 1.563364  | -0.183753 | -0.170238 |
| C                                     | 2.058667  | 1.057342  | 0.292178  |
| C                                     | 3.392037  | 1.143013  | 0.685894  |
| C                                     | 4.209693  | 0.011027  | 0.603228  |
| C                                     | 3.634739  | -1.168405 | 0.118049  |
| N                                     | 2.359119  | -1.274341 | -0.252702 |
| H                                     | 3.792813  | 2.093915  | 1.048033  |
| H                                     | 1.402357  | 1.926439  | 0.308172  |
| H                                     | 5.260697  | 0.038041  | 0.898658  |
| H                                     | 4.243036  | -2.077364 | 0.028445  |
| C                                     | 0.167139  | -0.358119 | -0.568643 |
| C                                     | -1.067740 | 0.582586  | -0.332234 |
| O                                     | -2.161927 | 0.162385  | -0.842798 |
| K                                     | -3.238505 | -1.055567 | 1.048822  |
| H                                     | -0.403339 | 0.973170  | 1.568607  |
| N                                     | -0.190118 | -1.541790 | -0.968592 |
| N                                     | -0.597066 | -2.549319 | -1.314497 |
| O                                     | -1.225904 | 0.648574  | 1.171807  |
| O                                     | -0.617677 | 1.882279  | -0.734708 |
| C                                     | -1.631319 | 2.864676  | -0.727583 |
| H                                     | -2.035486 | 3.030078  | 0.288838  |
| H                                     | -1.178794 | 3.803045  | -1.084419 |
| H                                     | -2.468651 | 2.590499  | -1.391738 |
| 23                                    |           |           |           |
| TS-C2C3 SCF Done: -1298.96449305 A.U. |           |           |           |
| C                                     | 1.543338  | 0.134517  | -0.144925 |
| C                                     | 1.465099  | -1.262874 | 0.029813  |
| C                                     | 2.650816  | -1.996695 | 0.028554  |
| C                                     | 3.869579  | -1.326261 | -0.110956 |
| C                                     | 3.841440  | 0.068018  | -0.225947 |
| N                                     | 2.716594  | 0.785209  | -0.253533 |
| H                                     | 2.623480  | -3.081675 | 0.161728  |
| H                                     | 0.485728  | -1.709696 | 0.237069  |
| H                                     | 4.820892  | -1.862728 | -0.113065 |
| H                                     | 4.779276  | 0.630980  | -0.305925 |
| C                                     | 0.319716  | 0.951351  | -0.197451 |
| C                                     | -1.048589 | 0.547094  | -0.632598 |
| O                                     | -2.002943 | 1.314498  | -0.543398 |
| K                                     | -3.598865 | -0.857628 | -0.250038 |
| H                                     | -0.383901 | -1.071250 | -1.467981 |
| N                                     | 0.415808  | 2.203746  | 0.169295  |
| N                                     | 0.483886  | 3.289892  | 0.489333  |
| O                                     | -1.107977 | -0.435829 | -1.588855 |
| O                                     | -1.374694 | -0.912984 | 0.924958  |
| C                                     | -1.058701 | -0.388834 | 2.153588  |
| H                                     | 0.022244  | -0.497189 | 2.429455  |
| H                                     | -1.271641 | 0.709222  | 2.234243  |
| H                                     | -1.622948 | -0.858047 | 2.997409  |

23

C3 SCF Done: -1298.96763972 A.U.

|   |           |           |           |
|---|-----------|-----------|-----------|
| C | -1.604137 | 0.167786  | -0.309461 |
| C | -2.414659 | 1.155171  | 0.283638  |
| C | -3.742929 | 0.839337  | 0.566033  |
| C | -4.232650 | -0.431741 | 0.253962  |
| C | -3.351962 | -1.339071 | -0.341694 |
| N | -2.079029 | -1.054098 | -0.616554 |
| H | -4.391435 | 1.588138  | 1.028431  |
| H | -2.013557 | 2.138372  | 0.517131  |
| H | -5.266540 | -0.714792 | 0.462063  |
| H | -3.692630 | -2.346729 | -0.607735 |
| C | -0.185864 | 0.379745  | -0.657620 |
| C | 0.749140  | 1.456482  | -0.341674 |
| O | 1.899387  | 1.511210  | -0.758196 |
| K | 3.738807  | -0.271206 | 0.089311  |
| H | 0.929142  | 3.073400  | 0.591931  |
| N | 0.405509  | -0.634340 | -1.265987 |
| N | 0.916961  | -1.497140 | -1.775454 |
| O | 0.232711  | 2.406850  | 0.445361  |
| O | 1.853116  | -0.986427 | 1.247780  |
| C | 0.744540  | -1.407078 | 1.892766  |
| H | 0.069817  | -0.581312 | 2.271190  |
| H | 0.044124  | -2.045626 | 1.276085  |
| H | 0.929075  | -2.036342 | 2.814696  |

23

TS-C3C' SCF Done: -1298.96458711 A.U.

|   |           |           |           |
|---|-----------|-----------|-----------|
| C | 1.525826  | 0.195183  | -0.149795 |
| C | 1.468082  | -1.211355 | -0.141769 |
| C | 2.666236  | -1.921451 | -0.218491 |
| C | 3.873851  | -1.219550 | -0.257585 |
| C | 3.824693  | 0.177578  | -0.202425 |
| N | 2.686238  | 0.872998  | -0.161993 |
| H | 2.655561  | -3.014689 | -0.218977 |
| H | 0.497614  | -1.702769 | 0.002313  |
| H | 4.834081  | -1.737269 | -0.310587 |
| H | 4.752822  | 0.761352  | -0.197991 |
| C | 0.290300  | 1.011993  | -0.123817 |
| C | -1.004231 | 0.770890  | -0.775042 |
| O | -1.949621 | 1.538646  | -0.676393 |
| K | -3.589710 | -0.685309 | -0.243854 |
| H | -0.561850 | -1.004414 | -1.309979 |
| N | 0.354854  | 2.157914  | 0.519062  |
| N | 0.408708  | 3.142383  | 1.072371  |
| O | -1.074743 | -0.252729 | -1.656856 |
| O | -1.436958 | -1.258108 | 0.805369  |
| C | -0.976380 | -1.180693 | 2.087644  |
| H | -0.103844 | -1.855526 | 2.313085  |
| H | -0.605631 | -0.157822 | 2.381261  |
| H | -1.732536 | -1.439102 | 2.878755  |

23

C' SCF Done: -1299.02339209 A.U.

|   |          |           |           |
|---|----------|-----------|-----------|
| C | 2.120929 | 0.041170  | -0.010219 |
| C | 2.145392 | -1.366331 | -0.112459 |
| C | 3.380025 | -2.011368 | -0.115586 |
| C | 4.554451 | -1.257113 | -0.018557 |

|   |           |           |           |
|---|-----------|-----------|-----------|
| C | 4.426678  | 0.131637  | 0.078583  |
| N | 3.254651  | 0.767704  | 0.083522  |
| H | 3.424340  | -3.101302 | -0.193995 |
| H | 1.203485  | -1.906741 | -0.185918 |
| H | 5.540543  | -1.726684 | -0.017966 |
| H | 5.321603  | 0.761650  | 0.156341  |
| C | 0.864156  | 0.804464  | 0.000713  |
| C | -0.567753 | 0.330146  | -0.080497 |
| O | -1.452689 | 1.224249  | -0.039565 |
| K | -3.971069 | 1.030345  | -0.087021 |
| H | -2.330931 | -1.295209 | -0.164502 |
| N | 0.987922  | 2.109792  | 0.099022  |
| N | 1.063959  | 3.236535  | 0.182168  |
| O | -0.758415 | -0.908963 | -0.183683 |
| O | -3.323310 | -1.454280 | -0.098241 |
| C | -3.543496 | -2.767452 | 0.359361  |
| H | -3.052179 | -2.965314 | 1.333277  |
| H | -4.626672 | -2.927699 | 0.494701  |
| H | -3.182568 | -3.532424 | -0.357648 |

23

TS-CD' SCF Done: -1299.00459273 A.U.

|   |           |           |           |
|---|-----------|-----------|-----------|
| C | -1.987335 | 0.017163  | -0.021796 |
| C | -2.060282 | 1.426910  | -0.154313 |
| C | -3.311998 | 2.023598  | -0.162763 |
| C | -4.476986 | 1.239386  | -0.042092 |
| C | -4.329625 | -0.136765 | 0.084290  |
| N | -3.118367 | -0.701586 | 0.091389  |
| H | -3.393599 | 3.109135  | -0.264109 |
| H | -1.131175 | 1.987055  | -0.244651 |
| H | -5.471665 | 1.689084  | -0.046599 |
| H | -5.188976 | -0.807686 | 0.182025  |
| C | -0.778773 | -0.792073 | 0.008252  |
| C | 0.649406  | -0.393236 | -0.083438 |
| O | 1.515895  | -1.305259 | -0.020927 |
| K | 4.024981  | -1.151351 | -0.114207 |
| H | 2.429956  | 1.187473  | -0.202507 |
| N | -1.154311 | -2.073365 | 0.146011  |
| N | -2.224466 | -2.551234 | 0.233183  |
| O | 0.882152  | 0.843885  | -0.221868 |
| O | 3.428631  | 1.347609  | -0.123809 |
| C | 3.633780  | 2.611607  | 0.457113  |
| H | 4.712881  | 2.764232  | 0.632375  |
| H | 3.286042  | 3.440632  | -0.193130 |
| H | 3.119360  | 2.719605  | 1.433775  |

23

D' SCF Done: -1299.03601187 A.U.

|   |          |           |           |
|---|----------|-----------|-----------|
| C | 1.875984 | 0.116432  | -0.040156 |
| C | 2.112554 | 1.506135  | -0.179093 |
| C | 3.413611 | 1.956147  | -0.170554 |
| C | 4.498824 | 1.038147  | -0.024625 |
| C | 4.260283 | -0.303544 | 0.108466  |
| N | 2.959102 | -0.732522 | 0.097663  |
| H | 3.626786 | 3.022305  | -0.275615 |
| H | 1.247702 | 2.159549  | -0.287014 |
| H | 5.529858 | 1.395436  | -0.017908 |
| H | 5.020909 | -1.076563 | 0.224154  |

|   |           |           |           |
|---|-----------|-----------|-----------|
| C | 0.772742  | -0.756934 | 0.006170  |
| C | -0.679075 | -0.396285 | -0.092620 |
| O | -1.529405 | -1.316570 | -0.023577 |
| K | -4.046216 | -1.206213 | -0.100948 |
| H | -2.477070 | 1.161842  | -0.221915 |
| N | 1.248627  | -2.014154 | 0.162012  |
| N | 2.551789  | -2.021611 | 0.218793  |
| O | -0.918593 | 0.837016  | -0.243277 |
| O | -3.476709 | 1.303786  | -0.135112 |
| C | -3.698570 | 2.555709  | 0.466454  |
| H | -3.369910 | 3.399850  | -0.174071 |
| H | -4.778689 | 2.687243  | 0.651822  |
| H | -3.178581 | 2.657686  | 1.440745  |

23

A\_pyridazine SCF Done: -534.304425411 A.U.

|   |           |           |           |
|---|-----------|-----------|-----------|
| N | 2.939091  | -1.236214 | -0.064479 |
| C | 3.454250  | -0.376966 | 0.811685  |
| C | 2.911714  | 0.897182  | 1.039328  |
| C | 1.789507  | 1.242997  | 0.308540  |
| C | 1.287417  | 0.295844  | -0.605490 |
| N | 1.863502  | -0.900790 | -0.769739 |
| H | 3.363799  | 1.577151  | 1.765048  |
| H | 4.340147  | -0.722571 | 1.353924  |
| H | 1.298487  | 2.211912  | 0.426020  |
| C | 0.037718  | 0.558980  | -1.414566 |
| H | 0.010368  | 1.616317  | -1.716586 |
| H | 0.091579  | -0.055896 | -2.325969 |
| C | -1.222421 | 0.214450  | -0.637382 |
| C | -2.126720 | 1.210709  | -0.242077 |
| C | -1.487202 | -1.118761 | -0.279863 |
| C | -3.275791 | 0.884125  | 0.488278  |
| H | -1.932416 | 2.252982  | -0.511642 |
| C | -2.633080 | -1.446974 | 0.448515  |
| H | -0.779370 | -1.899133 | -0.572955 |
| C | -3.532583 | -0.445451 | 0.835432  |
| H | -3.971918 | 1.673177  | 0.785971  |
| H | -2.825921 | -2.489560 | 0.716165  |
| H | -4.429752 | -0.702169 | 1.405145  |

26

B\_pyridazine SCF Done: -725.820290138 A.U.

|    |           |           |           |
|----|-----------|-----------|-----------|
| C  | 1.353127  | 0.114878  | 0.320567  |
| C  | 1.701829  | -0.916548 | 1.216345  |
| C  | 3.738410  | -1.075302 | -0.008030 |
| N  | 2.186873  | 0.485201  | -0.659542 |
| H  | 1.007926  | -1.209938 | 2.006723  |
| H  | 4.720756  | -1.517335 | -0.200032 |
| C  | 0.011223  | 0.817453  | 0.428198  |
| H  | -0.117871 | 1.150398  | 1.472730  |
| Li | 1.454964  | 2.025753  | -1.676864 |
| N  | -0.004099 | 1.982904  | -0.473103 |
| N  | -0.909604 | 2.887356  | -0.239589 |
| O  | -1.697960 | 2.711000  | 0.712030  |
| C  | -1.118169 | -0.166312 | 0.119008  |
| C  | -1.110815 | -0.888302 | -1.085432 |
| C  | -2.185599 | -0.346908 | 1.009699  |
| C  | -2.146219 | -1.776755 | -1.391177 |

|                                                |           |           |           |
|------------------------------------------------|-----------|-----------|-----------|
| H                                              | -0.284849 | -0.757346 | -1.790568 |
| C                                              | -3.219131 | -1.239284 | 0.709246  |
| H                                              | -2.210232 | 0.233297  | 1.934432  |
| C                                              | -3.204013 | -1.956475 | -0.492767 |
| H                                              | -2.125553 | -2.332857 | -2.332579 |
| H                                              | -4.045319 | -1.369434 | 1.413860  |
| H                                              | -4.014505 | -2.651317 | -0.729067 |
| N                                              | 3.371879  | -0.103466 | -0.830980 |
| C                                              | 2.929616  | -1.524682 | 1.052558  |
| H                                              | 3.271532  | -2.325259 | 1.712053  |
| 26                                             |           |           |           |
| TS-BC_pyridazine SCF Done: -725.782060766 A.U. |           |           |           |
| C                                              | 1.301014  | -0.100995 | 0.091096  |
| C                                              | 1.608650  | -1.214091 | 0.925979  |
| C                                              | 3.802686  | -1.154520 | -0.018554 |
| N                                              | 2.263311  | 0.395021  | -0.732768 |
| H                                              | 0.856958  | -1.601255 | 1.615374  |
| H                                              | 4.826397  | -1.529874 | -0.108336 |
| C                                              | 0.017281  | 0.589613  | 0.131222  |
| H                                              | -0.266180 | 1.517647  | 1.276537  |
| Li                                             | 1.590223  | 1.838213  | -1.883953 |
| N                                              | 0.067993  | 1.848424  | -0.649930 |
| N                                              | -0.232311 | 2.875298  | 0.026450  |
| O                                              | -0.552594 | 2.638793  | 1.277174  |
| C                                              | -1.267978 | -0.156226 | 0.003220  |
| C                                              | -1.332405 | -1.552652 | -0.211642 |
| C                                              | -2.502866 | 0.536649  | 0.056215  |
| C                                              | -2.554606 | -2.219712 | -0.330022 |
| H                                              | -0.415052 | -2.134801 | -0.311793 |
| C                                              | -3.721276 | -0.131260 | -0.075606 |
| H                                              | -2.513658 | 1.616087  | 0.213586  |
| C                                              | -3.762209 | -1.517910 | -0.261029 |
| H                                              | -2.557723 | -3.301138 | -0.495889 |
| H                                              | -4.651659 | 0.442195  | -0.027451 |
| H                                              | -4.717519 | -2.039969 | -0.358992 |
| N                                              | 3.493602  | -0.117342 | -0.776739 |
| C                                              | 2.873667  | -1.747593 | 0.867001  |
| H                                              | 3.168629  | -2.591504 | 1.495063  |
| 23                                             |           |           |           |
| D_pyridazine SCF Done: -642.494443199 A.U.     |           |           |           |
| N                                              | -3.457671 | 0.561976  | 0.059023  |
| C                                              | -3.816004 | -0.686787 | -0.111495 |
| C                                              | -2.903558 | -1.775361 | -0.268845 |
| C                                              | -1.553687 | -1.528355 | -0.225198 |
| C                                              | -1.137446 | -0.190311 | -0.018016 |
| N                                              | -2.138787 | 0.769511  | 0.090547  |
| H                                              | -3.293463 | -2.781981 | -0.426021 |
| H                                              | -4.895541 | -0.861161 | -0.135561 |
| H                                              | -0.816446 | -2.321257 | -0.352506 |
| C                                              | 0.042138  | 0.570088  | 0.085086  |
| C                                              | 1.454270  | 0.164152  | 0.041889  |
| C                                              | 2.434022  | 1.099611  | -0.346494 |
| C                                              | 1.864537  | -1.135626 | 0.395325  |
| C                                              | 3.781132  | 0.739223  | -0.392528 |
| H                                              | 2.125026  | 2.111433  | -0.616065 |
| C                                              | 3.214142  | -1.493680 | 0.342266  |

|                                              |           |           |           |
|----------------------------------------------|-----------|-----------|-----------|
| H                                            | 1.132172  | -1.866603 | 0.743159  |
| C                                            | 4.177475  | -0.560203 | -0.053879 |
| H                                            | 4.527315  | 1.476899  | -0.699615 |
| H                                            | 3.514897  | -2.506571 | 0.622930  |
| H                                            | 5.232970  | -0.841716 | -0.093785 |
| N                                            | -0.327859 | 1.867838  | 0.226227  |
| N                                            | -1.628403 | 1.997025  | 0.234030  |
| 23                                           |           |           |           |
| A_pyrimidine_i SCF Done: -534.341685407 A.U. |           |           |           |
| C                                            | -1.290589 | 0.028141  | -0.676940 |
| N                                            | -1.746961 | 1.207238  | -0.232176 |
| C                                            | -2.794327 | 1.182444  | 0.596487  |
| C                                            | -3.398473 | -0.011318 | 0.994378  |
| C                                            | -2.846734 | -1.183306 | 0.475270  |
| N                                            | -1.799470 | -1.168992 | -0.354405 |
| H                                            | -3.166554 | 2.148729  | 0.956910  |
| H                                            | -4.254079 | -0.027084 | 1.671860  |
| H                                            | -3.261617 | -2.164271 | 0.735655  |
| C                                            | -0.061400 | 0.047299  | -1.560698 |
| H                                            | -0.081426 | 0.960865  | -2.171539 |
| H                                            | -0.093716 | -0.827977 | -2.224804 |
| C                                            | 1.201179  | 0.014398  | -0.717687 |
| C                                            | 1.818958  | 1.206102  | -0.307182 |
| C                                            | 1.733753  | -1.208840 | -0.279541 |
| C                                            | 2.952103  | 1.176375  | 0.512229  |
| H                                            | 1.403908  | 2.164629  | -0.630821 |
| C                                            | 2.866218  | -1.240641 | 0.540032  |
| H                                            | 1.250122  | -2.142267 | -0.580732 |
| C                                            | 3.480091  | -0.047467 | 0.937800  |
| H                                            | 3.424929  | 2.113500  | 0.819058  |
| H                                            | 3.271663  | -2.201515 | 0.868980  |
| H                                            | 4.367118  | -0.071453 | 1.576617  |
| 26                                           |           |           |           |
| B_pyrimidine_i SCF Done: -725.853652012 A.U. |           |           |           |
| C                                            | 1.360390  | 0.065568  | 0.277426  |
| C                                            | 2.709195  | -1.711765 | 0.776054  |
| C                                            | 3.658810  | -1.287004 | -0.158269 |
| C                                            | 3.360560  | -0.119473 | -0.850350 |
| N                                            | 2.220234  | 0.557434  | -0.635622 |
| H                                            | 2.872918  | -2.618324 | 1.370064  |
| H                                            | 4.584639  | -1.837022 | -0.332764 |
| H                                            | 4.048678  | 0.291566  | -1.595968 |
| C                                            | 0.043999  | 0.793917  | 0.523800  |
| H                                            | -0.038898 | 0.959073  | 1.612661  |
| Li                                           | 1.529646  | 2.295034  | -1.340379 |
| N                                            | 0.062211  | 2.076924  | -0.184083 |
| N                                            | -0.862532 | 2.933880  | 0.147780  |
| O                                            | -1.692551 | 2.598410  | 1.015292  |
| C                                            | -1.119912 | -0.119584 | 0.128082  |
| C                                            | -1.727713 | -0.952626 | 1.078523  |
| C                                            | -1.557707 | -0.181381 | -1.202762 |
| C                                            | -2.756307 | -1.823626 | 0.709336  |
| H                                            | -1.392013 | -0.913638 | 2.117947  |
| C                                            | -2.588207 | -1.051075 | -1.575010 |
| H                                            | -1.097531 | 0.469989  | -1.949931 |
| C                                            | -3.191001 | -1.877049 | -0.620500 |



|                                                  |           |           |           |
|--------------------------------------------------|-----------|-----------|-----------|
| H                                                | -3.224360 | -2.461683 | 1.464326  |
| H                                                | -2.922618 | -1.082134 | -2.615912 |
| H                                                | -3.997887 | -2.556023 | -0.909514 |
| N                                                | 1.575214  | -1.045324 | 0.989055  |
| 26                                               |           |           |           |
| TS-BC_pyrimidine_i SCF Done: -725.818881202 A.U. |           |           |           |
| C                                                | 1.340959  | -0.127177 | 0.029393  |
| C                                                | 2.710752  | -1.921692 | 0.485989  |
| C                                                | 3.820776  | -1.277780 | -0.072768 |
| C                                                | 3.575819  | -0.016913 | -0.607719 |
| N                                                | 2.366917  | 0.554052  | -0.573851 |
| H                                                | 2.806940  | -2.929656 | 0.908468  |
| H                                                | 4.809337  | -1.737154 | -0.100513 |
| H                                                | 4.375798  | 0.553817  | -1.092825 |
| C                                                | 0.050782  | 0.550896  | 0.136859  |
| H                                                | -0.292060 | 1.241318  | 1.350371  |
| Li                                               | 1.714758  | 2.175383  | -1.504046 |
| N                                                | 0.115664  | 1.896682  | -0.453226 |
| N                                                | -0.274064 | 2.808140  | 0.347861  |
| O                                                | -0.672277 | 2.378126  | 1.507902  |
| C                                                | -1.258410 | -0.156806 | -0.037000 |
| C                                                | -1.450723 | -1.522902 | 0.273305  |
| C                                                | -2.390698 | 0.564236  | -0.483031 |
| C                                                | -2.700172 | -2.130278 | 0.126625  |
| H                                                | -0.603561 | -2.102010 | 0.635518  |
| C                                                | -3.639260 | -0.047031 | -0.620729 |
| H                                                | -2.297355 | 1.620784  | -0.738990 |
| C                                                | -3.808233 | -1.401911 | -0.319615 |
| H                                                | -2.806967 | -3.190891 | 0.374018  |
| H                                                | -4.488238 | 0.547279  | -0.971552 |
| H                                                | -4.785510 | -1.880112 | -0.426674 |
| N                                                | 1.506627  | -1.366073 | 0.542536  |
| 23                                               |           |           |           |
| D_pyrimidine_i SCF Done: -642.520453862 A.U.     |           |           |           |
| C                                                | -1.146055 | 0.163265  | 0.000101  |
| N                                                | -1.427016 | 1.479348  | -0.000131 |
| C                                                | -2.696712 | 1.823933  | -0.000215 |
| C                                                | -3.769954 | 0.879194  | -0.000188 |
| C                                                | -3.475780 | -0.457062 | -0.000075 |
| N                                                | -2.153909 | -0.799680 | 0.000108  |
| H                                                | -2.924772 | 2.895162  | -0.000159 |
| H                                                | -4.806947 | 1.215741  | -0.000194 |
| H                                                | -4.197145 | -1.276175 | 0.000058  |
| C                                                | 0.035136  | -0.605876 | -0.000086 |
| C                                                | 1.440694  | -0.183003 | -0.000068 |
| C                                                | 1.793654  | 1.180997  | 0.000250  |
| C                                                | 2.467123  | -1.148797 | -0.000324 |
| C                                                | 3.136981  | 1.563921  | 0.000308  |
| H                                                | 1.008753  | 1.938953  | 0.000518  |
| C                                                | 3.806861  | -0.759302 | -0.000295 |
| H                                                | 2.201745  | -2.207619 | -0.000553 |
| C                                                | 4.149473  | 0.598406  | 0.000027  |
| H                                                | 3.393615  | 2.626773  | 0.000598  |
| H                                                | 4.590610  | -1.521770 | -0.000495 |
| H                                                | 5.199868  | 0.901320  | 0.000063  |
| N                                                | -1.638706 | -2.042616 | 0.000503  |

|                                              |           |           |           |
|----------------------------------------------|-----------|-----------|-----------|
| N                                            | -0.339548 | -1.909401 | 0.000028  |
| 23                                           |           |           |           |
| A_pyrimidine_o SCF Done: -534.342206627 A.U. |           |           |           |
| C                                            | 3.604009  | -0.383082 | 0.016468  |
| N                                            | 3.652443  | 0.951924  | 0.016587  |
| C                                            | 2.471917  | 1.579285  | 0.000650  |
| C                                            | 1.258471  | 0.890457  | -0.014805 |
| C                                            | 1.319106  | -0.508877 | -0.013645 |
| N                                            | 2.507344  | -1.137349 | 0.002440  |
| H                                            | 2.488526  | 2.675627  | 0.000548  |
| H                                            | 4.565156  | -0.911695 | 0.029614  |
| H                                            | 0.307027  | 1.422728  | -0.027016 |
| C                                            | 0.096364  | -1.405691 | -0.032469 |
| H                                            | 0.182117  | -2.044254 | -0.927902 |
| H                                            | 0.185833  | -2.087433 | 0.829796  |
| C                                            | -1.237045 | -0.697848 | -0.013796 |
| C                                            | -1.869927 | -0.327780 | -1.211265 |
| C                                            | -1.852010 | -0.359700 | 1.202587  |
| C                                            | -3.086923 | 0.361257  | -1.195256 |
| H                                            | -1.402216 | -0.583073 | -2.166776 |
| C                                            | -3.068801 | 0.329173  | 1.222920  |
| H                                            | -1.370011 | -0.640017 | 2.143889  |
| C                                            | -3.690241 | 0.692321  | 0.022921  |
| H                                            | -3.567127 | 0.638328  | -2.137779 |
| H                                            | -3.534909 | 0.581257  | 2.179431  |
| H                                            | -4.642422 | 1.229409  | 0.037156  |
| 26                                           |           |           |           |
| B_pyrimidine_o SCF Done: -725.855739268 A.U. |           |           |           |
| C                                            | 1.351169  | 0.115572  | 0.316018  |
| C                                            | 1.701663  | -0.912778 | 1.201708  |
| C                                            | 2.939538  | -1.519315 | 1.024807  |
| C                                            | 3.375249  | -0.177131 | -0.750102 |
| N                                            | 2.206162  | 0.477281  | -0.661514 |
| H                                            | 3.269241  | -2.324265 | 1.691003  |
| H                                            | 1.021107  | -1.222674 | 1.996440  |
| H                                            | 4.048590  | 0.134443  | -1.556412 |
| C                                            | 0.009444  | 0.817224  | 0.426223  |
| H                                            | -0.118283 | 1.146446  | 1.472174  |
| Li                                           | 1.444367  | 2.028245  | -1.676398 |
| N                                            | -0.004578 | 1.984222  | -0.470815 |
| N                                            | -0.904320 | 2.893366  | -0.232419 |
| O                                            | -1.690965 | 2.718251  | 0.720463  |
| C                                            | -1.121928 | -0.164082 | 0.116320  |
| C                                            | -1.121046 | -0.879146 | -1.092229 |
| C                                            | -2.185473 | -0.347902 | 1.010836  |
| C                                            | -2.158611 | -1.765072 | -1.397780 |
| H                                            | -0.298332 | -0.745610 | -1.800716 |
| C                                            | -3.221558 | -1.237206 | 0.710102  |
| H                                            | -2.205006 | 0.226905  | 1.939054  |
| C                                            | -3.212597 | -1.948182 | -0.495591 |
| H                                            | -2.142726 | -2.316536 | -2.341987 |
| H                                            | -4.044744 | -1.369986 | 1.417710  |
| H                                            | -4.024940 | -2.640833 | -0.731900 |
| N                                            | 3.781967  | -1.156372 | 0.044496  |
| 26                                           |           |           |           |

TS-BC\_pyrimidine\_o SCF Done: -725.820188016 A.U.

|    |           |           |           |
|----|-----------|-----------|-----------|
| C  | 1.291666  | -0.109261 | 0.082552  |
| C  | 1.579072  | -1.250713 | 0.878296  |
| C  | 2.855611  | -1.775251 | 0.832648  |
| C  | 3.502768  | -0.193906 | -0.649134 |
| N  | 2.301828  | 0.398270  | -0.691692 |
| H  | 3.116681  | -2.647046 | 1.443579  |
| H  | 0.820683  | -1.678895 | 1.534185  |
| H  | 4.279465  | 0.251938  | -1.283227 |
| C  | 0.017556  | 0.583504  | 0.103638  |
| H  | -0.215932 | 1.495612  | 1.239203  |
| Li | 1.609284  | 1.824935  | -1.885280 |
| N  | 0.072926  | 1.838093  | -0.684651 |
| N  | -0.191156 | 2.870642  | 0.000557  |
| O  | -0.483158 | 2.640652  | 1.255224  |
| C  | -1.281825 | -0.148450 | -0.000257 |
| C  | -1.363899 | -1.531512 | -0.277023 |
| C  | -2.504467 | 0.553213  | 0.126276  |
| C  | -2.595792 | -2.181847 | -0.388153 |
| H  | -0.453832 | -2.113637 | -0.429379 |
| C  | -3.733664 | -0.096888 | 0.001840  |
| H  | -2.496980 | 1.623939  | 0.335391  |
| C  | -3.792722 | -1.472405 | -0.248027 |
| H  | -2.615886 | -3.254277 | -0.603245 |
| H  | -4.656639 | 0.480587  | 0.107541  |
| H  | -4.755819 | -1.981183 | -0.339816 |
| N  | 3.840665  | -1.255000 | 0.066340  |

23

D\_pyrimidine\_o SCF Done: -642.520499384 A.U.

|   |           |           |           |
|---|-----------|-----------|-----------|
| C | 3.470293  | -0.463245 | 0.030418  |
| N | 3.869150  | 0.762320  | -0.091928 |
| C | 2.931002  | 1.758565  | -0.193054 |
| C | 1.575910  | 1.529208  | -0.159538 |
| C | 1.138226  | 0.187993  | -0.012439 |
| N | 2.134771  | -0.776315 | 0.065986  |
| H | 3.320538  | 2.773734  | -0.306723 |
| H | 4.159756  | -1.309252 | 0.108497  |
| H | 0.863063  | 2.347882  | -0.249650 |
| C | -0.046452 | -0.569570 | 0.061639  |
| C | -1.458032 | -0.162854 | 0.029630  |
| C | -2.453210 | -1.122028 | -0.248564 |
| C | -1.855997 | 1.163734  | 0.283181  |
| C | -3.800197 | -0.760428 | -0.281078 |
| H | -2.156940 | -2.154629 | -0.441887 |
| C | -3.205822 | 1.522365  | 0.244801  |
| H | -1.113072 | 1.921386  | 0.535592  |
| C | -4.184076 | 0.564071  | -0.038841 |
| H | -4.556922 | -1.518459 | -0.500313 |
| H | -3.493869 | 2.557476  | 0.446643  |
| H | -5.239815 | 0.845962  | -0.067269 |
| N | 1.611236  | -2.017095 | 0.171850  |
| N | 0.320184  | -1.876190 | 0.165261  |

23

A\_pyrazine SCF Done: -534.331243180 A.U.

|   |           |           |          |
|---|-----------|-----------|----------|
| C | -3.595090 | 0.402361  | 0.169086 |
| C | -3.542947 | -0.993280 | 0.078383 |

|   |           |           |           |
|---|-----------|-----------|-----------|
| N | -2.384377 | -1.631648 | -0.098012 |
| C | -1.283572 | -0.880605 | -0.183358 |
| C | -1.325100 | 0.522881  | -0.096020 |
| N | -2.495922 | 1.151768  | 0.082735  |
| H | -4.551621 | 0.916674  | 0.317104  |
| H | -4.455796 | -1.594760 | 0.151242  |
| H | -0.331030 | -1.399570 | -0.325286 |
| C | -0.094932 | 1.402697  | -0.218154 |
| H | -0.153247 | 1.914686  | -1.194337 |
| H | -0.187434 | 2.193674  | 0.543598  |
| C | 1.232008  | 0.691531  | -0.085780 |
| C | 1.952368  | 0.287051  | -1.220415 |
| C | 1.753968  | 0.390068  | 1.183204  |
| C | 3.164111  | -0.400808 | -1.092697 |
| H | 1.558203  | 0.513266  | -2.215579 |
| C | 2.964011  | -0.297073 | 1.315066  |
| H | 1.203142  | 0.697775  | 2.077070  |
| C | 3.673486  | -0.695563 | 0.176091  |
| H | 3.712593  | -0.705917 | -1.988123 |
| H | 3.356515  | -0.520593 | 2.310921  |
| H | 4.620901  | -1.231624 | 0.277887  |

26

B\_pyrazine SCF Done: -725.844310822 A.U.

|    |           |           |           |
|----|-----------|-----------|-----------|
| C  | 1.357839  | 0.132015  | 0.302935  |
| C  | 1.722287  | -0.888772 | 1.203385  |
| C  | 3.711751  | -1.175853 | 0.133634  |
| C  | 3.375230  | -0.169071 | -0.768132 |
| N  | 2.203933  | 0.481740  | -0.679757 |
| H  | 1.032328  | -1.174621 | 2.004541  |
| H  | 4.669685  | -1.699556 | 0.053396  |
| H  | 4.057230  | 0.120812  | -1.572785 |
| C  | 0.010525  | 0.821219  | 0.420023  |
| H  | -0.118564 | 1.155913  | 1.463989  |
| Li | 1.423202  | 2.025532  | -1.703134 |
| N  | -0.012734 | 1.984764  | -0.483004 |
| N  | -0.917840 | 2.889833  | -0.249018 |
| O  | -1.701709 | 2.716747  | 0.706234  |
| C  | -1.116302 | -0.167131 | 0.115434  |
| C  | -1.106322 | -0.898701 | -1.083244 |
| C  | -2.185492 | -0.341770 | 1.005331  |
| C  | -2.140229 | -1.790664 | -1.383950 |
| H  | -0.279331 | -0.773386 | -1.788218 |
| C  | -3.217535 | -1.237452 | 0.709970  |
| H  | -2.211798 | 0.245033  | 1.925801  |
| C  | -3.199543 | -1.964250 | -0.486213 |
| H  | -2.117096 | -2.354608 | -2.320631 |
| H  | -4.044522 | -1.363255 | 1.414432  |
| H  | -4.008606 | -2.662188 | -0.718216 |
| N  | 2.882569  | -1.530929 | 1.123520  |

26

TS-BC\_pyrazine SCF Done: -725.806194053 A.U.

|   |          |           |           |
|---|----------|-----------|-----------|
| C | 1.309833 | -0.075903 | 0.075471  |
| C | 1.631030 | -1.183721 | 0.916704  |
| C | 3.761019 | -1.272570 | 0.096209  |
| C | 3.490333 | -0.186290 | -0.724368 |
| N | 2.283595 | 0.403800  | -0.746092 |

|    |           |           |           |
|----|-----------|-----------|-----------|
| H  | 0.876714  | -1.564232 | 1.612845  |
| H  | 4.747564  | -1.745625 | 0.102112  |
| H  | 4.259678  | 0.222070  | -1.387999 |
| C  | 0.018384  | 0.599814  | 0.123738  |
| H  | -0.276335 | 1.512624  | 1.272828  |
| Li | 1.547252  | 1.845355  | -1.902865 |
| N  | 0.059796  | 1.862663  | -0.647164 |
| N  | -0.251467 | 2.883445  | 0.034943  |
| O  | -0.577190 | 2.634198  | 1.280138  |
| C  | -1.262314 | -0.155180 | -0.002222 |
| C  | -1.316947 | -1.554382 | -0.200482 |
| C  | -2.501565 | 0.530615  | 0.037056  |
| C  | -2.534291 | -2.230194 | -0.317162 |
| H  | -0.395633 | -2.132337 | -0.286647 |
| C  | -3.715279 | -0.146517 | -0.092313 |
| H  | -2.520517 | 1.611659  | 0.181464  |
| C  | -3.746686 | -1.535257 | -0.262031 |
| H  | -2.529670 | -3.313580 | -0.469375 |
| H  | -4.649355 | 0.421696  | -0.054736 |
| H  | -4.698236 | -2.064540 | -0.357779 |
| N  | 2.816711  | -1.764175 | 0.922766  |

23

D\_pyrazine SCF Done: -642.512933471 A.U.

|   |           |           |           |
|---|-----------|-----------|-----------|
| C | -3.471920 | 0.474893  | -0.034468 |
| C | -3.789239 | -0.849549 | 0.101476  |
| N | -2.853770 | -1.841502 | 0.210713  |
| C | -1.583228 | -1.517686 | 0.168387  |
| C | -1.147818 | -0.172737 | 0.011763  |
| N | -2.139542 | 0.793632  | -0.070382 |
| H | -4.183253 | 1.297390  | -0.111870 |
| H | -4.839726 | -1.149567 | 0.133866  |
| H | -0.843386 | -2.317415 | 0.265832  |
| C | 0.044106  | 0.581232  | -0.063618 |
| C | 1.453924  | 0.167342  | -0.030716 |
| C | 1.846527  | -1.158916 | -0.292886 |
| C | 2.451151  | 1.121299  | 0.256968  |
| C | 3.194791  | -1.522956 | -0.254116 |
| H | 1.100940  | -1.911635 | -0.552673 |
| C | 3.796562  | 0.754418  | 0.290063  |
| H | 2.157457  | 2.153234  | 0.457515  |
| C | 4.175408  | -0.569896 | 0.038804  |
| H | 3.479642  | -2.557514 | -0.462765 |
| H | 4.555854  | 1.507567  | 0.516826  |
| H | 5.230025  | -0.855927 | 0.067536  |
| N | -0.315587 | 1.882152  | -0.171331 |
| N | -1.616694 | 2.021318  | -0.178171 |

22

A\_triazine SCF Done: -550.373466455 A.U.

|   |           |           |           |
|---|-----------|-----------|-----------|
| C | -1.296034 | -0.023806 | 0.667308  |
| N | -1.771457 | -1.195825 | 0.222609  |
| C | -2.805347 | -1.116804 | -0.613264 |
| C | -2.833675 | 1.127961  | -0.525422 |
| N | -1.801398 | 1.167068  | 0.315572  |
| H | -3.218605 | -2.058568 | -0.993965 |
| H | -3.270484 | 2.086191  | -0.831577 |
| C | -0.081521 | -0.044203 | 1.562284  |

|   |           |           |           |
|---|-----------|-----------|-----------|
| H | -0.110280 | -0.958092 | 2.171750  |
| H | -0.118039 | 0.833615  | 2.222417  |
| C | 1.184722  | -0.015537 | 0.721988  |
| C | 1.790551  | -1.210418 | 0.303682  |
| C | 1.729978  | 1.206889  | 0.298660  |
| C | 2.927873  | -1.184090 | -0.509748 |
| H | 1.364587  | -2.167549 | 0.616847  |
| C | 2.866817  | 1.234364  | -0.514953 |
| H | 1.255332  | 2.142418  | 0.607194  |
| C | 3.469886  | 0.038560  | -0.920828 |
| H | 3.392796  | -2.122859 | -0.823152 |
| H | 3.283822  | 2.193926  | -0.832730 |
| H | 4.360098  | 0.059498  | -1.555207 |
| N | -3.378392 | 0.016459  | -1.023869 |

25

B triazine SCF Done: -741.883654170 A.U.

|    |           |           |           |
|----|-----------|-----------|-----------|
| C  | -1.358332 | 0.040191  | -0.274202 |
| C  | -2.699937 | -1.729608 | -0.710974 |
| C  | -3.350121 | -0.209949 | 0.809762  |
| N  | -2.240961 | 0.518669  | 0.625002  |
| H  | -2.893761 | -2.652796 | -1.269306 |
| H  | -4.076138 | 0.160739  | 1.541891  |
| C  | -0.061393 | 0.790080  | -0.520726 |
| H  | 0.012889  | 0.958334  | -1.610404 |
| Li | -1.584996 | 2.281103  | 1.343832  |
| N  | -0.107972 | 2.067237  | 0.193783  |
| N  | 0.795497  | 2.946990  | -0.139914 |
| O  | 1.626723  | 2.633325  | -1.012846 |
| C  | 1.116336  | -0.110281 | -0.131895 |
| C  | 1.722838  | -0.941593 | -1.084370 |
| C  | 1.567066  | -0.156714 | 1.194920  |
| C  | 2.767167  | -1.795735 | -0.720503 |
| H  | 1.375639  | -0.913798 | -2.120330 |
| C  | 2.613557  | -1.009769 | 1.560893  |
| H  | 1.106438  | 0.493980  | 1.942203  |
| C  | 3.216752  | -1.833504 | 0.604840  |
| H  | 3.235707  | -2.432372 | -1.476223 |
| H  | 2.959951  | -1.029386 | 2.598020  |
| H  | 4.036181  | -2.499162 | 0.889271  |
| N  | -1.564917 | -1.087432 | -0.963065 |
| N  | -3.627260 | -1.338915 | 0.171289  |

25

TS-BC triazine SCF Done: -741.854562703 A.U.

|    |           |           |           |
|----|-----------|-----------|-----------|
| C  | 1.329561  | -0.156393 | 0.011796  |
| C  | 2.692941  | -1.943542 | 0.397132  |
| C  | 3.565836  | -0.106894 | -0.542879 |
| N  | 2.391952  | 0.520771  | -0.538597 |
| H  | 2.816124  | -2.969672 | 0.765421  |
| H  | 4.415306  | 0.435159  | -0.976411 |
| C  | 0.063641  | 0.539009  | 0.118902  |
| H  | -0.206727 | 1.189505  | 1.326001  |
| Li | 1.790642  | 2.178525  | -1.466810 |
| N  | 0.152678  | 1.888727  | -0.465545 |
| N  | -0.189721 | 2.797359  | 0.362869  |
| O  | -0.555909 | 2.367705  | 1.525405  |
| C  | -1.265611 | -0.144736 | -0.040252 |

|                                            |           |           |           |
|--------------------------------------------|-----------|-----------|-----------|
| C                                          | -1.496297 | -1.485909 | 0.336184  |
| C                                          | -2.365891 | 0.588777  | -0.535083 |
| C                                          | -2.761007 | -2.064276 | 0.200583  |
| H                                          | -0.671496 | -2.072404 | 0.735797  |
| C                                          | -3.629823 | 0.006970  | -0.662416 |
| H                                          | -2.234691 | 1.629136  | -0.836965 |
| C                                          | -3.839453 | -1.326312 | -0.298458 |
| H                                          | -2.903165 | -3.107433 | 0.498126  |
| H                                          | -4.457090 | 0.606333  | -1.053484 |
| H                                          | -4.828335 | -1.781737 | -0.397605 |
| N                                          | 1.481362  | -1.422784 | 0.466428  |
| N                                          | 3.789734  | -1.333539 | -0.078976 |
| 22                                         |           |           |           |
| D triazine SCF Done: -658.546819460 A.U.   |           |           |           |
| C                                          | -3.469004 | -0.389954 | -0.000164 |
| N                                          | -3.765639 | 0.873590  | -0.000160 |
| C                                          | -2.733860 | 1.777885  | -0.000218 |
| C                                          | -1.146342 | 0.175675  | 0.000053  |
| N                                          | -2.160653 | -0.780562 | -0.000030 |
| H                                          | -3.021034 | 2.833512  | 0.000008  |
| H                                          | -4.223919 | -1.183422 | -0.000165 |
| C                                          | 0.027273  | -0.594323 | 0.000129  |
| C                                          | 1.435337  | -0.181567 | 0.000098  |
| C                                          | 2.454458  | -1.154108 | -0.000229 |
| C                                          | 1.793706  | 1.180638  | 0.000306  |
| C                                          | 3.796293  | -0.771570 | -0.000291 |
| H                                          | 2.183426  | -2.211463 | -0.000417 |
| C                                          | 3.138787  | 1.556191  | 0.000171  |
| H                                          | 1.014182  | 1.944366  | 0.000445  |
| C                                          | 4.145295  | 0.584271  | -0.000110 |
| H                                          | 4.576111  | -1.537876 | -0.000560 |
| H                                          | 3.401565  | 2.617380  | 0.000276  |
| H                                          | 5.197267  | 0.881467  | -0.000175 |
| N                                          | -1.655013 | -2.029032 | 0.000250  |
| N                                          | -0.359671 | -1.899958 | 0.000230  |
| N                                          | -1.456060 | 1.486993  | 0.000012  |
| 22                                         |           |           |           |
| A triazine_3 SCF Done: -550.297840696 A.U. |           |           |           |
| C                                          | 1.290076  | 0.296881  | 0.600027  |
| C                                          | 2.959055  | 0.828524  | -0.977015 |
| N                                          | 1.823379  | -0.936145 | 0.680731  |
| H                                          | 3.483790  | 1.488703  | -1.674513 |
| C                                          | 0.054776  | 0.559089  | 1.423647  |
| H                                          | 0.037340  | 1.615626  | 1.727107  |
| H                                          | 0.113611  | -0.061991 | 2.330213  |
| C                                          | -1.208950 | 0.222330  | 0.646679  |
| C                                          | -2.069110 | 1.234154  | 0.196352  |
| C                                          | -1.515739 | -1.114507 | 0.341889  |
| C                                          | -3.218944 | 0.918373  | -0.536852 |
| H                                          | -1.840687 | 2.278958  | 0.425490  |
| C                                          | -2.662458 | -1.430971 | -0.390768 |
| H                                          | -0.842897 | -1.907974 | 0.678226  |
| C                                          | -3.518802 | -0.414778 | -0.832374 |
| H                                          | -3.882074 | 1.718507  | -0.876986 |
| H                                          | -2.889603 | -2.476136 | -0.617890 |
| H                                          | -4.416801 | -0.662813 | -1.404517 |

|                                                |           |           |           |
|------------------------------------------------|-----------|-----------|-----------|
| N                                              | 3.447703  | -0.415041 | -0.862390 |
| C                                              | 1.852761  | 1.248484  | -0.253122 |
| H                                              | 1.445859  | 2.257776  | -0.343654 |
| N                                              | 2.873984  | -1.268263 | -0.040378 |
| 25                                             |           |           |           |
| B_triazine_3 SCF Done: -741.811189968 A.U.     |           |           |           |
| C                                              | -1.346496 | 0.080570  | -0.329555 |
| C                                              | -2.921015 | -1.557482 | -0.964873 |
| N                                              | -2.214737 | 0.457499  | 0.626393  |
| H                                              | -3.293284 | -2.384635 | -1.575931 |
| C                                              | -0.024127 | 0.810617  | -0.432608 |
| H                                              | 0.096977  | 1.141453  | -1.479408 |
| Li                                             | -1.523264 | 2.038222  | 1.649313  |
| N                                              | -0.046139 | 1.976236  | 0.465403  |
| N                                              | 0.844458  | 2.897850  | 0.236752  |
| O                                              | 1.644271  | 2.730295  | -0.705259 |
| C                                              | 1.121624  | -0.153409 | -0.121436 |
| C                                              | 2.176957  | -0.337930 | -1.025102 |
| C                                              | 1.137650  | -0.852535 | 1.096099  |
| C                                              | 3.224128  | -1.213433 | -0.723168 |
| H                                              | 2.182158  | 0.224939  | -1.960885 |
| C                                              | 2.186621  | -1.724734 | 1.402162  |
| H                                              | 0.321266  | -0.715786 | 1.811449  |
| C                                              | 3.233020  | -1.909021 | 0.491551  |
| H                                              | 4.042001  | -1.347171 | -1.436604 |
| H                                              | 2.185651  | -2.263967 | 2.353412  |
| H                                              | 4.054272  | -2.590777 | 0.728531  |
| N                                              | -3.743167 | -1.136406 | 0.016462  |
| C                                              | -1.683822 | -0.978594 | -1.179684 |
| H                                              | -1.004485 | -1.321218 | -1.962335 |
| N                                              | -3.382725 | -0.150060 | 0.788645  |
| 25                                             |           |           |           |
| TS-BC_triazine_3 SCF Done: -741.778805275 A.U. |           |           |           |
| C                                              | -1.272852 | -0.150474 | -0.097467 |
| C                                              | -2.812369 | -1.810376 | -0.817981 |
| N                                              | -2.311780 | 0.357872  | 0.640239  |
| H                                              | -3.110359 | -2.693083 | -1.391274 |
| C                                              | -0.027848 | 0.575301  | -0.089594 |
| H                                              | 0.149686  | 1.509214  | -1.188587 |
| Li                                             | -1.732639 | 1.798233  | 1.874097  |
| N                                              | -0.118563 | 1.803566  | 0.743016  |
| N                                              | 0.102835  | 2.861716  | 0.081275  |
| O                                              | 0.376228  | 2.679491  | -1.181933 |
| C                                              | 1.289279  | -0.133363 | -0.004079 |
| C                                              | 1.395609  | -1.489036 | 0.372661  |
| C                                              | 2.491801  | 0.569054  | -0.244483 |
| C                                              | 2.638560  | -2.120585 | 0.471621  |
| H                                              | 0.498570  | -2.062546 | 0.614140  |
| C                                              | 3.733202  | -0.059637 | -0.129773 |
| H                                              | 2.456426  | 1.620816  | -0.533290 |
| C                                              | 3.817429  | -1.411826 | 0.220346  |
| H                                              | 2.683109  | -3.173214 | 0.765408  |
| H                                              | 4.644189  | 0.513710  | -0.323441 |
| H                                              | 4.789699  | -1.904281 | 0.304140  |
| N                                              | -3.795651 | -1.239354 | -0.073081 |
| C                                              | -1.532352 | -1.316514 | -0.863138 |



|                                              |           |           |           |
|----------------------------------------------|-----------|-----------|-----------|
| H                                            | -0.760175 | -1.776281 | -1.481041 |
| N                                            | -3.517671 | -0.180975 | 0.631185  |
| 22                                           |           |           |           |
| D triazine_3 SCF Done: -658.478057925 A.U.   |           |           |           |
| N                                            | 3.867405  | 0.648595  | 0.000021  |
| C                                            | 2.988662  | 1.702451  | 0.000102  |
| C                                            | 1.143475  | 0.217318  | -0.000008 |
| N                                            | 2.137019  | -0.760927 | -0.000075 |
| H                                            | 3.455769  | 2.688650  | 0.000172  |
| C                                            | -0.044213 | -0.538626 | -0.000050 |
| C                                            | -1.460230 | -0.142046 | -0.000013 |
| C                                            | -2.455473 | -1.140839 | 0.000285  |
| C                                            | -1.863001 | 1.206714  | -0.000271 |
| C                                            | -3.807246 | -0.797653 | 0.000328  |
| H                                            | -2.155994 | -2.190037 | 0.000488  |
| C                                            | -3.218103 | 1.545750  | -0.000222 |
| H                                            | -1.123665 | 2.007206  | -0.000529 |
| C                                            | -4.196633 | 0.546947  | 0.000079  |
| H                                            | -4.563528 | -1.587075 | 0.000564  |
| H                                            | -3.508800 | 2.599448  | -0.000428 |
| H                                            | -5.256523 | 0.814040  | 0.000117  |
| N                                            | 1.619648  | -1.992059 | -0.000094 |
| N                                            | 0.324513  | -1.847728 | -0.000138 |
| C                                            | 1.623357  | 1.543761  | 0.000091  |
| H                                            | 0.953590  | 2.402896  | 0.000143  |
| N                                            | 3.470784  | -0.561850 | -0.000063 |
| 22                                           |           |           |           |
| A triazine_2_1 SCF Done: -550.324805173 A.U. |           |           |           |
| C                                            | 1.306568  | -0.137297 | 0.622085  |
| C                                            | 2.648079  | 1.311921  | -0.486174 |
| N                                            | 2.005993  | -1.204711 | 0.221719  |
| H                                            | 2.920340  | 2.333306  | -0.775934 |
| C                                            | 0.083965  | -0.388032 | 1.471858  |
| H                                            | 0.106064  | 0.312231  | 2.320858  |
| H                                            | 0.139634  | -1.413753 | 1.860268  |
| C                                            | -1.193946 | -0.191582 | 0.675063  |
| C                                            | -1.778497 | 1.079509  | 0.559698  |
| C                                            | -1.782656 | -1.271564 | -0.001475 |
| C                                            | -2.932841 | 1.265096  | -0.207507 |
| H                                            | -1.321379 | 1.929175  | 1.073474  |
| C                                            | -2.937651 | -1.087875 | -0.768444 |
| H                                            | -1.329882 | -2.264354 | 0.074054  |
| C                                            | -3.516732 | 0.181505  | -0.873327 |
| H                                            | -3.379425 | 2.260337  | -0.284047 |
| H                                            | -3.387421 | -1.940232 | -1.285020 |
| H                                            | -4.420884 | 0.325851  | -1.470852 |
| N                                            | 3.063950  | -1.027016 | -0.562388 |
| C                                            | 3.396645  | 0.205806  | -0.925232 |
| H                                            | 4.271520  | 0.317293  | -1.572533 |
| N                                            | 1.593460  | 1.136759  | 0.292164  |
| 25                                           |           |           |           |
| B triazine_2_1 SCF Done: -741.837622593 A.U. |           |           |           |
| C                                            | -1.357950 | 0.041565  | -0.284309 |
| C                                            | -2.689236 | -1.731305 | -0.747785 |
| N                                            | -2.224274 | 0.523715  | 0.617258  |

|                                                  |           |           |           |
|--------------------------------------------------|-----------|-----------|-----------|
| H                                                | -2.895552 | -2.649466 | -1.309375 |
| C                                                | -0.059721 | 0.793056  | -0.521441 |
| H                                                | 0.019527  | 0.970389  | -1.609101 |
| Li                                               | -1.594299 | 2.271969  | 1.350042  |
| N                                                | -0.106773 | 2.066204  | 0.203236  |
| N                                                | 0.804608  | 2.942608  | -0.117334 |
| O                                                | 1.640523  | 2.630610  | -0.986649 |
| C                                                | 1.114376  | -0.111349 | -0.133143 |
| C                                                | 1.740681  | -0.918431 | -1.093483 |
| C                                                | 1.540807  | -0.189100 | 1.200468  |
| C                                                | 2.780811  | -1.778592 | -0.731179 |
| H                                                | 1.413332  | -0.865632 | -2.135054 |
| C                                                | 2.582846  | -1.047892 | 1.565129  |
| H                                                | 1.063165  | 0.440630  | 1.955116  |
| C                                                | 3.206293  | -1.846803 | 0.600778  |
| H                                                | 3.265096  | -2.395634 | -1.493227 |
| H                                                | 2.909893  | -1.091882 | 2.607793  |
| H                                                | 4.022411  | -2.516912 | 0.884313  |
| N                                                | -1.563791 | -1.086014 | -0.988561 |
| C                                                | -3.602936 | -1.246442 | 0.210781  |
| H                                                | -4.537161 | -1.767472 | 0.437323  |
| N                                                | -3.358028 | -0.128377 | 0.872599  |
| 25                                               |           |           |           |
| TS-BC_triazine_2_1 SCF Done: -741.805345458 A.U. |           |           |           |
| C                                                | 1.332393  | -0.161458 | 0.022206  |
| C                                                | 2.698248  | -1.942409 | 0.432648  |
| N                                                | 2.367105  | 0.519662  | -0.561342 |
| H                                                | 2.842005  | -2.962088 | 0.810101  |
| C                                                | 0.062232  | 0.535716  | 0.134765  |
| H                                                | -0.235762 | 1.216731  | 1.342293  |
| Li                                               | 1.793566  | 2.173604  | -1.473518 |
| N                                                | 0.152068  | 1.880941  | -0.460910 |
| N                                                | -0.204703 | 2.797257  | 0.350935  |
| O                                                | -0.585957 | 2.377194  | 1.516168  |
| C                                                | -1.261246 | -0.151582 | -0.034279 |
| C                                                | -1.487036 | -1.499157 | 0.325747  |
| C                                                | -2.367567 | 0.580265  | -0.521032 |
| C                                                | -2.748779 | -2.082417 | 0.184549  |
| H                                                | -0.661173 | -2.087627 | 0.720356  |
| C                                                | -3.628533 | -0.006492 | -0.653349 |
| H                                                | -2.243167 | 1.624327  | -0.812695 |
| C                                                | -3.832152 | -1.344848 | -0.304485 |
| H                                                | -2.884847 | -3.129750 | 0.470351  |
| H                                                | -4.458888 | 0.593409  | -1.037195 |
| H                                                | -4.818886 | -1.804003 | -0.407588 |
| N                                                | 3.578937  | -0.007384 | -0.612442 |
| N                                                | 1.491740  | -1.423605 | 0.499163  |
| C                                                | 3.778948  | -1.216835 | -0.110561 |
| H                                                | 4.792591  | -1.622154 | -0.159492 |
| 22                                               |           |           |           |
| D_triazine_2_1 SCF Done: -658.510141362 A.U.     |           |           |           |
| C                                                | 2.729761  | 1.787314  | 0.000028  |
| C                                                | 1.145596  | 0.184079  | 0.000001  |
| N                                                | 2.158831  | -0.776397 | -0.000029 |
| H                                                | 3.024205  | 2.841030  | 0.000049  |
| C                                                | -0.028504 | -0.588067 | -0.000016 |

|   |           |           |           |
|---|-----------|-----------|-----------|
| C | -1.437129 | -0.176159 | -0.000001 |
| C | -2.454161 | -1.150890 | 0.000184  |
| C | -1.797722 | 1.185336  | -0.000167 |
| C | -3.796570 | -0.770886 | 0.000199  |
| H | -2.180383 | -2.207504 | 0.000318  |
| C | -3.143418 | 1.558534  | -0.000149 |
| H | -1.019830 | 1.950757  | -0.000306 |
| C | -4.147845 | 0.584471  | 0.000034  |
| H | -4.575125 | -1.538439 | 0.000345  |
| H | -3.408394 | 2.619157  | -0.000280 |
| H | -5.200377 | 0.879690  | 0.000048  |
| N | 1.662814  | -2.012317 | -0.000051 |
| N | 0.358422  | -1.889104 | -0.000026 |
| N | 3.463598  | -0.510615 | -0.000036 |
| N | 1.452449  | 1.493625  | 0.000031  |
| C | 3.743810  | 0.767335  | -0.000010 |
| H | 4.804189  | 1.032579  | -0.000016 |

22

A\_triazine\_2 SCF Done: -550.325268219 A.U.

|   |           |           |           |
|---|-----------|-----------|-----------|
| C | 1.295747  | 0.279443  | 0.600704  |
| C | 0.056052  | 0.565815  | 1.408758  |
| H | 0.042887  | 1.628378  | 1.692640  |
| H | 0.109158  | -0.034453 | 2.329835  |
| C | -1.209285 | 0.221224  | 0.638590  |
| C | -2.087014 | 1.224508  | 0.203607  |
| C | -1.502971 | -1.117446 | 0.328586  |
| C | -3.240563 | 0.898696  | -0.519572 |
| H | -1.868793 | 2.270813  | 0.436185  |
| C | -2.653649 | -1.444362 | -0.392963 |
| H | -0.816736 | -1.904624 | 0.653353  |
| C | -3.527282 | -0.436278 | -0.819499 |
| H | -3.916659 | 1.692552  | -0.848717 |
| H | -2.870450 | -2.490979 | -0.623620 |
| H | -4.428119 | -0.692131 | -1.383694 |
| N | 2.932786  | -1.221926 | 0.002643  |
| C | 1.834635  | 1.211478  | -0.313545 |
| H | 1.380695  | 2.202190  | -0.434062 |
| C | 3.402752  | -0.314629 | -0.847184 |
| H | 4.281213  | -0.606272 | -1.432093 |
| N | 1.866367  | -0.918658 | 0.736373  |
| N | 2.897457  | 0.912559  | -1.041119 |

25

B\_triazine\_2 SCF Done: -741.838290100 A.U.

|    |           |           |           |
|----|-----------|-----------|-----------|
| C  | -1.353135 | 0.103638  | -0.310087 |
| N  | -2.221284 | 0.478317  | 0.629993  |
| C  | -0.026454 | 0.821043  | -0.424202 |
| H  | 0.093926  | 1.154064  | -1.470547 |
| Li | -1.520821 | 2.059154  | 1.651063  |
| N  | -0.037213 | 1.985378  | 0.476621  |
| N  | 0.863963  | 2.897996  | 0.253468  |
| O  | 1.662902  | 2.726362  | -0.688259 |
| C  | 1.112423  | -0.153137 | -0.118658 |
| C  | 2.171927  | -0.332999 | -1.018686 |
| C  | 1.117512  | -0.867998 | 1.089922  |
| C  | 3.211879  | -1.218606 | -0.722004 |
| H  | 2.185291  | 0.241229  | -1.947399 |

|                                                |           |           |           |
|------------------------------------------------|-----------|-----------|-----------|
| C                                              | 2.159764  | -1.750053 | 1.391162  |
| H                                              | 0.297889  | -0.735468 | 1.802272  |
| C                                              | 3.209969  | -1.929294 | 0.484122  |
| H                                              | 4.032582  | -1.348943 | -1.432810 |
| H                                              | 2.150146  | -2.301293 | 2.335467  |
| H                                              | 4.025527  | -2.619348 | 0.716718  |
| C                                              | -3.656763 | -1.151094 | -0.063909 |
| H                                              | -4.622292 | -1.648451 | 0.070429  |
| N                                              | -3.388823 | -0.154224 | 0.764456  |
| N                                              | -2.849555 | -1.595199 | -1.044592 |
| C                                              | -1.693544 | -0.973592 | -1.164269 |
| H                                              | -0.994904 | -1.303471 | -1.941213 |
| 25                                             |           |           |           |
| TS-BC_triazine_2 SCF Done: -741.803335996 A.U. |           |           |           |
| C                                              | -1.289282 | -0.114625 | -0.078243 |
| N                                              | -2.299762 | 0.355456  | 0.695942  |
| C                                              | -0.029918 | 0.597280  | -0.099903 |
| H                                              | 0.186889  | 1.550799  | -1.207949 |
| Li                                             | -1.684456 | 1.798546  | 1.905928  |
| N                                              | -0.104600 | 1.827091  | 0.729263  |
| N                                              | 0.145564  | 2.882856  | 0.076545  |
| O                                              | 0.434788  | 2.698048  | -1.186064 |
| C                                              | 1.270386  | -0.134727 | -0.000963 |
| C                                              | 1.347035  | -1.502340 | 0.341989  |
| C                                              | 2.491813  | 0.549024  | -0.203958 |
| C                                              | 2.575676  | -2.161758 | 0.438621  |
| H                                              | 0.437102  | -2.064493 | 0.561701  |
| C                                              | 3.718256  | -0.107456 | -0.089162 |
| H                                              | 2.482420  | 1.608341  | -0.465880 |
| C                                              | 3.771906  | -1.470807 | 0.223418  |
| H                                              | 2.594560  | -3.222701 | 0.704014  |
| H                                              | 4.642950  | 0.453019  | -0.253788 |
| H                                              | 4.733094  | -1.984558 | 0.306916  |
| N                                              | -3.505305 | -0.218459 | 0.664778  |
| C                                              | -3.692355 | -1.260886 | -0.117760 |
| H                                              | -4.691164 | -1.706980 | -0.117183 |
| C                                              | -1.567061 | -1.255451 | -0.901194 |
| H                                              | -0.785560 | -1.662875 | -1.551929 |
| N                                              | -2.750749 | -1.815529 | -0.921135 |
| 22                                             |           |           |           |
| D_triazine_2 SCF Done: -658.514037357 A.U.     |           |           |           |
| C                                              | -1.153175 | -0.205098 | -0.000014 |
| N                                              | -2.141095 | 0.775165  | -0.000107 |
| C                                              | 0.040808  | 0.546134  | -0.000144 |
| C                                              | 1.455629  | 0.144733  | -0.000052 |
| C                                              | 2.452796  | 1.141771  | 0.000408  |
| C                                              | 1.854707  | -1.204960 | -0.000422 |
| C                                              | 3.803686  | 0.795724  | 0.000498  |
| H                                              | 2.154924  | 2.191326  | 0.000704  |
| C                                              | 3.208821  | -1.547007 | -0.000323 |
| H                                              | 1.113422  | -2.004032 | -0.000821 |
| C                                              | 4.189315  | -0.549986 | 0.000137  |
| H                                              | 4.562030  | 1.583082  | 0.000863  |
| H                                              | 3.497327  | -2.601232 | -0.000625 |
| H                                              | 5.248581  | -0.819627 | 0.000210  |
| N                                              | -1.623791 | 1.995243  | -0.000627 |

|                                            |           |           |           |
|--------------------------------------------|-----------|-----------|-----------|
| N                                          | -0.321148 | 1.852509  | -0.000297 |
| N                                          | -3.458179 | 0.552434  | -0.000017 |
| C                                          | -3.782362 | -0.715824 | 0.000234  |
| H                                          | -4.854736 | -0.929887 | 0.000294  |
| C                                          | -1.642822 | -1.536149 | 0.000270  |
| H                                          | -0.953567 | -2.385429 | 0.000415  |
| N                                          | -2.931844 | -1.782528 | 0.000393  |
| 22                                         |           |           |           |
| A_triazine_1 SCF Done: -550.326414155 A.U. |           |           |           |
| C                                          | 1.289916  | -0.224502 | 0.622872  |
| C                                          | 2.785596  | 1.240517  | -0.241751 |
| H                                          | 3.161444  | 2.265774  | -0.327097 |
| C                                          | 0.060748  | -0.522306 | 1.443846  |
| H                                          | 0.098649  | 0.105108  | 2.347490  |
| H                                          | 0.071694  | -1.576877 | 1.753338  |
| C                                          | -1.207638 | -0.223052 | 0.659657  |
| C                                          | -1.613702 | 1.105172  | 0.449521  |
| C                                          | -1.967989 | -1.260700 | 0.100588  |
| C                                          | -2.761242 | 1.387510  | -0.296246 |
| H                                          | -1.018587 | 1.919898  | 0.869958  |
| C                                          | -3.117775 | -0.979238 | -0.645830 |
| H                                          | -1.659595 | -2.298918 | 0.253817  |
| C                                          | -3.517763 | 0.345606  | -0.846087 |
| H                                          | -3.067632 | 2.426129  | -0.447923 |
| H                                          | -3.702592 | -1.799262 | -1.071379 |
| H                                          | -4.416593 | 0.566843  | -1.427820 |
| N                                          | 3.025273  | -0.945409 | -0.857444 |
| N                                          | 1.721065  | 1.031517  | 0.541197  |
| C                                          | 1.973278  | -1.226698 | -0.100604 |
| H                                          | 1.657614  | -2.273692 | -0.060462 |
| N                                          | 3.444380  | 0.315483  | -0.935997 |
| 25                                         |           |           |           |
| B_triazine_1 SCF Done: -741.836710513 A.U. |           |           |           |
| C                                          | -1.350715 | 0.105051  | -0.297060 |
| N                                          | -2.242839 | 0.483974  | 0.619811  |
| C                                          | -0.027556 | 0.824021  | -0.420827 |
| H                                          | 0.088247  | 1.143652  | -1.472440 |
| Li                                         | -1.528554 | 2.094753  | 1.622338  |
| N                                          | -0.039985 | 1.997013  | 0.464824  |
| N                                          | 0.857353  | 2.910389  | 0.228238  |
| O                                          | 1.654588  | 2.728495  | -0.712491 |
| C                                          | 1.113501  | -0.146327 | -0.110937 |
| C                                          | 2.155766  | -0.352120 | -1.025215 |
| C                                          | 1.136221  | -0.831873 | 1.114177  |
| C                                          | 3.197189  | -1.234857 | -0.725539 |
| H                                          | 2.155120  | 0.198967  | -1.968015 |
| C                                          | 2.179678  | -1.711693 | 1.417575  |
| H                                          | 0.330409  | -0.678091 | 1.837997  |
| C                                          | 3.212999  | -1.917028 | 0.496817  |
| H                                          | 4.004966  | -1.385369 | -1.447027 |
| H                                          | 2.184245  | -2.240779 | 2.374468  |
| H                                          | 4.029569  | -2.605120 | 0.731530  |
| N                                          | -2.824217 | -1.632527 | -1.029727 |
| C                                          | -1.673235 | -0.991725 | -1.131272 |
| H                                          | -0.971141 | -1.341436 | -1.893602 |
| C                                          | -3.388697 | -0.222461 | 0.676465  |

|                                                |           |           |           |
|------------------------------------------------|-----------|-----------|-----------|
| H                                              | -4.127239 | 0.071488  | 1.428342  |
| N                                              | -3.704044 | -1.244772 | -0.100781 |
| 25                                             |           |           |           |
| TS-BC_triazine_1 SCF Done: -741.806426952 A.U. |           |           |           |
| C                                              | -1.280494 | -0.121346 | -0.061760 |
| N                                              | -2.337855 | 0.358737  | 0.646689  |
| C                                              | -0.033420 | 0.593795  | -0.063146 |
| H                                              | 0.122777  | 1.512793  | -1.158687 |
| Li                                             | -1.721219 | 1.791139  | 1.899535  |
| N                                              | -0.114144 | 1.820193  | 0.771709  |
| N                                              | 0.094305  | 2.878687  | 0.105516  |
| O                                              | 0.348281  | 2.696756  | -1.158855 |
| C                                              | 1.282336  | -0.121414 | 0.008040  |
| C                                              | 1.386390  | -1.460216 | 0.439657  |
| C                                              | 2.480850  | 0.559557  | -0.299695 |
| C                                              | 2.626010  | -2.100319 | 0.525074  |
| H                                              | 0.490619  | -2.012194 | 0.732224  |
| C                                              | 3.719658  | -0.076111 | -0.196579 |
| H                                              | 2.443409  | 1.598626  | -0.631418 |
| C                                              | 3.801708  | -1.413313 | 0.207738  |
| H                                              | 2.671065  | -3.140374 | 0.860171  |
| H                                              | 4.629501  | 0.478557  | -0.442525 |
| H                                              | 4.771813  | -1.911548 | 0.282034  |
| C                                              | -1.518485 | -1.300711 | -0.843847 |
| H                                              | -0.715272 | -1.741195 | -1.441166 |
| N                                              | -2.691120 | -1.881994 | -0.908991 |
| N                                              | -3.730613 | -1.374363 | -0.207867 |
| C                                              | -3.502198 | -0.298577 | 0.523053  |
| H                                              | -4.354639 | 0.090969  | 1.090996  |
| 22                                             |           |           |           |
| D_triazine_1 SCF Done: -658.497513769 A.U.     |           |           |           |
| C                                              | -1.158275 | -0.163184 | -0.000035 |
| N                                              | -2.167270 | 0.799346  | 0.000028  |
| C                                              | 0.027716  | 0.605773  | 0.000007  |
| C                                              | 1.432620  | 0.184353  | 0.000006  |
| C                                              | 2.455092  | 1.153952  | 0.000127  |
| C                                              | 1.784744  | -1.179343 | -0.000117 |
| C                                              | 3.794959  | 0.766388  | 0.000127  |
| H                                              | 2.187475  | 2.212123  | 0.000223  |
| C                                              | 3.128349  | -1.559757 | -0.000116 |
| H                                              | 1.001802  | -1.939433 | -0.000210 |
| C                                              | 4.137993  | -0.591256 | 0.000007  |
| H                                              | 4.578024  | 1.529271  | 0.000223  |
| H                                              | 3.387278  | -2.621798 | -0.000211 |
| H                                              | 5.188814  | -0.892488 | 0.000008  |
| N                                              | -1.659234 | 2.032223  | 0.000052  |
| N                                              | -0.351509 | 1.902376  | 0.000043  |
| C                                              | -3.687515 | -0.941424 | -0.000017 |
| H                                              | -4.702047 | -1.342941 | -0.000018 |
| N                                              | -2.677972 | -1.865655 | -0.000075 |
| N                                              | -1.439416 | -1.478809 | -0.000083 |
| C                                              | -3.471528 | 0.414177  | 0.000037  |
| H                                              | -4.238475 | 1.190820  | 0.000074  |
